# Supplementary material for: Discovery and validation of DNA methylation markers for overall survival prognosis in patients with thymic epithelial tumors
Source: Clin Epigenetics. 2019 Mar 4;11:38. doi: 10.1186/s13148-019-0619-z (PMC6398263; doi:10.1186/s13148-019-0619-z)
Supplement: Supplementary file 1 — Table S2. List of significantly expressed methylation probes. In this table, the “mean_AB” and “mean_C” stands for the average values of beta values in cases with WHO histological type A to B3 and WHO histological type C, respectively. “FC” for fold changes which is calculated as (mean_C- mean_AB)/mean_AB. The “p” for crude probabilities resulting from t test for each probe. (XLSX 1490 kb) [file 13148_2019_619_MOESM1_ESM.xlsx]

## Sheet: Sheet1
probe	Accession	SYMBOL	Group	Islands_Name	CpG_Island	mean_AB	mean_C	FC	p	adjp
cg04077141	NM_002473	MYH9	5'UTR	chr22:36782965-36784492	N_Shore	0.196605	0.0446636	-0.772826	2.20728e-35	8.66695e-30
cg20440718	NA	NA	NA	NA	NA	0.618054	0.944027	0.527419	7.41309e-34	1.45539e-28
cg02330500	NM_024734	CLMN	Body	NA	NA	0.326185	0.0587636	-0.819846	2.56734e-28	3.36025e-23
cg14343062	NM_000124	ERCC6	5'UTR	chr10:50746634-50747329	N_Shore	0.100724	0.0237091	-0.764613	5.36567e-28	5.26712e-23
cg27101112	NM_001031734	FDX1L	TSS200	chr19:10426381-10426723	S_Shore	0.0953478	0.0348545	-0.634448	1.47109e-27	9.62715e-23
cg26967415	NM_001080424	KDM6B	5'UTR	chr17:7745066-7748420	Island	0.101884	0.0267727	-0.737224	1.24016e-27	9.73905e-23
cg20227255	NM_003131	SRF	Body	chr6:43142013-43142217	Island	0.117185	0.0215	-0.816529	6.46198e-26	2.53732e-21
cg09791324	NM_015872	NA	TSS1500	chr1:154973250-154974358	Island	0.262121	0.103973	-0.603341	6.09863e-26	2.66072e-21
cg07522644	NM_003131	SRF	Body	chr6:43142013-43142217	Island	0.160679	0.0231636	-0.855839	5.57307e-26	2.73535e-21
cg02215357	NM_001011724	HNRNPA1L2	TSS1500	chr13:53191405-53191872	N_Shore	0.23898	0.0522818	-0.781229	7.79893e-26	2.78388e-21
cg01965380	NM_001134479	LRRC8D	5'UTR	NA	NA	0.677987	0.229191	-0.661954	1.64119e-24	5.37016e-20
cg19433066	NM_003848	SUCLG2	TSS200	chr3:67704628-67705051	S_Shore	0.0593088	0.0258091	-0.564836	2.42639e-24	7.32868e-20
cg14733855	NM_015675	GADD45B	Body	chr19:2477134-2477377	Island	0.0316053	0.0140909	-0.55416	3.51375e-24	9.85488e-20
cg06197966	NM_003174	SVIL	5'UTR	NA	NA	0.213066	0.0495273	-0.76755	4.11432e-24	1.077e-19
cg03607117	NM_001005158	SFMBT1	TSS1500	chr3:53078956-53081101	Island	0.0926558	0.0258636	-0.720863	8.42227e-24	1.94531e-19
cg03843031	NM_181802	UBE2C	TSS1500	chr20:44440946-44441655	Island	0.128922	0.0354727	-0.724852	8.1896e-24	2.0098e-19
cg05048002	NM_184043	ALDOA	5'UTR	chr16:30076310-30077872	Island	0.196542	0.0374455	-0.809479	9.85077e-24	2.03576e-19
cg06729642	NR_024434	MAP3K14-AS1	TSS1500	chr17:43324689-43325729	Island	0.185524	0.0450909	-0.756954	9.55685e-24	2.08474e-19
cg27141509	NA	NA	NA	NA	NA	0.628059	0.125591	-0.800033	1.3797e-23	2.57973e-19
cg02229757	NA	NA	NA	NA	NA	0.215311	0.0440636	-0.795349	7.40418e-23	1.32149e-18
cg11326919	NR_024434	MAP3K14-AS1	TSS1500	chr17:43324689-43325729	Island	0.197696	0.0205545	-0.89603	7.77997e-23	1.32819e-18
cg00968800	NM_001039577	CCNL2	TSS1500	chr1:1334071-1335602	S_Shore	0.0885602	0.0253273	-0.714011	8.31494e-23	1.36037e-18
cg14765206	NM_015221	DNMBP	5'UTR	NA	NA	0.621126	0.184827	-0.702432	1.05535e-22	1.65754e-18
cg22927510	NM_001113755	TYMP	5'UTR	chr22:50963608-50970768	Island	0.0737823	0.0201545	-0.726838	5.76637e-22	8.7084e-18
cg11859584	NM_205843	NFIC	Body	chr19:3358495-3361248	S_Shore	0.249746	0.0331182	-0.867393	3.70346e-21	5.19348e-17
cg17285325	NM_001113755	TYMP	1stExon	chr22:50963608-50970768	Island	0.0863655	0.0185818	-0.784847	5.09926e-21	6.90428e-17
cg26955540	NM_020210	SEMA4B	TSS1500	chr15:90727879-90728570	N_Shore	0.558116	0.0838909	-0.849689	8.04109e-21	1.0185e-16
cg16757281	NM_032366	METTL26	Body	chr16:682634-687106	Island	0.0585929	0.0189091	-0.67728	8.02347e-21	1.05015e-16
cg25458520	NM_002754	MAPK13	Body	chr6:36098039-36098621	S_Shore	0.116078	0.0392364	-0.661982	9.42706e-21	1.15674e-16
cg00521588	NM_033549	TRIM41	TSS1500	chr5:180649487-180649768	N_Shore	0.0770133	0.0335091	-0.564892	1.3796e-20	1.64152e-16
cg11653410	NA	NA	NA	NA	NA	0.124669	0.0339455	-0.727715	2.44009e-20	2.81796e-16
cg02016130	NR_024031	DANCR	TSS1500	chr4:53578358-53579238	Island	0.185107	0.0270909	-0.853647	2.73555e-20	3.06892e-16
cg03670835	NM_001031734	FDX1L	TSS200	chr19:10426381-10426723	S_Shore	0.0720628	0.0257545	-0.64261	1.04005e-19	1.13439e-15
cg22230538	NA	NA	NA	NA	NA	0.096977	0.0146727	-0.848699	1.83164e-19	1.94378e-15
cg18361093	NM_152911	PAOX	Body	chr10:135191594-135193307	Island	0.305919	0.0521818	-0.829426	2.9229e-19	2.86921e-15
cg07895169	NM_144725	TTC23L	TSS200	chr5:34838921-34839624	Island	0.0468717	0.0221636	-0.527142	2.83357e-19	2.92792e-15
cg03254916	NM_001114309	ELF3	TSS1500	NA	NA	0.155362	0.0417727	-0.731126	8.979e-19	8.5991e-15
cg07219769	NM_002305	LGALS1	TSS200	chr22:38073037-38073412	N_Shore	0.331042	0.0877545	-0.734914	9.29642e-19	8.69111e-15
cg12461469	NM_007282	RNF13	TSS200	chr3:149530293-149531234	Island	0.241157	0.0600727	-0.750897	1.0459e-18	9.33356e-15
cg18021785	NM_021807	EXOC4	Body	NA	NA	0.433833	0.8389	0.933695	2.02019e-18	1.76274e-14
cg03844211	NM_014641	MDC1	5'UTR	chr6:30684836-30685503	N_Shore	0.125206	0.0315727	-0.747834	2.10716e-18	1.79866e-14
cg20883194	NM_001025356	ANO6	Body	NA	NA	0.373266	0.817191	1.1893	2.71045e-18	2.2644e-14
cg19197419	NM_181802	UBE2C	1stExon	chr20:44440946-44441655	Island	0.143651	0.0412545	-0.712815	2.92478e-18	2.39255e-14
cg08322234	NM_138962	MSI2	Body	NA	NA	0.500194	0.8637	0.726731	3.39824e-18	2.72312e-14
cg22690188	NA	NA	NA	NA	NA	0.237058	0.5332	1.24924	4.5871e-18	3.60228e-14
cg24143611	NM_015710	NOP53	Body	NA	NA	0.547208	0.977018	0.78546	5.23547e-18	4.03083e-14
cg15704521	NM_007353	GNA12	Body	chr7:2774444-2774655	N_Shore	0.608326	0.914318	0.503008	5.43463e-18	4.1037e-14
cg00374717	NM_014960	ARSG	5'UTR	NA	NA	0.578405	0.914382	0.580867	6.31676e-18	4.6798e-14
cg04603812	NM_023076	UNKL	5'UTR	chr16:1429050-1430104	Island	0.0326044	0.0133727	-0.589849	7.40955e-18	5.38775e-14
cg09217898	NA	NA	NA	NA	NA	0.622081	0.206	-0.668854	9.13156e-18	6.40274e-14
cg26805405	NM_015080	NRXN2	TSS1500	chr11:64490493-64491146	S_Shore	0.0659513	0.0248818	-0.622725	1.47387e-17	1.0153e-13
cg01616446	NM_199184	DNPH1	Body	chr6:43196811-43197340	N_Shore	0.053554	0.0182545	-0.659137	2.09119e-17	1.39171e-13
cg18122767	NM_003836	DLK1	TSS1500	chr14:101192851-101193499	N_Shore	0.683652	0.287764	-0.579079	2.19636e-17	1.43735e-13
cg08009902	NA	NA	NA	NA	NA	0.510573	0.869936	0.703845	2.54436e-17	1.61137e-13
cg27515052	NA	NA	NA	NA	NA	0.551205	0.8832	0.602307	4.34974e-17	2.66865e-13
cg04186657	NM_018950	HLA-F	TSS1500	chr6:29691106-29692093	N_Shore	0.145078	0.0353909	-0.756056	4.32047e-17	2.69277e-13
cg11704790	NA	NA	NA	NA	NA	0.297578	0.612045	1.05676	5.16203e-17	2.98071e-13
cg24440302	NM_001135054	SIGIRR	Body	chr11:406491-407871	Island	0.106806	0.0175909	-0.835301	5.11027e-17	2.99487e-13
cg11238542	NA	NA	NA	NA	NA	0.202391	0.0569636	-0.718547	5.63975e-17	3.16352e-13
cg19395441	NM_022895	C12orf43	TSS200	chr12:121454153-121454357	S_Shore	0.112593	0.0403727	-0.641427	5.82263e-17	3.2201e-13
cg24391122	NR_030717	SNAPC2	Body	chr19:7985065-7985390	S_Shore	0.0846097	0.0251818	-0.702377	6.01187e-17	3.27858e-13
cg13566279	NA	NA	NA	NA	NA	0.172681	0.0262364	-0.848064	6.77761e-17	3.64555e-13
cg11545871	NM_032340	UQCC2	TSS1500	chr6:33679158-33679701	S_Shore	0.121363	0.0379909	-0.686964	6.94894e-17	3.68719e-13
cg10959726	NM_001142798	C17orf49	TSS1500	chr17:6917569-6918539	Island	0.0441248	0.0176455	-0.600101	8.19137e-17	4.28849e-13
cg12551567	NM_021872	CDC25B	1stExon	chr20:3776618-3777374	Island	0.0903434	0.0410455	-0.545673	1.00333e-16	5.18368e-13
cg16292333	NM_032960	MAPKAPK2	TSS1500	chr1:206858091-206859651	N_Shore	0.154721	0.0455	-0.705923	1.14045e-16	5.8156e-13
cg24376214	NM_001146202	RASGRP4	TSS1500	NA	NA	0.677698	0.207755	-0.693441	1.59085e-16	8.00834e-13
cg05920908	NM_001029882	AHDC1	5'UTR	chr1:27894927-27895524	Island	0.0843416	0.0322273	-0.617896	2.08347e-16	9.97661e-13
cg12946660	NM_007040	HNRNPUL1	Body	chr19:41770013-41771113	S_Shore	0.373158	0.0831364	-0.777208	2.26829e-16	1.07307e-12
cg16676037	NA	NA	NA	NA	NA	0.276824	0.118682	-0.571273	2.39236e-16	1.11829e-12
cg08962271	NM_004910	PITPNM1	TSS1500	chr11:67275067-67276431	N_Shore	0.259459	0.0693636	-0.732661	3.01241e-16	1.39157e-12
cg22719037	NM_005475	SH2B3	TSS1500	chr12:111842938-111844392	N_Shore	0.185997	0.0526	-0.7172	3.05481e-16	1.39475e-12
cg01161216	NM_014972	TCF25	TSS1500	chr16:89939432-89940812	Island	0.0781292	0.0287909	-0.631496	3.26277e-16	1.47257e-12
cg17133388	NM_014367	FAM162A	TSS1500	chr3:122102851-122103198	N_Shore	0.122721	0.0446	-0.636575	3.37534e-16	1.50607e-12
cg21749312	NM_002228	JUN	1stExon	chr1:59247461-59250940	Island	0.132239	0.0470727	-0.644033	6.22144e-16	2.74479e-12
cg03370270	NA	NA	NA	NA	NA	0.105194	0.0313455	-0.702022	6.66314e-16	2.907e-12
cg16662267	NM_001757	CBR1	Body	chr21:37442140-37442778	Island	0.0554265	0.0231455	-0.582412	1.21002e-15	5.10879e-12
cg25979108	NM_001100418	REX1BD	Body	chr19:18699422-18700554	Island	0.14369	0.0534273	-0.628178	1.26663e-15	5.29091e-12
cg18247055	NM_172242	SPAG6	TSS200	chr10:22634000-22634862	Island	0.140664	0.530436	2.77095	1.31137e-15	5.42013e-12
cg03270929	NM_147129	ALS2CL	TSS200	chr3:46734731-46735717	Island	0.0257717	0.0117545	-0.543897	1.60975e-15	6.44973e-12
cg15362957	NA	NA	NA	NA	NA	0.326397	0.641318	0.964839	2.55219e-15	1.01225e-11
cg04591534	NM_025258	VWA7	TSS200	NA	NA	0.114096	0.0367545	-0.677862	2.67397e-15	1.04994e-11
cg26937798	NM_001008699	IL4R	5'UTR	chr16:27324885-27325695	S_Shore	0.0891195	0.0346727	-0.610941	3.39676e-15	1.30759e-11
cg27388962	NR_024475	LINC00704	Body	NA	NA	0.60631	0.1624	-0.73215	3.73466e-15	1.42371e-11
cg16900796	NM_001145056	SLC44A2	3'UTR	NA	NA	0.305055	0.0614273	-0.798635	4.07666e-15	1.52449e-11
cg01020263	NM_022162	NOD2	Body	NA	NA	0.147735	0.0397182	-0.731152	5.37064e-15	1.98943e-11
cg13868520	NM_001243	TNFRSF8	Body	NA	NA	0.586783	0.1966	-0.664953	5.55565e-15	2.03873e-11
cg00521239	NM_201382	PLEC	Body	chr8:145016417-145016916	N_Shore	0.262027	0.0674818	-0.742462	5.69222e-15	2.06951e-11
cg05347965	NM_138962	MSI2	Body	NA	NA	0.425683	0.907682	1.13229	6.52499e-15	2.35051e-11
cg20934881	NM_020452	ATP8B2	Body	chr1:154300975-154301528	Island	0.222128	0.0714	-0.678564	6.72803e-15	2.40162e-11
cg08000118	NA	NA	NA	NA	NA	0.0714788	0.0281909	-0.605604	7.45914e-15	2.63861e-11
cg07218880	NM_080687	UPF3A	TSS1500	chr13:115046754-115048034	N_Shore	0.517545	0.1297	-0.749394	8.22143e-15	2.88229e-11
cg12207450	NM_005654	NR2F1	5'UTR	chr5:92919558-92921430	N_Shore	0.192908	0.0840364	-0.564371	9.25048e-15	3.21436e-11
cg09643151	NM_003879	CFLAR	5'UTR	chr2:201983198-201983709	N_Shore	0.0903088	0.0357273	-0.604388	9.45333e-15	3.25603e-11
cg00088042	NM_015062	PPRC1	TSS1500	chr10:103892659-103893590	N_Shore	0.107463	0.0330273	-0.692663	9.66201e-15	3.29897e-11
cg04925858	NA	NA	NA	NA	NA	0.120927	0.0275636	-0.772063	1.24679e-14	4.1139e-11
cg09695362	NR_024434	MAP3K14-AS1	TSS1500	chr17:43324689-43325729	Island	0.171053	0.0239364	-0.860065	1.63055e-14	5.29126e-11
cg24723883	NM_052847	GNG7	5'UTR	chr19:2607725-2607967	S_Shore	0.597797	0.213964	-0.64208	2.00504e-14	6.45315e-11
cg27340794	NM_001109938	C6orf136	TSS200	chr6:30614721-30615643	N_Shore	0.143455	0.0526364	-0.633081	2.27924e-14	7.27603e-11
cg00554969	NM_001109878	TBX22	Body	NA	NA	0.22775	0.587282	1.57862	2.46241e-14	7.67358e-11
cg13054119	NM_001038633	RSPO1	5'UTR	chr1:38099677-38100864	N_Shore	0.0992929	0.0448091	-0.548718	2.42784e-14	7.6879e-11
cg13540126	NA	NA	NA	NA	NA	0.270486	0.568527	1.10187	2.46121e-14	7.73123e-11
cg23490161	NM_004168	SDHA	1stExon	chr5:218036-219128	Island	0.136505	0.307218	1.2506	2.55239e-14	7.89137e-11
cg26394825	NM_018223	CHFR	TSS1500	chr12:133463807-133464858	Island	0.0311274	0.0135091	-0.566007	2.69632e-14	8.27123e-11
cg07166266	NM_014230	SRP68	Body	chr17:74068174-74068756	N_Shore	0.481351	0.120673	-0.749304	3.2038e-14	9.67678e-11
cg25913761	NM_020210	SEMA4B	TSS1500	chr15:90727879-90728570	N_Shore	0.520209	0.1407	-0.729532	3.44027e-14	1.03117e-10
cg00565090	NM_015710	NOP53	Body	NA	NA	0.418696	0.687145	0.641158	3.66994e-14	1.09168e-10
cg00277898	NM_025258	VWA7	TSS200	NA	NA	0.175011	0.0500455	-0.714043	3.73032e-14	1.10129e-10
cg22218709	NM_001037165	FOXK1	Body	chr7:4721637-4722779	S_Shore	0.105019	0.0389545	-0.629073	4.19723e-14	1.20296e-10
cg00403955	NR_024320	LITAF	Body	chr16:11680008-11681275	Island	0.192188	0.0374455	-0.805162	4.17799e-14	1.20625e-10
cg22584802	NM_001130720	AHCYL2	Body	NA	NA	0.351961	0.0836091	-0.762448	4.71624e-14	1.34192e-10
cg17124583	NM_002051	GATA3	Body	chr10:8091374-8098329	Island	0.32367	0.546873	0.6896	4.88834e-14	1.38088e-10
cg23987736	NM_044472	CDC42	5'UTR	chr1:22379009-22380029	S_Shore	0.166682	0.0503364	-0.69801	5.49164e-14	1.5293e-10
cg23463310	NR_028272	NEAT1	TSS1500	chr11:65189463-65190295	N_Shore	0.057531	0.0258	-0.551546	6.68083e-14	1.84736e-10
cg07216976	NM_001135051	FAM160B1	TSS1500	chr10:116581522-116582434	N_Shore	0.326264	0.0840182	-0.742484	6.93973e-14	1.90553e-10
cg01578875	NM_178835	ZNF827	Body	NA	NA	0.462065	0.903736	0.955866	7.35388e-14	1.97776e-10
cg00547839	NM_018396	METTL2B	TSS200	chr7:128116667-128117312	N_Shore	0.0625912	0.0296364	-0.526509	7.68795e-14	2.05354e-10
cg23824902	NM_032315	SLC25A33	Body	NA	NA	0.415804	0.855136	1.05659	7.78086e-14	2.06431e-10
cg22305258	NM_001100812	CXCL16	TSS200	chr17:4642038-4643410	Island	0.0918478	0.0245455	-0.732759	7.85136e-14	2.06903e-10
cg04962541	NM_031449	ZMIZ2	5'UTR	chr7:44788714-44789119	Island	0.072177	0.0306273	-0.575664	8.24946e-14	2.15945e-10
cg13643774	NA	NA	NA	NA	NA	0.180807	0.0530909	-0.706367	9.09059e-14	2.36387e-10
cg15136410	NM_020151	STARD7	Body	chr2:96873851-96874824	N_Shore	0.584533	0.222264	-0.619758	1.00508e-13	2.59637e-10
cg04284535	NM_001079675	ETV4	TSS1500	chr17:41622604-41624165	Island	0.199737	0.0730727	-0.634156	1.09968e-13	2.82218e-10
cg13689560	NM_001031735	IZUMO4	TSS1500	chr19:2095395-2095727	Island	0.101901	0.0240909	-0.763585	1.16836e-13	2.95975e-10
cg15028052	NM_020713	ZNF512B	3'UTR	chr20:62586919-62588218	S_Shore	0.0584788	0.0107818	-0.815628	1.16214e-13	2.96311e-10
cg06560379	NM_004556	NFKBIE	Body	chr6:44232880-44233447	N_Shore	0.464636	0.0466364	-0.899628	1.24206e-13	3.10635e-10
cg20164887	NM_001113755	TYMP	5'UTR	chr22:50963608-50970768	Island	0.32231	0.0934909	-0.709935	1.3131e-13	3.26324e-10
cg11691093	NM_002473	MYH9	Body	NA	NA	0.177866	0.0333273	-0.812627	1.32877e-13	3.28142e-10
cg20338754	NM_198128	RNF138	Body	chr18:29671757-29673314	S_Shelf	0.392884	0.7986	1.03266	1.81246e-13	4.39302e-10
cg24978383	NA	NA	NA	NA	NA	0.223181	0.640055	1.86788	1.9562e-13	4.68358e-10
cg04962480	NM_003406	YWHAZ	5'UTR	chr8:101962644-101965427	N_Shore	0.344562	0.0729182	-0.788374	2.04378e-13	4.80537e-10
cg14488957	NM_030649	ACAP3	TSS1500	chr1:1242400-1245185	Island	0.116955	0.0556818	-0.523903	2.23635e-13	5.22685e-10
cg11198596	NM_015541	LRIG1	Body	chr3:66550318-66551848	N_Shelf	0.403506	0.738845	0.831063	2.82041e-13	6.40141e-10
cg16093065	NM_001024843	TNRC6B	3'UTR	NA	NA	0.497307	0.7844	0.577295	2.93682e-13	6.6273e-10
cg13621184	NM_015318	ARHGEF18	TSS1500	chr19:7459779-7460376	N_Shore	0.483241	0.118818	-0.754122	3.18514e-13	7.14661e-10
cg06662132	NM_030912	TRIM8	Body	chr10:104401821-104404968	S_Shore	0.201981	0.0342909	-0.830227	3.26252e-13	7.27862e-10
cg08995609	NM_004292	RIN1	TSS200	chr11:66102024-66102279	S_Shore	0.10395	0.0379636	-0.634788	3.97708e-13	8.77311e-10
cg21902817	NM_001170803	LARP4	TSS1500	chr12:50794549-50794920	N_Shore	0.279465	0.100182	-0.641522	3.96833e-13	8.80325e-10
cg11699666	NM_178148	SLC35B2	TSS1500	chr6:44224698-44225486	S_Shore	0.112281	0.0259273	-0.769087	4.02891e-13	8.83778e-10
cg13596773	NM_001002252	ARL6IP4	Body	chr12:123464820-123465972	Island	0.106966	0.0435636	-0.592735	4.25593e-13	9.28391e-10
cg20336172	NM_007353	GNA12	Body	chr7:2774444-2774655	N_Shore	0.526023	0.909064	0.728182	5.04923e-13	1.08934e-09
cg10540754	NM_030797	FAM49A	5'UTR	NA	NA	0.0963257	0.0196909	-0.79558	5.1282e-13	1.10033e-09
cg06253072	NM_032340	UQCC2	TSS1500	chr6:33679158-33679701	S_Shore	0.21285	0.0559545	-0.737118	5.21159e-13	1.11214e-09
cg20777128	NM_080822	OVCA2	TSS200	chr17:1944947-1945621	Island	0.0948177	0.0316182	-0.666537	5.51509e-13	1.17055e-09
cg00513208	NM_080599	UPF2	TSS1500	chr10:12084236-12085431	S_Shore	0.548293	0.160027	-0.708135	5.97033e-13	1.26036e-09
cg27009703	NM_152739	HOXA9	1stExon	chr7:27203915-27206462	Island	0.229509	0.603709	1.63044	6.01882e-13	1.2638e-09
cg02218768	NM_015898	ZBTB7A	5'UTR	chr19:4064086-4067980	Island	0.0821027	0.0285727	-0.651988	6.19179e-13	1.2932e-09
cg09740037	NM_003901	SGPL1	TSS200	chr10:72575513-72576302	Island	0.0441097	0.0181455	-0.588629	6.62622e-13	1.37662e-09
cg10333802	NM_014982	PCNX1	TSS1500	chr14:71373964-71375402	N_Shore	0.0768478	0.0371273	-0.516873	6.7799e-13	1.40113e-09
cg02538248	NM_032268	ZNRF1	Body	NA	NA	0.646112	0.163518	-0.74692	7.20067e-13	1.48029e-09
cg08591265	NM_006924	SRSF1	Body	chr17:56083750-56085373	N_Shore	0.626538	0.125764	-0.799272	7.527e-13	1.53932e-09
cg02840794	NM_024747	HPS6	1stExon	chr10:103824894-103825778	Island	0.0863558	0.0250909	-0.709447	7.87715e-13	1.60258e-09
cg03067226	NM_000365	TPI1	TSS1500	chr12:6976392-6977393	N_Shore	0.082931	0.0303909	-0.63354	8.29257e-13	1.6784e-09
cg26539232	NM_005224	ARID3A	TSS1500	chr19:924788-925001	Island	0.0882345	0.0352091	-0.60096	8.5038e-13	1.71233e-09
cg20300343	NA	NA	NA	NA	NA	0.131169	0.544255	3.14926	8.81801e-13	1.7487e-09
cg16057598	NM_004405	DLX2	TSS1500	chr2:172964762-172967857	Island	0.0862018	0.0322091	-0.626352	8.94288e-13	1.76455e-09
cg24119607	NM_016463	CXXC5	5'UTR	chr5:139047905-139048235	N_Shore	0.357814	0.101236	-0.71707	9.2221e-13	1.81054e-09
cg06461306	NM_001164759	PRKAR1B	TSS200	chr7:766085-766952	S_Shore	0.111373	0.0528	-0.525916	9.29432e-13	1.81564e-09
cg27258272	NM_006831	CLP1	TSS1500	chr11:57424937-57425262	N_Shore	0.197703	0.0549364	-0.722126	1.00559e-12	1.94507e-09
cg23397278	NM_004322	BAD	1stExon	chr11:64052607-64053652	N_Shore	0.0725398	0.0273727	-0.622652	1.03468e-12	1.98181e-09
cg04211179	NM_003443	ZBTB17	5'UTR	chr1:16301902-16302672	N_Shore	0.497881	0.0767636	-0.845819	1.05109e-12	2.00346e-09
cg22209010	NM_021135	RPS6KA2	Body	NA	NA	0.516086	0.831718	0.611589	1.15644e-12	2.19363e-09
cg21756806	NM_001142673	ATG13	TSS1500	chr11:46638637-46639486	N_Shore	0.18084	0.0547364	-0.697321	1.19751e-12	2.2606e-09
cg13740187	NM_152263	TPM3	TSS200	NA	NA	0.362863	0.0580545	-0.84001	1.26062e-12	2.36835e-09
cg01219451	NA	NA	NA	NA	NA	0.196917	0.386891	0.964743	1.33577e-12	2.49758e-09
cg16525470	NM_199141	CARM1	Body	chr19:10981486-10983266	S_Shore	0.201096	0.0541909	-0.730523	1.57623e-12	2.93322e-09
cg25826360	NM_024599	RHBDF2	5'UTR	chr17:74496992-74497632	N_Shore	0.12376	0.0389818	-0.685021	1.66874e-12	3.09073e-09
cg14446942	NM_002211	ITGB1	TSS1500	chr10:33246271-33247707	S_Shore	0.287026	0.0900727	-0.686186	1.7413e-12	3.20999e-09
cg05406954	NM_144641	PPM1M	TSS200	chr3:52279601-52280140	Island	0.203779	0.0672636	-0.669918	1.77828e-12	3.26283e-09
cg10089963	NM_006186	NR4A2	Body	chr2:157184389-157184632	N_Shore	0.562705	0.8558	0.520867	1.79056e-12	3.27008e-09
cg14394837	NM_014238	KSR1	5'UTR	NA	NA	0.660142	0.186636	-0.717279	1.93981e-12	3.52626e-09
cg19172052	NM_007246	KLHL2	Body	chr4:166128385-166129255	S_Shore	0.109662	0.0519545	-0.52623	2.00611e-12	3.62998e-09
cg15460093	NM_001164489	ADAM8	1stExon	chr10:135089969-135090491	Island	0.0362575	0.0140273	-0.613121	2.22423e-12	3.9879e-09
cg08139247	NM_175060	CLEC14A	1stExon	chr14:38724254-38725537	Island	0.179898	0.581936	2.23481	2.43582e-12	4.32775e-09
cg21370491	NM_152678	DENND6A	TSS200	chr3:57678339-57678938	S_Shore	0.0993664	0.0397727	-0.599737	2.50192e-12	4.42517e-09
cg06075789	NA	NA	NA	NA	NA	0.0945841	0.0391545	-0.586034	2.80184e-12	4.93342e-09
cg09195593	NM_001080424	KDM6B	5'UTR	chr17:7745066-7748420	N_Shore	0.0348292	0.0143455	-0.58812	2.82124e-12	4.9454e-09
cg21139312	NM_138962	MSI2	Body	NA	NA	0.541521	0.962055	0.776578	2.86564e-12	4.97877e-09
cg03278488	NM_017740	ZDHHC7	5'UTR	chr16:85044730-85045436	N_Shore	0.0975655	0.0403	-0.586944	2.85335e-12	4.97945e-09
cg01946401	NM_001015051	RUNX2	1stExon	NA	NA	0.467227	0.797682	0.70727	2.90662e-12	4.98381e-09
cg18661237	NM_004886	APBA3	5'UTR	chr19:3761480-3761826	N_Shore	0.175394	0.0800909	-0.543365	2.90621e-12	5.00496e-09
cg14136214	NM_032552	DAB2IP	3'UTR	NA	NA	0.519831	0.8854	0.703246	2.9042e-12	5.02353e-09
cg15936999	NM_199242	UNC13D	TSS200	NA	NA	0.0909159	0.0192455	-0.788316	3.07349e-12	5.22432e-09
cg20707126	NM_018412	ST7	Body	NA	NA	0.652988	0.151773	-0.767572	3.431e-12	5.80686e-09
cg17654050	NM_006186	NR4A2	Body	chr2:157185557-157186355	N_Shore	0.543846	0.852673	0.567857	3.56552e-12	6.00864e-09
cg08858130	NM_001013836	MAD1L1	Body	NA	NA	0.328422	0.781164	1.37854	3.6528e-12	6.10333e-09
cg14341953	NM_005866	SIGMAR1	Body	chr9:34637200-34637950	Island	0.0523398	0.0157545	-0.698995	3.64467e-12	6.11577e-09
cg00346970	NM_170740	ALDH5A1	Body	chr6:24494664-24495670	S_Shelf	0.412459	0.905145	1.19451	3.91202e-12	6.50876e-09
cg09504482	NM_002015	FOXO1	Body	chr13:41238500-41241750	Island	0.0803009	0.0339636	-0.577045	3.9371e-12	6.52285e-09
cg07011778	NA	NA	NA	NA	NA	0.156647	0.0579364	-0.630147	4.18335e-12	6.9017e-09
cg26968245	NM_004322	BAD	TSS1500	chr11:64052607-64053652	Island	0.0467204	0.0211818	-0.546625	4.30706e-12	7.04659e-09
cg24522654	NA	NA	NA	NA	NA	0.658424	0.192009	-0.708381	4.50524e-12	7.34024e-09
cg20107640	NA	NA	NA	NA	NA	0.0930717	0.0294364	-0.683724	4.60864e-12	7.47768e-09
cg22009908	NM_001962	EFNA5	Body	NA	NA	0.38685	0.144255	-0.627105	4.65133e-12	7.51588e-09
cg12243115	NM_018398	CACNA2D3	Body	NA	NA	0.0903363	0.0258091	-0.7143	4.73028e-12	7.55025e-09
cg07764473	NM_001123383	BCOR	TSS1500	chrX:40034239-40036007	S_Shore	0.50368	0.880136	0.747413	4.71921e-12	7.56332e-09
cg15978832	NM_003115	UAP1	TSS1500	chr1:162530856-162531853	Island	0.0588159	0.0292636	-0.502454	4.8937e-12	7.74809e-09
cg07427436	NM_005026	PIK3CD	5'UTR	chr1:9749295-9750228	Island	0.145208	0.0454909	-0.686719	4.89183e-12	7.77649e-09
cg22519017	NM_020062	SLC2A4RG	Body	chr20:62368955-62371962	Island	0.151914	0.0492364	-0.675894	5.60365e-12	8.66255e-09
cg05217983	NM_001015051	RUNX2	Body	NA	NA	0.334635	0.791473	1.36519	5.64862e-12	8.69783e-09
cg06968164	NA	NA	NA	NA	NA	0.630757	0.171864	-0.727528	5.69184e-12	8.73015e-09
cg14935206	NM_004739	MTA2	Body	chr11:62368454-62370491	N_Shore	0.47004	0.164264	-0.650533	6.03478e-12	9.1844e-09
cg13052625	NM_014966	DHX30	Body	chr3:47866474-47866882	N_Shore	0.477323	0.186655	-0.608955	6.31025e-12	9.52977e-09
cg24774812	NM_020663	RHOJ	Body	NA	NA	0.11981	0.0488364	-0.592384	7.02073e-12	1.04818e-08
cg06002197	NM_020188	CMC2	5'UTR	chr16:81040134-81041325	N_Shore	0.341369	0.154591	-0.547144	7.3305e-12	1.09028e-08
cg04163119	NM_001134493	TOMM6	TSS1500	chr6:41753880-41755576	Island	0.107709	0.0528727	-0.509114	7.36355e-12	1.09106e-08
cg15110296	NR_024061	LOH12CR2	Body	chr12:12509911-12510428	N_Shore	0.372301	0.0904364	-0.757088	7.4271e-12	1.09634e-08
cg08519643	NM_001130716	PLAC8	5'UTR	chr4:84030630-84031309	Island	0.0786779	0.0266636	-0.661104	8.16847e-12	1.20126e-08
cg25104512	NM_147129	ALS2CL	TSS1500	chr3:46734731-46735717	Island	0.0625832	0.0284182	-0.545913	8.24002e-12	1.20726e-08
cg09642825	NM_024735	FBXO31	Body	chr16:87416583-87418238	N_Shore	0.407969	0.0957727	-0.765245	8.35894e-12	1.22014e-08
cg22491171	NM_033112	RRP36	TSS1500	chr6:42989178-42989510	Island	0.0817912	0.0365636	-0.552963	8.50811e-12	1.23274e-08
cg19680850	NM_025079	ZC3H12A	Body	chr1:37939723-37940650	S_Shelf	0.134416	0.0625909	-0.534349	9.31779e-12	1.34509e-08
cg00063111	NR_002325	SNORA6	TSS1500	chr3:39447890-39448644	S_Shore	0.277577	0.0806545	-0.709434	9.74944e-12	1.40225e-08
cg01647632	NM_178232	HAPLN3	TSS200	chr15:89438176-89438850	S_Shore	0.0589018	0.0184	-0.687615	1.00707e-11	1.43792e-08
cg00310463	NM_178554	KY	TSS1500	chr3:134369464-134370242	S_Shore	0.693936	0.336718	-0.514771	1.03448e-11	1.47171e-08
cg15035705	NM_014757	MAML1	TSS1500	chr5:179159467-179160534	N_Shore	0.24274	0.0459636	-0.810646	1.2181e-11	1.72669e-08
cg23352424	NA	NA	NA	NA	NA	0.763463	0.364091	-0.523106	1.27473e-11	1.80046e-08
cg13770361	NM_004639	BAG6	TSS1500	chr6:31619856-31620525	S_Shore	0.484873	0.226	-0.533898	1.28269e-11	1.8052e-08
cg17100751	NM_004481	GALNT2	Body	chr1:230415342-230415689	N_Shore	0.605666	0.911809	0.505464	1.34414e-11	1.87823e-08
cg00380985	NM_001006938	TCEAL6	5'UTR	chrX:101397305-101397514	N_Shore	0.222139	0.5616	1.52815	1.4027e-11	1.9531e-08
cg12608132	NM_001430	EPAS1	Body	NA	NA	0.514844	0.866318	0.68268	1.44224e-11	2.00106e-08
cg06585203	NM_003379	EZR	Body	chr6:159239081-159240775	N_Shore	0.25658	0.0747	-0.708862	1.47704e-11	2.04212e-08
cg22093901	NM_003442	ZNF143	Body	NA	NA	0.136493	0.0589091	-0.568409	1.5559e-11	2.13612e-08
cg18728025	NM_024574	NDNF	5'UTR	chr4:121992003-121993703	N_Shore	0.472865	0.788809	0.66815	1.56895e-11	2.13908e-08
cg18523477	NM_017495	RBM38	Body	chr20:55966212-55966964	S_Shore	0.337071	0.0840182	-0.75074	1.56869e-11	2.14617e-08
cg02525822	NM_024731	KLHL36	5'UTR	chr16:84681760-84682732	Island	0.0994115	0.0364273	-0.633571	1.60623e-11	2.1748e-08
cg04150136	NA	NA	NA	NA	NA	0.0703646	0.0113909	-0.838116	1.60363e-11	2.17879e-08
cg21123160	NM_014229	SLC6A11	TSS200	chr3:10857687-10858447	Island	0.255057	0.519727	1.03769	1.69616e-11	2.28083e-08
cg07960083	NA	NA	NA	NA	NA	0.493046	0.8224	0.667998	1.70253e-11	2.28158e-08
cg00701064	NM_001145853	WFS1	Body	NA	NA	0.458535	0.737445	0.608263	1.78884e-11	2.3891e-08
cg07608658	NM_001025930	TTLL3	TSS1500	chr3:9851476-9852171	Island	0.159263	0.0732364	-0.540154	1.88028e-11	2.49425e-08
cg06727242	NM_133509	RAD51B	Body	NA	NA	0.339312	0.799455	1.35611	1.88725e-11	2.49506e-08
cg11876705	NM_001146202	RASGRP4	TSS1500	NA	NA	0.67585	0.277918	-0.588787	1.89811e-11	2.50101e-08
cg07062476	NM_001167741	MTX3	5'UTR	chr5:79286584-79287134	Island	0.0984602	0.0313091	-0.682013	2.02937e-11	2.65613e-08
cg16108580	NA	NA	NA	NA	NA	0.436254	0.123964	-0.715845	2.07842e-11	2.71129e-08
cg15462862	NM_001113348	ECE1	Body	chr1:21671360-21672319	N_Shore	0.348212	0.1736	-0.501454	2.22641e-11	2.89472e-08
cg11834730	NM_001077261	NCOR2	Body	chr12:124941314-124941584	S_Shore	0.465822	0.170245	-0.634527	2.26038e-11	2.92919e-08
cg00986824	NM_139137	KCNC2	Body	chr12:75601081-75601752	Island	0.0552531	0.319382	4.78034	2.28084e-11	2.93632e-08
cg07548257	NM_001135911	PIK3IP1	Body	chr22:31686636-31687371	N_Shore	0.207358	0.0558091	-0.730856	2.29863e-11	2.94955e-08
cg01832605	NA	NA	NA	NA	NA	0.131222	0.0640364	-0.512	2.35323e-11	2.9903e-08
cg03016153	NM_001767	CD2	TSS200	NA	NA	0.474494	0.801764	0.689724	2.36641e-11	2.99735e-08
cg26338867	NM_014718	CLSTN3	TSS1500	NA	NA	0.408156	0.105409	-0.741743	2.35181e-11	2.9982e-08
cg06603074	NM_017742	ZCCHC2	Body	chr18:60193915-60194205	N_Shore	0.51485	0.122036	-0.762967	2.47168e-11	3.12062e-08
cg27353899	NM_018406	MUC4	Body	chr3:195488595-195489381	Island	0.20085	0.613409	2.05407	2.54101e-11	3.19787e-08
cg13985198	NM_001012	RPS8	Body	chr1:45241013-45241900	S_Shore	0.0695292	0.0261727	-0.623572	2.58581e-11	3.23352e-08
cg18718102	NM_006753	SURF6	TSS1500	chr9:136202804-136203247	S_Shore	0.153897	0.0721909	-0.530915	2.72275e-11	3.39396e-08
cg06680511	NA	NA	NA	NA	NA	0.102421	0.0447364	-0.563212	3.00392e-11	3.73259e-08
cg18806997	NM_001012	RPS8	Body	chr1:45241013-45241900	S_Shore	0.122416	0.0577182	-0.528508	3.16264e-11	3.91741e-08
cg15986919	NM_139172	TMEM190	TSS1500	chr19:55889005-55889476	N_Shore	0.265904	0.0897455	-0.662489	3.19401e-11	3.94382e-08
cg01017464	NM_001035006	RPL17	5'UTR	chr18:47018434-47018948	N_Shore	0.219423	0.0632273	-0.711848	3.24968e-11	3.99999e-08
cg02501120	NM_007188	ABCB8	Body	NA	NA	0.147512	0.0371	-0.748496	3.33203e-11	4.0758e-08
cg15344028	NM_012092	ICOS	5'UTR	NA	NA	0.437595	0.7798	0.782014	3.36456e-11	4.10281e-08
cg07461772	NM_018667	SMPD3	TSS1500	chr16:68480864-68482822	Island	0.12437	0.0343727	-0.723625	3.60233e-11	4.37916e-08
cg09900242	NA	NA	NA	NA	NA	0.129075	0.334927	1.59482	3.65232e-11	4.42622e-08
cg25298754	NM_005816	CD96	Body	NA	NA	0.63337	0.2001	-0.684071	3.82459e-11	4.57846e-08
cg20341504	NA	NA	NA	NA	NA	0.277624	0.0745091	-0.731619	3.80385e-11	4.58157e-08
cg12127149	NM_001376	DYNC1H1	Body	NA	NA	0.424336	0.7424	0.749556	3.93644e-11	4.68381e-08
cg07094298	NM_024309	TNIP2	Body	NA	NA	0.50243	0.0749727	-0.85078	4.1417e-11	4.91314e-08
cg27263998	NR_003512	INS-IGF2	Body	NA	NA	0.419202	0.135945	-0.675704	4.20847e-11	4.97732e-08
cg18886274	NA	NA	NA	NA	NA	0.787214	0.3574	-0.545994	4.29548e-11	5.0498e-08
cg15672749	NM_017777	MKS1	TSS1500	chr17:56296488-56296842	S_Shore	0.308098	0.0755	-0.754948	4.38914e-11	5.1445e-08
cg08868352	NM_198393	TEX14	5'UTR	chr17:56736754-56736962	Island	0.0635558	0.0290727	-0.542563	4.46698e-11	5.22016e-08
cg17694130	NA	NA	NA	NA	NA	0.548343	0.0602364	-0.890148	4.57943e-11	5.28861e-08
cg03881294	NA	NA	NA	NA	NA	0.480212	0.0888273	-0.815025	4.57099e-11	5.3101e-08
cg09187505	NA	NA	NA	NA	NA	0.473713	0.909373	0.919669	4.56794e-11	5.3223e-08
cg01952793	NM_007282	RNF13	TSS200	chr3:149530293-149531234	Island	0.0760788	0.0330818	-0.565164	4.85008e-11	5.58474e-08
cg14235811	NR_024872	SLC25A51	Body	chr9:37903630-37904475	N_Shore	0.24774	0.0663636	-0.732124	5.16739e-11	5.88114e-08
cg25631489	NM_024947	PHC3	TSS1500	chr3:169898946-169899626	S_Shore	0.542964	0.132345	-0.756254	5.39167e-11	6.11866e-08
cg07146104	NA	NA	NA	NA	NA	0.122661	0.0262182	-0.786255	5.52308e-11	6.24972e-08
cg01921126	NR_003512	INS-IGF2	Body	NA	NA	0.532898	0.229627	-0.569097	6.1313e-11	6.83941e-08
cg13564459	NM_006255	PRKCH	Body	NA	NA	0.450192	0.103818	-0.769391	6.10766e-11	6.85198e-08
cg22613968	NR_027042	MDS2	TSS1500	NA	NA	0.596829	0.2279	-0.618149	6.2119e-11	6.90969e-08
cg00588853	NR_002593	SLC7A5P1	Body	chr16:29624387-29625391	Island	0.0858796	0.0384091	-0.552757	6.56167e-11	7.27813e-08
cg10799846	NM_003898	SYNJ2	Body	chr6:158402072-158403444	S_Shelf	0.548331	0.863345	0.574497	6.79481e-11	7.5155e-08
cg18085400	NM_001122681	SH3BP2	TSS200	chr4:2794494-2794875	Island	0.163196	0.0239636	-0.853161	6.91052e-11	7.60066e-08
cg21536042	NM_003114	SPAG1	TSS1500	chr8:101170161-101170827	N_Shore	0.109065	0.0525364	-0.518304	6.90669e-11	7.61779e-08
cg10895687	NA	NA	NA	NA	NA	0.0634044	0.0286909	-0.547494	7.11783e-11	7.80681e-08
cg20376249	NM_018440	PAG1	Body	NA	NA	0.187337	0.0898	-0.52065	7.2363e-11	7.89265e-08
cg03357762	NM_006836	GCN1	TSS1500	chr12:120632222-120632784	S_Shore	0.296663	0.113664	-0.616859	7.38436e-11	8.00964e-08
cg08632388	NA	NA	NA	NA	NA	0.188551	0.0397727	-0.789062	7.78373e-11	8.41958e-08
cg17585031	NM_014238	KSR1	TSS200	NA	NA	0.54358	0.215973	-0.602684	8.10084e-11	8.73851e-08
cg09432154	NM_053002	MED12L	Body	NA	NA	0.694774	0.213327	-0.692955	8.33717e-11	8.96881e-08
cg03540731	NM_145256	LRRC25	5'UTR	NA	NA	0.0905009	0.0294091	-0.675041	8.75889e-11	9.37113e-08
cg07938480	NR_002169	OR1F2P	TSS1500	NA	NA	0.583764	0.191591	-0.671801	8.9464e-11	9.54573e-08
cg13803915	NM_198544	CENPS-CORT	TSS200	chr1:10490200-10491072	N_Shore	0.271512	0.0934545	-0.6558	9.28281e-11	9.87784e-08
cg16755924	NA	NA	NA	NA	NA	0.194758	0.505064	1.59329	9.5833e-11	1.017e-07
cg21011229	NA	NA	NA	NA	NA	0.0809602	0.0283636	-0.649659	9.62796e-11	1.01899e-07
cg01572979	NM_001831	CLU	3'UTR	NA	NA	0.0888133	0.0260818	-0.70633	9.70824e-11	1.02198e-07
cg16931076	NM_152441	FBXL14	Body	chr12:1702638-1704232	N_Shore	0.304965	0.1084	-0.64455	9.69642e-11	1.02348e-07
cg02696067	NM_001954	DDR1	TSS1500	chr6:30852102-30852676	N_Shore	0.642995	0.214736	-0.666037	1.0422e-10	1.08836e-07
cg07648207	NM_015476	TPGS2	Body	NA	NA	0.151653	0.0517091	-0.65903	1.07747e-10	1.11629e-07
cg06653052	NM_017914	C19orf24	TSS1500	chr19:1274469-1276358	Island	0.306472	0.0323909	-0.89431	1.07481e-10	1.11648e-07
cg03391464	NM_001142334	RBFOX1	Body	NA	NA	0.138284	0.0476091	-0.655715	1.12211e-10	1.15947e-07
cg02676175	NM_001002914	KCTD11	TSS1500	chr17:7253298-7253764	Island	0.589472	0.156373	-0.734724	1.14828e-10	1.1834e-07
cg03982355	NM_001002914	KCTD11	5'UTR	chr17:7254622-7255808	Island	0.170892	0.0476273	-0.721302	1.17162e-10	1.2043e-07
cg03716125	NA	NA	NA	NA	NA	0.513625	0.184382	-0.641018	1.18847e-10	1.21842e-07
cg26301297	NM_017615	NSMCE4A	TSS200	chr10:123734027-123734865	S_Shore	0.0607265	0.0245273	-0.596103	1.30012e-10	1.32597e-07
cg12143168	NR_026913	LY6E-DT	Body	chr8:144099456-144099731	Island	0.046977	0.0207818	-0.557617	1.34119e-10	1.36431e-07
cg01782132	NM_024816	RABEP2	Body	chr16:28936053-28937036	Island	0.150607	0.0722	-0.520607	1.35517e-10	1.37496e-07
cg05246522	NM_014238	KSR1	TSS200	NA	NA	0.641512	0.132982	-0.792706	1.37557e-10	1.39207e-07
cg20382675	NM_032682	FOXP1	5'UTR	NA	NA	0.452423	0.812655	0.796227	1.38592e-10	1.39535e-07
cg22863744	NM_001077261	NCOR2	Body	chr12:124941314-124941584	S_Shore	0.266042	0.0684818	-0.742591	1.40956e-10	1.41191e-07
cg10401367	NM_020239	CDC42SE1	5'UTR	chr1:151031767-151032352	N_Shore	0.110206	0.0234364	-0.787341	1.43708e-10	1.43581e-07
cg16205058	NM_080648	APEX1	Body	chr14:20922740-20924023	S_Shore	0.254689	0.0878818	-0.654945	1.44741e-10	1.43881e-07
cg12887711	NM_000163	GHR	Body	NA	NA	0.145288	0.0421455	-0.709917	1.44612e-10	1.44118e-07
cg22897141	NM_130799	MEN1	Body	chr11:64577277-64578349	Island	0.240778	0.0673909	-0.720112	1.4593e-10	1.44697e-07
cg04364726	NM_021269	ZNF708	1stExon	NA	NA	0.156216	0.299245	0.915589	1.47784e-10	1.46166e-07
cg22037209	NA	NA	NA	NA	NA	0.176665	0.400327	1.26602	1.48323e-10	1.46331e-07
cg24109860	NM_152468	TMC8	Body	chr17:76136513-76137184	Island	0.0889593	0.0369	-0.585204	1.51787e-10	1.49373e-07
cg14586373	NM_024681	KCTD17	TSS1500	chr22:37447689-37448238	N_Shore	0.42834	0.14	-0.673157	1.53525e-10	1.50705e-07
cg02124887	NA	NA	NA	NA	NA	0.198656	0.0631273	-0.682228	1.56905e-10	1.53639e-07
cg19599529	NM_004877	GMFG	3'UTR	NA	NA	0.197373	0.0754364	-0.617799	1.57979e-10	1.53923e-07
cg15686949	NA	NA	NA	NA	NA	0.657412	0.203518	-0.690425	1.58902e-10	1.54057e-07
cg19726840	NM_001018	RPS15	TSS200	chr19:1438287-1438869	N_Shore	0.100783	0.0385182	-0.617811	1.5859e-10	1.54136e-07
cg24586685	NA	NA	NA	NA	NA	0.546565	0.215518	-0.605686	1.61007e-10	1.55331e-07
cg01691182	NM_030796	VOPP1	Body	chr7:55639277-55640599	N_Shore	0.0674867	0.0306818	-0.545365	1.64689e-10	1.58495e-07
cg22268271	NM_175709	CBX7	Body	chr22:39548102-39548432	Island	0.032154	0.0153727	-0.521903	1.71213e-10	1.6437e-07
cg06111286	NM_002187	IL12B	TSS200	chr5:158758474-158758839	N_Shore	0.63916	0.311264	-0.513012	1.72726e-10	1.65418e-07
cg08354216	NA	NA	NA	NA	NA	0.412375	0.125682	-0.695225	1.77056e-10	1.68742e-07
cg16092645	NA	NA	NA	NA	NA	0.186553	0.0724455	-0.611663	1.79892e-10	1.71029e-07
cg12417466	NM_016300	ARPP21	TSS200	chr3:35680509-35681628	S_Shelf	0.471832	0.849273	0.799948	1.86078e-10	1.76058e-07
cg27117792	NA	NA	NA	NA	NA	0.605051	0.130073	-0.785022	1.91723e-10	1.80963e-07
cg08059678	NM_018052	VAC14	Body	NA	NA	0.370112	0.682818	0.844899	1.9348e-10	1.82183e-07
cg19297231	NM_001136126	CCND3	5'UTR	chr6:42016243-42016731	N_Shore	0.0685832	0.0244818	-0.643035	2.02669e-10	1.90379e-07
cg23016129	NM_172242	SPAG6	TSS200	chr10:22634000-22634862	Island	0.157166	0.444855	1.83047	2.10888e-10	1.97157e-07
cg10612237	NM_020338	ZMIZ1	TSS1500	chr10:80827070-80830537	Island	0.147251	0.0409545	-0.721873	2.10531e-10	1.97293e-07
cg04862097	NM_001122681	SH3BP2	5'UTR	chr4:2795139-2795467	Island	0.149783	0.0525545	-0.649129	2.18419e-10	2.0323e-07
cg01937809	NM_025079	ZC3H12A	Body	chr1:37939723-37940650	S_Shore	0.544643	0.110236	-0.797599	2.37456e-10	2.199e-07
cg20324356	NM_001014437	CARS	Body	chr11:3078142-3078984	N_Shore	0.0753867	0.0309545	-0.58939	2.39696e-10	2.21453e-07
cg03780271	NM_172208	TAPBP	Body	chr6:33281112-33281827	N_Shore	0.233991	0.0781	-0.666227	2.42715e-10	2.23715e-07
cg03317463	NM_018378	FBXL8	TSS1500	chr16:67193005-67193219	Island	0.0753726	0.0285182	-0.621637	2.49952e-10	2.28242e-07
cg04678793	NR_026913	LY6E-DT	Body	chr8:144099456-144099731	Island	0.0965434	0.0318273	-0.670332	2.49582e-10	2.28436e-07
cg15034393	NA	NA	NA	NA	NA	0.528132	0.137145	-0.74032	2.4907e-10	2.285e-07
cg15320998	NM_012256	ZNF212	TSS1500	chr7:148936618-148937330	N_Shore	0.486971	0.110836	-0.772396	2.53169e-10	2.29579e-07
cg03103888	NM_017905	TMCO3	5'UTR	chr13:114145965-114146172	S_Shore	0.525584	0.0756273	-0.856108	2.63581e-10	2.37922e-07
cg19795853	NA	NA	NA	NA	NA	0.180087	0.0619	-0.656277	2.71528e-10	2.43973e-07
cg24629356	NA	NA	NA	NA	NA	0.397792	0.108245	-0.727884	2.72266e-10	2.44078e-07
cg08384146	NM_019020	TBC1D16	Body	chr17:77983980-77984482	N_Shore	0.147554	0.0315091	-0.786457	2.74673e-10	2.45116e-07
cg19302996	NM_001080419	UNK	TSS200	chr17:73780846-73781308	N_Shore	0.182497	0.0574636	-0.685126	2.77123e-10	2.46742e-07
cg15838173	NM_173540	FUT11	Body	chr10:75531970-75532817	S_Shore	0.0523212	0.0215273	-0.588556	3.08925e-10	2.71365e-07
cg05784862	NM_014238	KSR1	TSS200	NA	NA	0.583182	0.129891	-0.777272	3.09725e-10	2.71461e-07
cg26435575	NA	NA	NA	NA	NA	0.63173	0.214909	-0.659809	3.41346e-10	2.97185e-07
cg26160564	NR_024455	LINC01134	Body	chr1:3824219-3824456	S_Shelf	0.562516	0.168982	-0.699596	3.44389e-10	2.99171e-07
cg25749318	NM_001029863	C6orf120	1stExon	chr6:170101662-170103059	Island	0.108515	0.0383	-0.647054	3.62029e-10	3.13109e-07
cg17398381	NM_031925	TMEM120A	TSS200	chr7:75623357-75624164	S_Shore	0.0949973	0.0463273	-0.512331	3.7335e-10	3.21485e-07
cg18827396	NM_017632	CDKN2AIP	3'UTR	chr4:184365197-184366435	S_Shelf	0.529989	0.798109	0.505896	3.88467e-10	3.3377e-07
cg24594979	NA	NA	NA	NA	NA	0.113203	0.0322909	-0.714751	3.941e-10	3.3787e-07
cg05033369	NM_032738	FCRLA	TSS1500	NA	NA	0.538226	0.0910727	-0.830791	3.9596e-10	3.38725e-07
cg02156899	NM_172168	NOXO1	Body	chr16:2028987-2030710	Island	0.792111	0.368827	-0.534374	3.99919e-10	3.40628e-07
cg02695349	NM_032016	STARD3NL	3'UTR	NA	NA	0.412819	0.863836	1.09253	3.99355e-10	3.40887e-07
cg19017142	NA	NA	NA	NA	NA	0.634539	0.192364	-0.696845	4.0442e-10	3.43716e-07
cg03155112	NM_022748	TNS3	5'UTR	NA	NA	0.316914	0.679536	1.14423	4.08039e-10	3.45297e-07
cg03658251	NM_032565	EBPL	TSS1500	chr13:50265224-50265598	S_Shore	0.0630991	0.0265636	-0.579017	4.07241e-10	3.45366e-07
cg24473500	NM_025154	SUN1	5'UTR	NA	NA	0.231568	0.0650364	-0.719148	4.24707e-10	3.57093e-07
cg06139259	NM_001127204	HMOX2	TSS1500	chr16:4526295-4526927	N_Shore	0.187482	0.0501	-0.732775	4.35545e-10	3.64644e-07
cg15084269	NM_005819	STX6	TSS1500	chr1:180991227-180991465	S_Shore	0.555788	0.128891	-0.768094	4.3698e-10	3.65067e-07
cg03942932	NA	NA	NA	NA	NA	0.28078	0.736591	1.62338	4.39487e-10	3.65606e-07
cg20017995	NM_133640	MED22	TSS1500	chr9:136214430-136215760	S_Shore	0.644598	0.279082	-0.567045	4.42951e-10	3.66932e-07
cg03763950	NM_021194	SLC30A1	Body	chr1:211751121-211753177	N_Shore	0.078015	0.0361182	-0.537036	4.42208e-10	3.67091e-07
cg03940153	NM_017951	SMPD4	TSS200	chr2:130938840-130940428	Island	0.145352	0.0706455	-0.513971	4.46731e-10	3.68509e-07
cg08292485	NM_001011878	DEFB121	Body	NA	NA	0.546004	0.141382	-0.741061	4.46206e-10	3.68851e-07
cg11377088	NM_024808	BORA	TSS1500	chr13:73301230-73302154	N_Shore	0.0534602	0.0214545	-0.598682	4.50948e-10	3.71208e-07
cg07023327	NM_015969	MRPS17	TSS1500	chr7:56019371-56019979	Island	0.0501504	0.0186091	-0.628935	4.59311e-10	3.76513e-07
cg11783264	NM_138422	ADAT3	TSS1500	chr19:1905106-1905835	N_Shore	0.121444	0.0408545	-0.663594	4.6151e-10	3.76743e-07
cg03548673	NM_001124	ADM	TSS1500	chr11:10326048-10326590	Island	0.118523	0.0361727	-0.694804	4.66391e-10	3.79151e-07
cg16492833	NM_032340	UQCC2	TSS1500	chr6:33679158-33679701	S_Shore	0.153044	0.0629636	-0.588592	4.69929e-10	3.81238e-07
cg26954138	NM_001168618	IFT46	TSS1500	NA	NA	0.330271	0.118436	-0.641396	4.7955e-10	3.8824e-07
cg20333014	NM_001031615	ALDH3B2	5'UTR	NA	NA	0.669009	0.275118	-0.588767	4.84163e-10	3.90366e-07
cg06957820	NM_003337	UBE2B	TSS1500	chr5:133707020-133707892	N_Shore	0.161152	0.0503455	-0.687591	4.87105e-10	3.91933e-07
cg13416901	NM_001042368	RALGDS	Body	chr9:136019708-136020134	N_Shore	0.0871947	0.0255909	-0.706508	4.90761e-10	3.94067e-07
cg22141781	NM_018838	NDUFA12	TSS200	chr12:95397382-95397611	S_Shore	0.127304	0.0485182	-0.618881	5.20649e-10	4.14674e-07
cg18865990	NM_001010875	SLC25A30	Body	NA	NA	0.15584	0.4512	1.89528	5.49229e-10	4.33917e-07
cg07266910	NM_152240	ZMAT3	Body	NA	NA	0.308615	0.744155	1.41127	5.46032e-10	4.3401e-07
cg06367459	NM_001136135	RPL28	Body	chr19:55895262-55898164	S_Shore	0.116332	0.0552455	-0.525105	5.48157e-10	4.34819e-07
cg00529958	NM_033132	ZIC5	TSS200	chr13:100620241-100624348	Island	0.164355	0.507909	2.09032	5.62248e-10	4.42422e-07
cg25100532	NM_016422	RNF141	TSS200	chr11:10562225-10562942	Island	0.0704478	0.0277091	-0.606672	5.61288e-10	4.42553e-07
cg01739327	NM_003797	EED	TSS1500	chr11:85955385-85955590	N_Shore	0.268169	0.0803545	-0.700359	5.74967e-10	4.51525e-07
cg02441467	NM_145806	ZNF511	Body	chr10:135122851-135123109	Island	0.0593611	0.0153909	-0.740724	5.89885e-10	4.61395e-07
cg23983173	NM_015497	TMEM87A	Body	chr15:42565452-42565791	N_Shore	0.252923	0.0970364	-0.61634	6.03604e-10	4.71187e-07
cg19038540	NM_001400	S1PR1	TSS1500	chr1:101701785-101702068	N_Shore	0.17264	0.0621545	-0.639976	6.07325e-10	4.73151e-07
cg03339537	NM_006186	NR4A2	Body	chr2:157185557-157186355	N_Shore	0.418381	0.832355	0.989463	6.09436e-10	4.73855e-07
cg01482790	NM_005968	HNRNPM	Body	chr19:8509635-8510765	S_Shelf	0.654442	0.293555	-0.551443	6.35134e-10	4.9092e-07
cg14359052	NM_001198	PRDM1	Body	NA	NA	0.480745	0.121673	-0.746908	6.34717e-10	4.91565e-07
cg05056497	NM_203418	RCAN1	TSS200	NA	NA	0.556919	0.116455	-0.790895	6.38582e-10	4.92615e-07
cg03044573	NR_003939	SNORD79	TSS1500	chr1:173837172-173837917	N_Shore	0.536105	0.222673	-0.584647	6.39905e-10	4.92668e-07
cg04625873	NM_001716	CXCR5	TSS200	NA	NA	0.585394	0.235391	-0.597893	6.4246e-10	4.93667e-07
cg08640824	NM_003036	SKI	Body	chr1:2158212-2161173	S_Shore	0.516298	0.0875273	-0.830471	6.48728e-10	4.9751e-07
cg05859264	NM_002754	MAPK13	TSS1500	chr6:36098039-36098621	N_Shore	0.650397	0.304909	-0.531196	6.5118e-10	4.98417e-07
cg09011597	NM_006191	PA2G4	TSS1500	chr12:56497868-56499047	N_Shore	0.0681761	0.0297364	-0.56383	6.56741e-10	5.00721e-07
cg24375364	NM_133463	AMZ1	3'UTR	chr7:2758004-2758257	N_Shelf	0.447981	0.863755	0.928104	6.59051e-10	5.01508e-07
cg05352838	NM_001014840	CUTA	3'UTR	chr6:33385678-33386262	N_Shore	0.778293	0.348118	-0.552716	6.62112e-10	5.02863e-07
cg13917964	NM_002047	GARS	Body	chr7:30634124-30635058	S_Shore	0.160093	0.0577182	-0.639471	6.82423e-10	5.17289e-07
cg04865976	NA	NA	NA	NA	NA	0.257184	0.0772182	-0.699755	7.08695e-10	5.35137e-07
cg14028400	NA	NA	NA	NA	NA	0.369532	0.645909	0.747912	7.28133e-10	5.4876e-07
cg11942059	NM_001851	COL9A1	TSS1500	NA	NA	0.620741	0.267218	-0.569517	7.41839e-10	5.56951e-07
cg02929961	NM_018688	BIN3	Body	chr8:22526298-22526757	N_Shore	0.741846	0.362127	-0.511857	8.11245e-10	6.06739e-07
cg14579997	NM_006813	PNRC1	Body	chr6:89790137-89791781	S_Shore	0.109068	0.0422455	-0.612669	8.13316e-10	6.07131e-07
cg03102729	NM_012084	GLUD2	1stExon	chrX:120181326-120181970	Island	0.370042	0.607455	0.641585	8.2955e-10	6.18074e-07
cg08848172	NM_003930	SKAP2	TSS200	chr7:26903869-26904753	Island	0.0624805	0.0250636	-0.598857	8.34852e-10	6.20847e-07
cg23371746	NM_152380	TBX15	TSS1500	chr1:119531991-119532196	S_Shore	0.0976212	0.5066	4.18944	8.66468e-10	6.41927e-07
cg18297437	NM_003412	ZIC1	Body	chr3:147131066-147131333	Island	0.146888	0.499582	2.4011	8.73381e-10	6.42201e-07
cg21661768	NA	NA	NA	NA	NA	0.322783	0.678227	1.10119	8.6905e-10	6.42627e-07
cg10699171	NA	NA	NA	NA	NA	0.613748	0.176836	-0.711875	8.71389e-10	6.43146e-07
cg13650535	NA	NA	NA	NA	NA	0.227252	0.0724636	-0.681131	8.73177e-10	6.43256e-07
cg07949433	NR_003013	SCARNA16	TSS1500	chr17:75084622-75085085	Island	0.138757	0.0507818	-0.634022	8.79766e-10	6.45687e-07
cg19246654	NM_001113239	HIPK2	Body	NA	NA	0.567875	0.864045	0.521541	8.81754e-10	6.45939e-07
cg10667810	NM_007145	ZNF146	TSS1500	chr19:36705433-36706262	N_Shore	0.51757	0.252345	-0.512442	8.86154e-10	6.47953e-07
cg16300030	NM_002118	HLA-DMB	TSS200	NA	NA	0.182987	0.0437	-0.761185	8.91979e-10	6.51001e-07
cg22859679	NR_024061	LOH12CR2	Body	chr12:12509911-12510428	N_Shore	0.168512	0.0575909	-0.658238	9.03441e-10	6.56924e-07
cg04690998	NM_013321	SNX8	Body	NA	NA	0.474957	0.124	-0.738924	9.28253e-10	6.72475e-07
cg07577569	NM_032221	CHD6	5'UTR	chr20:40246345-40247841	N_Shore	0.0692124	0.0320091	-0.537524	9.57289e-10	6.87171e-07
cg08738403	NM_001130720	AHCYL2	Body	NA	NA	0.220758	0.0409909	-0.814317	9.61059e-10	6.88618e-07
cg00689225	NM_020529	NFKBIA	Body	chr14:35873047-35873990	N_Shore	0.628907	0.136364	-0.783174	9.74291e-10	6.9556e-07
cg01979157	NM_003036	SKI	1stExon	chr1:2158212-2161173	Island	0.200328	0.0304909	-0.847795	9.73096e-10	6.95973e-07
cg11201447	NR_003367	PVT1	Body	chr8:128806081-128806899	S_Shore	0.41296	0.0731	-0.822985	1.00131e-09	7.12258e-07
cg04659467	NM_145239	PRRT2	TSS1500	chr16:29823163-29823906	N_Shore	0.111888	0.0382727	-0.657936	1.02412e-09	7.25859e-07
cg16694480	NM_004930	CAPZB	Body	NA	NA	0.163873	0.719445	3.39027	1.03205e-09	7.28845e-07
cg14513281	NM_053056	CCND1	TSS1500	chr11:69451136-69458596	Island	0.0490292	0.0176818	-0.639362	1.04008e-09	7.31881e-07
cg19872095	NM_025079	ZC3H12A	Body	chr1:37939723-37940650	S_Shore	0.50953	0.199282	-0.608891	1.03889e-09	7.32358e-07
cg15427004	NM_002468	MYD88	TSS200	chr3:38179857-38180689	Island	0.110541	0.0385818	-0.650972	1.07038e-09	7.49179e-07
cg18422055	NM_015184	PLCL2	5'UTR	NA	NA	0.429697	0.745545	0.735048	1.13234e-09	7.88325e-07
cg02734661	NM_012171	TSPAN17	Body	chr5:176074138-176074623	S_Shore	0.063277	0.0277	-0.562242	1.13826e-09	7.91043e-07
cg15829826	NM_031904	FRMD8	TSS200	chr11:65153726-65154606	Island	0.0722593	0.0241364	-0.665976	1.15284e-09	7.99761e-07
cg17644208	NM_004036	ADCY3	TSS1500	chr2:25142472-25143689	N_Shore	0.239421	0.0631091	-0.73641	1.16132e-09	8.04225e-07
cg10156217	NM_001663	ARF6	3'UTR	chr14:50359340-50360797	S_Shore	0.362123	0.0731909	-0.797884	1.17239e-09	8.10461e-07
cg20674424	NM_001967	EIF4A2	Body	chr3:186500738-186502048	S_Shore	0.142794	0.0488545	-0.657866	1.2785e-09	8.73057e-07
cg02833725	NM_030980	ISG20L2	1stExon	chr1:156698111-156698916	N_Shore	0.564119	0.251809	-0.553625	1.29215e-09	8.77797e-07
cg16582517	NM_003670	BHLHE40	3'UTR	chr3:5024760-5024967	S_Shore	0.330281	0.0820182	-0.751671	1.31013e-09	8.88472e-07
cg13216025	NM_032937	ARRDC1-AS1	5'UTR	chr9:140512892-140513420	N_Shore	0.0648522	0.0217818	-0.664131	1.3213e-09	8.92963e-07
cg04864807	NA	NA	NA	NA	NA	0.254314	0.824382	2.24159	1.34778e-09	9.09298e-07
cg12485727	NA	NA	NA	NA	NA	0.614129	0.207918	-0.661442	1.38654e-09	9.3224e-07
cg05895091	NA	NA	NA	NA	NA	0.164819	0.0483091	-0.706895	1.42818e-09	9.586e-07
cg05762671	NM_001100915	KCTD19	Body	NA	NA	0.658524	0.231745	-0.648083	1.43306e-09	9.60229e-07
cg09929164	NM_022167	XYLT2	TSS1500	chr17:48422989-48423564	Island	0.039615	0.0170818	-0.568805	1.43773e-09	9.61719e-07
cg22868961	NA	NA	NA	NA	NA	0.675887	0.325427	-0.518518	1.49365e-09	9.97424e-07
cg03906434	NA	NA	NA	NA	NA	0.225198	0.575955	1.55754	1.53126e-09	1.0208e-06
cg13484608	NM_145109	MAP2K3	Body	chr17:21187552-21188443	S_Shelf	0.097085	0.0246091	-0.74652	1.55106e-09	1.0305e-06
cg11682697	NM_003713	PLPP3	Body	NA	NA	0.304627	0.136473	-0.552	1.55644e-09	1.03059e-06
cg24674445	NA	NA	NA	NA	NA	0.0983973	0.0297091	-0.69807	1.55472e-09	1.03119e-06
cg04616529	NM_015226	CLEC16A	Body	NA	NA	0.418887	0.851782	1.03344	1.56076e-09	1.03171e-06
cg27248887	NM_001959	EEF1B2	Body	chr2:207023910-207024981	S_Shore	0.492096	0.202245	-0.589012	1.56797e-09	1.03473e-06
cg04266460	NM_003745	SOCS1	Body	chr16:11348541-11350803	Island	0.0697841	0.0181	-0.740628	1.62366e-09	1.06969e-06
cg02483101	NA	NA	NA	NA	NA	0.563892	0.185027	-0.671875	1.63236e-09	1.07362e-06
cg26328687	NM_032427	MAML2	TSS1500	NA	NA	0.43164	0.108891	-0.747727	1.64208e-09	1.07641e-06
cg24136205	NM_033132	ZIC5	TSS200	chr13:100620241-100624348	Island	0.209832	0.485055	1.31163	1.65027e-09	1.07997e-06
cg23490246	NM_020760	HECW2	5'UTR	NA	NA	0.527501	0.190582	-0.638708	1.68245e-09	1.0992e-06
cg11114757	NM_001166	BIRC2	TSS1500	chr11:102217574-102218247	N_Shore	0.505912	0.173873	-0.656319	1.74608e-09	1.13888e-06
cg24411972	NM_173572	CFAP46	Body	chr10:134755663-134756852	N_Shore	0.637629	0.272718	-0.572293	1.85497e-09	1.2039e-06
cg24610274	NM_001122837	SLC50A1	TSS1500	chr1:155108007-155108611	N_Shore	0.0790053	0.0319909	-0.595079	1.89418e-09	1.22328e-06
cg24487489	NM_001014840	CUTA	3'UTR	chr6:33385678-33386262	N_Shore	0.737764	0.259791	-0.647867	1.89137e-09	1.22348e-06
cg18058230	NM_001161561	TNIK	Body	NA	NA	0.425175	0.813382	0.913051	1.93014e-09	1.24446e-06
cg14861221	NM_007159	SLMAP	TSS200	chr3:57741925-57742990	S_Shore	0.116278	0.0516909	-0.555454	1.94273e-09	1.24847e-06
cg03876424	NM_001077594	EXOC3L4	Body	chr14:103568365-103571499	Island	0.182906	0.0833727	-0.544178	1.95278e-09	1.25289e-06
cg03990903	NM_031449	ZMIZ2	5'UTR	chr7:44788714-44789119	Island	0.128464	0.0378	-0.705753	1.97916e-09	1.25952e-06
cg22583148	NR_033204	HOXB-AS3	Body	chr17:46673532-46674181	Island	0.117367	0.4331	2.69013	1.968e-09	1.26059e-06
cg16541275	NM_020761	RPTOR	Body	chr17:78818440-78818696	S_Shelf	0.427935	0.698373	0.631958	1.9722e-09	1.26122e-06
cg05242915	NA	NA	NA	NA	NA	0.802158	0.358909	-0.552571	2.03149e-09	1.28865e-06
cg24327132	NM_002654	PKM	5'UTR	chr15:72522131-72524238	N_Shore	0.646884	0.0950636	-0.853044	2.04377e-09	1.29434e-06
cg08848847	NM_001160167	PRR5L	5'UTR	chr11:36397926-36399398	S_Shore	0.2101	0.0629	-0.700619	2.05841e-09	1.30151e-06
cg19921353	NM_002121	HLA-DPB1	TSS200	NA	NA	0.114758	0.0421636	-0.632585	2.07222e-09	1.30814e-06
cg24003508	NM_001160125	KLF6	Body	chr10:3823789-3824017	S_Shore	0.392904	0.0619091	-0.842432	2.10379e-09	1.32381e-06
cg03852551	NM_001145121	TCP10L2	3'UTR	NA	NA	0.262865	0.100682	-0.616982	2.10121e-09	1.32431e-06
cg17417600	NM_198066	GNPNAT1	TSS200	chr14:53257664-53258400	S_Shore	0.193771	0.0541455	-0.72057	2.12994e-09	1.33599e-06
cg24874254	NM_001198	PRDM1	Body	NA	NA	0.534702	0.1453	-0.72826	2.14796e-09	1.343e-06
cg18304704	NM_015016	MAST3	Body	chr19:18228622-18229284	S_Shore	0.200037	0.0651	-0.67456	2.18084e-09	1.35923e-06
cg22130205	NA	NA	NA	NA	NA	0.205736	0.0567818	-0.724007	2.1926e-09	1.36439e-06
cg17652174	NM_001009905	B3GNTL1	Body	chr17:81009245-81009999	N_Shore	0.315233	0.0917909	-0.708815	2.30968e-09	1.42819e-06
cg17617491	NM_052847	GNG7	5'UTR	chr19:2607725-2607967	Island	0.555326	0.197173	-0.644942	2.34726e-09	1.44687e-06
cg22372709	NA	NA	NA	NA	NA	0.135579	0.0664273	-0.510047	2.42078e-09	1.47827e-06
cg05560697	NM_005471	GNPDA1	TSS1500	chr5:141392360-141392587	S_Shore	0.124883	0.0369727	-0.703942	2.4252e-09	1.47867e-06
cg15931850	NA	NA	NA	NA	NA	0.387588	0.0747182	-0.807222	2.41887e-09	1.4794e-06
cg20703928	NM_001004722	NCK2	5'UTR	chr2:106361032-106362218	S_Shelf	0.677027	0.230082	-0.660159	2.44605e-09	1.48676e-06
cg24686918	NA	NA	NA	NA	NA	0.617012	0.153755	-0.750808	2.45791e-09	1.49166e-06
cg11236429	NR_003679	HAND2-AS1	Body	chr4:174459200-174460054	Island	0.0320965	0.296145	8.22673	2.46497e-09	1.49364e-06
cg03834909	NR_027271	CIRBP-AS1	TSS200	chr19:1265854-1269943	S_Shore	0.184845	0.0741636	-0.59878	2.48407e-09	1.50289e-06
cg16830870	NM_018838	NDUFA12	TSS200	chr12:95397382-95397611	Island	0.0862142	0.0379455	-0.55987	2.51435e-09	1.51887e-06
cg05329888	NM_001113755	TYMP	5'UTR	chr22:50963608-50970768	Island	0.159675	0.0218182	-0.863359	2.54261e-09	1.53123e-06
cg09631059	NM_001025234	TSPAN4	Body	chr11:858575-858932	N_Shore	0.7439	0.242355	-0.674211	2.54243e-09	1.53347e-06
cg13431037	NA	NA	NA	NA	NA	0.599758	0.237091	-0.604689	2.58596e-09	1.55257e-06
cg04369964	NM_005528	DNAJC4	TSS200	chr11:63997662-63998412	N_Shore	0.131896	0.0577727	-0.561984	2.60276e-09	1.5579e-06
cg14929207	NM_144683	DHRS13	TSS1500	chr17:27229475-27230178	S_Shore	0.136088	0.0617909	-0.545951	2.61844e-09	1.5649e-06
cg03409548	NM_201403	MOB3C	TSS200	chr1:47082016-47082526	S_Shore	0.15436	0.0768636	-0.50205	2.65431e-09	1.57913e-06
cg07388156	NA	NA	NA	NA	NA	0.159696	0.376436	1.35721	2.6655e-09	1.58338e-06
cg15577373	NA	NA	NA	NA	NA	0.263373	0.516955	0.962819	2.72614e-09	1.61696e-06
cg07548580	NA	NA	NA	NA	NA	0.0957929	0.0399182	-0.583287	2.80238e-09	1.65717e-06
cg05821464	NM_015124	GRAMD4	Body	chr22:47058870-47059114	N_Shore	0.66059	0.272291	-0.587807	2.82661e-09	1.66149e-06
cg17729941	NM_001024210	S100A13	TSS1500	chr1:153606177-153606974	S_Shore	0.552118	0.202564	-0.633115	2.81482e-09	1.66203e-06
cg23072161	NA	NA	NA	NA	NA	0.169593	0.0490818	-0.71059	2.82403e-09	1.66247e-06
cg03407547	NM_001002914	KCTD11	1stExon	chr17:7254622-7255808	Island	0.0399009	0.0192364	-0.517896	2.82057e-09	1.66292e-06
cg26744362	NM_007279	U2AF2	Body	chr19:56170506-56170708	N_Shore	0.560503	0.162391	-0.710276	2.89744e-09	1.69804e-06
cg01143579	NM_006497	HIC1	TSS1500	chr17:1952919-1962328	Island	0.0864204	0.0345273	-0.600473	2.91452e-09	1.70297e-06
cg03715846	NA	NA	NA	NA	NA	0.383614	0.717191	0.869563	2.94212e-09	1.714e-06
cg07895684	NM_002468	MYD88	TSS200	chr3:38179857-38180689	N_Shore	0.0891885	0.0430091	-0.517773	2.93908e-09	1.71477e-06
cg08861115	NM_019618	IL36G	TSS1500	NA	NA	0.663156	0.287636	-0.566261	2.97647e-09	1.73143e-06
cg22742943	NM_020151	STARD7	Body	chr2:96873851-96874824	N_Shore	0.174827	0.0493364	-0.717798	2.98388e-09	1.73318e-06
cg00390724	NA	NA	NA	NA	NA	0.29382	0.774882	1.63726	3.0538e-09	1.76856e-06
cg10603156	NM_018027	FRMD4A	Body	NA	NA	0.610404	0.219355	-0.640641	3.15247e-09	1.82033e-06
cg10911160	NM_014350	TNFAIP8	1stExon	chr5:118691401-118691759	S_Shore	0.0944186	0.0461273	-0.51146	3.20438e-09	1.84759e-06
cg07121795	NM_001145277	NECAP2	Body	chr1:16766998-16767803	S_Shore	0.494265	0.210245	-0.574631	3.2454e-09	1.86576e-06
cg11630632	NM_014887	N4BP2L2	TSS1500	NA	NA	0.379404	0.120091	-0.683474	3.2863e-09	1.88376e-06
cg27270541	NM_001159323	PLA2G4C	TSS200	NA	NA	0.239335	0.0597455	-0.750369	3.2945e-09	1.88571e-06
cg08063160	NM_001137550	LRRFIP1	Body	NA	NA	0.434842	0.119291	-0.725668	3.30594e-09	1.8895e-06
cg19303682	NM_005755	EBI3	TSS1500	NA	NA	0.144213	0.0693727	-0.518957	3.32325e-09	1.89664e-06
cg00874230	NM_001168325	TESC	TSS1500	chr12:117536290-117537421	S_Shore	0.0899283	0.0433091	-0.518404	3.38411e-09	1.92857e-06
cg07281879	NR_023920	WT1-AS	Body	chr11:32459422-32459878	Island	0.141804	0.476873	2.36291	3.41208e-09	1.93887e-06
cg13255056	NM_144641	PPM1M	TSS200	chr3:52279601-52280140	Island	0.167764	0.0555364	-0.668961	3.41075e-09	1.94093e-06
cg10586546	NM_033177	GPANK1	TSS1500	chr6:31632815-31634093	S_Shore	0.26053	0.109764	-0.578691	3.46091e-09	1.95812e-06
cg22853140	NM_001166579	AANAT	5'UTR	NA	NA	0.0858434	0.0346273	-0.596623	3.49463e-09	1.97152e-06
cg19757631	NM_003132	SRM	Body	chr1:11119030-11120634	N_Shore	0.8219	0.350255	-0.573848	3.49103e-09	1.97232e-06
cg23378546	NA	NA	NA	NA	NA	0.322724	0.0545091	-0.831097	3.51685e-09	1.98121e-06
cg06487986	NM_016831	PER3	TSS1500	chr1:7843460-7843693	Island	0.0528761	0.0239818	-0.546453	3.57392e-09	2.0076e-06
cg15936385	NM_004356	CD81	Body	chr11:2406711-2406927	N_Shore	0.679453	0.313282	-0.538921	3.57012e-09	2.00834e-06
cg19083871	NA	NA	NA	NA	NA	0.075731	0.0148909	-0.803371	3.63075e-09	2.0337e-06
cg07048504	NA	NA	NA	NA	NA	0.205631	0.756309	2.67799	3.65374e-09	2.04366e-06
cg20684110	NM_032804	ADO	1stExon	chr10:64564435-64565818	Island	0.374158	0.0704	-0.811844	3.66159e-09	2.04514e-06
cg01947415	NM_025154	SUN1	3'UTR	chr7:915753-916644	N_Shelf	0.104705	0.0363818	-0.652531	3.6943e-09	2.05174e-06
cg04299274	NM_014238	KSR1	TSS1500	NA	NA	0.625543	0.2512	-0.598429	3.68945e-09	2.05194e-06
cg23619365	NA	NA	NA	NA	NA	0.122212	0.526655	3.30934	3.68905e-09	2.05463e-06
cg02105002	NM_183239	GSTO2	5'UTR	chr10:106028542-106029047	Island	0.111001	0.0180636	-0.837266	3.68698e-09	2.0564e-06
cg06792538	NA	NA	NA	NA	NA	0.762512	0.375327	-0.507776	3.7238e-09	2.0652e-06
cg00924143	NA	NA	NA	NA	NA	0.113761	0.357591	2.14335	3.7371e-09	2.06965e-06
cg18339788	NA	NA	NA	NA	NA	0.145272	0.3463	1.38381	3.75066e-09	2.07423e-06
cg14453641	NM_000028	AGL	TSS1500	chr1:100315420-100316009	N_Shore	0.0566504	0.0277091	-0.510876	3.9013e-09	2.15148e-06
cg00657095	NM_006238	PPARD	TSS1500	chr6:35310150-35310686	N_Shore	0.124896	0.0458273	-0.633075	3.9173e-09	2.15728e-06
cg25337795	NM_001031617	COX19	5'UTR	chr7:1014698-1015239	Island	0.0914867	0.0123727	-0.864759	4.06753e-09	2.23063e-06
cg04831406	NM_001031617	COX19	1stExon	chr7:1014698-1015239	Island	0.0805796	0.0126909	-0.842505	4.14345e-09	2.26278e-06
cg07724466	NM_016061	YPEL5	TSS1500	chr2:30369311-30370921	N_Shore	0.297065	0.102036	-0.656518	4.23541e-09	2.30658e-06
cg07195577	NM_138463	TLCD1	Body	chr17:27052941-27054084	N_Shore	0.220736	0.0632455	-0.71348	4.2719e-09	2.32323e-06
cg05987698	NM_024827	HDAC11	TSS1500	chr3:13520912-13521319	Island	0.0885814	0.0192	-0.78325	4.33404e-09	2.35377e-06
cg27563174	NM_003367	USF2	Body	chr19:35760457-35760865	Island	0.241167	0.0474545	-0.80323	4.44763e-09	2.40879e-06
cg17163363	NM_001004052	OR52B2	TSS1500	NA	NA	0.237724	0.0774909	-0.67403	4.447e-09	2.41178e-06
cg23936476	NM_018476	BEX1	1stExon	chrX:102318601-102319304	Island	0.247099	0.487227	0.971789	4.50659e-09	2.42733e-06
cg23241201	NM_145288	ZNF296	TSS1500	chr19:45579321-45580018	Island	0.233734	0.0824818	-0.647112	4.53155e-09	2.4341e-06
cg08113913	NM_207310	CCDC74B	1stExon	chr2:130902120-130902704	Island	0.0821177	0.0285364	-0.652494	4.59506e-09	2.46148e-06
cg25529393	NM_003535	HIST1H3J	1stExon	chr6:27858166-27858564	Island	0.190768	0.0455091	-0.761443	4.58901e-09	2.46159e-06
cg10671066	NM_052931	SLAMF6	Body	NA	NA	0.211673	0.0481727	-0.77242	4.62902e-09	2.47629e-06
cg15526535	NM_001066	TNFRSF1B	Body	NA	NA	0.740397	0.3043	-0.589004	4.68749e-09	2.50416e-06
cg20915029	NM_014985	CEP152	5'UTR	chr15:49102731-49102938	N_Shore	0.0660009	0.0327636	-0.503588	4.72201e-09	2.51235e-06
cg06972019	NM_001428	ENO1	5'UTR	chr1:8938098-8939409	N_Shore	0.142996	0.0508727	-0.644238	4.71917e-09	2.51424e-06
cg12658374	NM_001143968	ARL5C	TSS1500	chr17:37321482-37322099	S_Shore	0.507282	0.792927	0.563089	4.77851e-09	2.53553e-06
cg09318248	NR_015427	BRD3OS	Body	chr9:136890463-136891448	Island	0.0661947	0.0306727	-0.536629	4.82808e-09	2.55838e-06
cg18281939	NM_005779	LHFPL2	3'UTR	NA	NA	0.510337	0.825573	0.617701	5.10586e-09	2.68744e-06
cg18643093	NM_004033	ANXA6	Body	NA	NA	0.268401	0.0708091	-0.736182	5.12888e-09	2.69594e-06
cg10361659	NM_001142279	RNASEH2B	TSS1500	chr13:51483747-51484591	N_Shore	0.497649	0.831882	0.671625	5.14792e-09	2.70233e-06
cg15777760	NM_017458	MVP	5'UTR	chr16:29826662-29828302	S_Shelf	0.417112	0.0817455	-0.804021	5.28531e-09	2.75603e-06
cg22234930	NM_002654	PKM	5'UTR	chr15:72522131-72524238	N_Shelf	0.635599	0.114745	-0.819469	5.34431e-09	2.77207e-06
cg09796457	NM_015322	FEM1B	Body	chr15:68569974-68571058	S_Shore	0.238009	0.111936	-0.529697	5.48788e-09	2.83904e-06
cg19519964	NM_152386	SGPP2	Body	chr2:223288922-223290013	Island	0.143494	0.0429182	-0.700906	5.68143e-09	2.9276e-06
cg15506609	NM_152739	HOXA9	TSS1500	chr7:27203915-27206462	Island	0.274076	0.702145	1.56186	5.71165e-09	2.93547e-06
cg09909069	NA	NA	NA	NA	NA	0.316511	0.729718	1.30551	5.7864e-09	2.97e-06
cg07604732	NR_024436	CLEC19A	TSS1500	NA	NA	0.659171	0.189218	-0.712945	5.80473e-09	2.97551e-06
cg07703610	NM_003077	SMARCD2	Body	chr17:61919659-61920656	N_Shore	0.0618664	0.0289818	-0.531542	5.83091e-09	2.98504e-06
cg19646538	NM_018026	PACS1	TSS1500	chr11:65837254-65838649	Island	0.195643	0.0828545	-0.576502	5.8419e-09	2.98677e-06
cg16755038	NA	NA	NA	NA	NA	0.178508	0.0708818	-0.602921	5.92269e-09	3.02021e-06
cg22418360	NM_080678	UBE2F	5'UTR	chr2:238875131-238876327	S_Shore	0.110875	0.0442545	-0.600862	5.93044e-09	3.02024e-06
cg08114476	NM_133436	ASNS	TSS1500	chr7:97501183-97501919	Island	0.0449681	0.0197909	-0.55989	6.10071e-09	3.09491e-06
cg00973732	NM_001142864	PIEZO1	Body	chr16:88803802-88804112	Island	0.0537858	0.0205	-0.618859	6.12397e-09	3.10271e-06
cg23125542	NM_020811	CARNS1	1stExon	chr11:67182965-67183393	Island	0.0337788	0.0129091	-0.617834	6.27762e-09	3.16829e-06
cg18395558	NM_001080997	RTBDN	Body	chr19:12939415-12939662	Island	0.0894018	0.0290545	-0.675012	6.4369e-09	3.2445e-06
cg18866212	NA	NA	NA	NA	NA	0.637278	0.224636	-0.647506	6.66891e-09	3.35714e-06
cg01620757	NM_001001683	MED11	Body	chr17:4634567-4635230	Island	0.0892708	0.0323	-0.63818	6.68399e-09	3.36042e-06
cg09076540	NA	NA	NA	NA	NA	0.207553	0.347173	0.672694	6.80022e-09	3.41013e-06
cg01441359	NM_000365	TPI1	TSS1500	chr12:6976392-6977393	N_Shore	0.0952	0.0341636	-0.641138	7.17538e-09	3.57542e-06
cg08857221	NM_025079	ZC3H12A	Body	chr1:37939723-37940650	S_Shore	0.559281	0.225018	-0.597665	7.22918e-09	3.59767e-06
cg21636432	NM_003137	SRPK1	Body	chr6:35888479-35889060	N_Shore	0.108119	0.0241727	-0.776424	7.35595e-09	3.64689e-06
cg07340007	NM_003576	STK24	3'UTR	NA	NA	0.366726	0.774291	1.11136	7.4549e-09	3.68663e-06
cg01565703	NM_145726	TRAF3	5'UTR	NA	NA	0.28036	0.0906818	-0.676552	7.53763e-09	3.72286e-06
cg01750611	NM_004295	TRAF4	Body	chr17:27070538-27071570	S_Shore	0.121727	0.0512727	-0.578791	7.76453e-09	3.81096e-06
cg03433699	NM_001142798	C17orf49	TSS1500	chr17:6917569-6918539	N_Shore	0.224752	0.0614727	-0.726487	7.7608e-09	3.81389e-06
cg21514227	NM_000435	NOTCH3	Body	chr19:15288314-15288911	Island	0.0632389	0.0292273	-0.537828	7.89599e-09	3.86582e-06
cg09121269	NM_006029	PNMA1	TSS1500	chr14:74180518-74181264	S_Shore	0.204827	0.0590273	-0.711818	7.95191e-09	3.88834e-06
cg00869668	NM_145350	SCARF1	1stExon	chr17:1546742-1547324	S_Shore	0.467384	0.760245	0.626597	8.01099e-09	3.91236e-06
cg09572125	NM_006772	SYNGAP1	Body	NA	NA	0.284612	0.871873	2.06338	8.07276e-09	3.93763e-06
cg03078551	NA	NA	NA	NA	NA	0.236101	0.0424455	-0.820223	8.12195e-09	3.95181e-06
cg11584921	NA	NA	NA	NA	NA	0.0940788	0.0389273	-0.586227	8.22547e-09	3.99228e-06
cg15410903	NM_183239	GSTO2	1stExon	chr10:106028542-106029047	Island	0.13095	0.0214727	-0.836024	8.22401e-09	3.99651e-06
cg26175661	NM_001136025	PLS3	TSS1500	NA	NA	0.78731	0.354618	-0.549582	8.30899e-09	4.02784e-06
cg24605325	NA	NA	NA	NA	NA	0.512483	0.125	-0.75609	8.57508e-09	4.14659e-06
cg23089272	NM_152597	FSIP1	Body	NA	NA	0.657555	0.220273	-0.665012	8.87937e-09	4.28319e-06
cg16620032	NM_005282	GPR4	5'UTR	chr19:46094334-46095111	S_Shore	0.222661	0.0610182	-0.725959	9.12155e-09	4.38385e-06
cg12795893	NM_001686	ATP5B	Body	chr12:57039047-57039823	N_Shore	0.457311	0.148355	-0.675593	9.11852e-09	4.38776e-06
cg01636650	NM_015873	VILL	Body	chr3:38040289-38040535	Island	0.391896	0.0666273	-0.829988	9.2021e-09	4.41176e-06
cg08742502	NM_001198	PRDM1	Body	NA	NA	0.573562	0.141927	-0.752551	9.29032e-09	4.44862e-06
cg02283691	NM_001105570	NUDT19	TSS1500	chr19:33182609-33183562	N_Shore	0.170809	0.0506727	-0.703337	9.32331e-09	4.45898e-06
cg04383058	NM_004910	PITPNM1	TSS1500	chr11:67275067-67276431	N_Shore	0.500425	0.103836	-0.792504	9.40856e-09	4.49428e-06
cg14325436	NM_024527	ABHD8	Body	chr19:17404959-17405377	Island	0.746945	0.191973	-0.74299	9.59987e-09	4.56899e-06
cg17390562	NM_003379	EZR	Body	chr6:159239081-159240775	N_Shore	0.237409	0.0912818	-0.615508	9.81763e-09	4.6389e-06
cg24082526	NR_000020	SNORD33	TSS1500	chr19:49991240-49991518	S_Shore	0.721335	0.250764	-0.652362	9.79611e-09	4.63989e-06
cg10878896	NM_004077	CS	TSS1500	chr12:56693680-56694345	S_Shore	0.0602407	0.0223273	-0.629366	9.81483e-09	4.64316e-06
cg13649209	NA	NA	NA	NA	NA	0.439507	0.191909	-0.563354	9.79388e-09	4.64444e-06
cg18459957	NM_001006938	TCEAL6	5'UTR	chrX:101397305-101397514	N_Shore	0.22568	0.567273	1.51362	9.84262e-09	4.64511e-06
cg18680181	NM_014672	KIAA0391	Body	NA	NA	0.760465	0.3241	-0.573813	9.87191e-09	4.64776e-06
cg27011060	NM_001127612	PAX6	Body	chr11:31825743-31826967	N_Shore	0.0934832	0.484445	4.18217	9.86964e-09	4.65227e-06
cg07591229	NA	NA	NA	NA	NA	0.115826	0.193009	0.666376	9.93628e-09	4.67247e-06
cg25830379	NM_000875	IGF1R	Body	NA	NA	0.467345	0.727018	0.555634	1.01387e-08	4.73364e-06
cg18351999	NM_001135054	SIGIRR	Body	chr11:406491-407871	Island	0.163121	0.0620455	-0.619636	1.01301e-08	4.73526e-06
cg14795268	NM_017971	MRPL20	Body	chr1:1342004-1342952	N_Shore	0.144525	0.0506364	-0.649635	1.02677e-08	4.78819e-06
cg05178604	NM_018378	FBXL8	TSS1500	chr16:67193005-67193219	Island	0.124346	0.0486909	-0.608424	1.04111e-08	4.84354e-06
cg15865511	NA	NA	NA	NA	NA	0.4955	0.920391	0.857499	1.04336e-08	4.84826e-06
cg13471712	NM_001101802	PHF21A	3'UTR	NA	NA	0.693841	0.335882	-0.515909	1.05475e-08	4.88964e-06
cg27614309	NA	NA	NA	NA	NA	0.181656	0.375836	1.06895	1.05362e-08	4.89014e-06
cg14856585	NA	NA	NA	NA	NA	0.0637027	0.0294455	-0.537767	1.06266e-08	4.92048e-06
cg20861250	NM_001031715	IQCH	Body	NA	NA	0.476026	0.809964	0.701513	1.07532e-08	4.97323e-06
cg08375849	NM_173582	PGM2L1	TSS1500	chr11:74108894-74109937	S_Shore	0.140512	0.0645818	-0.540381	1.07754e-08	4.97766e-06
cg01574231	NM_199242	UNC13D	TSS200	NA	NA	0.182147	0.0623636	-0.657619	1.09033e-08	5.02489e-06
cg22446709	NM_002168	IDH2	Body	chr15:90644998-90646164	N_Shelf	0.355464	0.0863636	-0.75704	1.10797e-08	5.1002e-06
cg08454507	NM_020761	RPTOR	Body	NA	NA	0.45463	0.821309	0.806544	1.1147e-08	5.12519e-06
cg25210796	NM_020925	CACHD1	Body	NA	NA	0.723342	0.293455	-0.594308	1.13331e-08	5.19856e-06
cg18091264	NR_002442	SNORD18B	TSS1500	NA	NA	0.626391	0.166891	-0.733568	1.15692e-08	5.28832e-06
cg01787285	NM_003036	SKI	Body	chr1:2158212-2161173	S_Shore	0.435653	0.0749364	-0.827991	1.15922e-08	5.29267e-06
cg13775533	NM_020766	PCDH19	1stExon	chrX:99661653-99665358	Island	0.428227	0.751527	0.754976	1.17926e-08	5.36546e-06
cg19030554	NM_002513	NME3	TSS1500	chr16:1820311-1823954	Island	0.383971	0.100409	-0.738498	1.17884e-08	5.36978e-06
cg04694619	NM_001001891	ANO7	TSS200	NA	NA	0.71928	0.246391	-0.657448	1.18694e-08	5.38794e-06
cg24626659	NM_173572	CFAP46	Body	chr10:134755663-134756852	N_Shore	0.599258	0.165355	-0.724068	1.20552e-08	5.46597e-06
cg12267021	NM_006185	NUMA1	5'UTR	chr11:71791385-71791960	N_Shore	0.0701531	0.0272727	-0.61124	1.20882e-08	5.47458e-06
cg12555334	NM_001009186	CCT6A	Body	chr7:56119045-56119963	S_Shore	0.517029	0.208718	-0.596313	1.24092e-08	5.58775e-06
cg10356429	NA	NA	NA	NA	NA	0.104225	0.247655	1.37616	1.24532e-08	5.59471e-06
cg15172739	NR_002561	SNORD30	TSS200	chr11:62623359-62623877	N_Shelf	0.625363	0.218636	-0.650385	1.25969e-08	5.6399e-06
cg15003208	NM_001161581	POC1A	TSS1500	chr3:52188271-52189037	S_Shore	0.182252	0.0531727	-0.708246	1.27577e-08	5.69893e-06
cg26247093	NM_007353	GNA12	Body	chr7:2774444-2774655	N_Shore	0.358406	0.752536	1.09967	1.2845e-08	5.73141e-06
cg24720717	NM_001134479	LRRC8D	5'UTR	chr1:90308839-90309606	Island	0.0742248	0.0142727	-0.807709	1.28908e-08	5.73877e-06
cg23404877	NM_006464	TGOLN2	Body	chr2:85554134-85555414	N_Shore	0.110974	0.0364364	-0.671669	1.30278e-08	5.7932e-06
cg14308265	NA	NA	NA	NA	NA	0.256479	0.615891	1.40133	1.32186e-08	5.84495e-06
cg16367976	NM_001113755	TYMP	TSS1500	chr22:50963608-50970768	Island	0.046354	0.0180364	-0.610899	1.32942e-08	5.87176e-06
cg00957665	NM_030912	TRIM8	Body	chr10:104401821-104404968	S_Shore	0.381579	0.105909	-0.722445	1.3416e-08	5.9189e-06
cg16977872	NM_001135208	FKBP2	TSS1500	chr11:64008283-64009487	N_Shore	0.125284	0.0459727	-0.633052	1.34729e-08	5.93069e-06
cg02155398	NA	NA	NA	NA	NA	0.111995	0.548673	3.8991	1.35931e-08	5.97689e-06
cg10334489	NM_014238	KSR1	TSS200	NA	NA	0.632904	0.288964	-0.543432	1.36244e-08	5.98398e-06
cg08298794	NA	NA	NA	NA	NA	0.243365	0.0755727	-0.689467	1.39787e-08	6.10542e-06
cg18156601	NM_000044	AR	1stExon	chrX:66766037-66766279	Island	0.230811	0.463827	1.00956	1.39767e-08	6.11133e-06
cg08301612	NM_006460	HEXIM1	1stExon	chr17:43224933-43227616	S_Shore	0.434044	0.132191	-0.695444	1.40686e-08	6.13788e-06
cg01580888	NM_033103	RHPN2	TSS1500	chr19:33555246-33556431	Island	0.117312	0.0200909	-0.82874	1.41917e-08	6.1847e-06
cg22167515	NA	NA	NA	NA	NA	0.0674319	0.548036	7.12726	1.45754e-08	6.33784e-06
cg19628148	NM_182628	CFAP100	5'UTR	chr3:126113547-126113967	Island	0.106018	0.417609	2.93905	1.48321e-08	6.43521e-06
cg08777095	NM_172101	CD8B	Body	NA	NA	0.383823	0.824255	1.14749	1.48645e-08	6.44216e-06
cg05780543	NM_001142466	GPT2	3'UTR	NA	NA	0.373039	0.0827091	-0.778283	1.49318e-08	6.46417e-06
cg19572487	NM_000964	RARA	5'UTR	chr17:38474197-38474980	S_Shore	0.503213	0.180564	-0.641179	1.50493e-08	6.50787e-06
cg11594811	NM_001098517	CADM1	Body	NA	NA	0.68417	0.259518	-0.620682	1.52968e-08	6.59312e-06
cg08356214	NM_015318	ARHGEF18	5'UTR	chr19:7459779-7460376	Island	0.189907	0.0388636	-0.795354	1.55157e-08	6.67283e-06
cg03816707	NM_002251	KCNS1	Body	chr20:43726297-43727372	Island	0.17065	0.576273	2.37692	1.55053e-08	6.67565e-06
cg07924380	NA	NA	NA	NA	NA	0.0995575	0.0320636	-0.677939	1.55883e-08	6.68939e-06
cg07533239	NM_001144857	PLEKHG6	1stExon	chr12:6419603-6420024	S_Shelf	0.47425	0.115482	-0.756496	1.56055e-08	6.68944e-06
cg12800803	NM_002792	PSMA7	Body	chr20:60717598-60719667	N_Shore	0.0997761	0.0384818	-0.614318	1.55782e-08	6.69237e-06
cg18404811	NA	NA	NA	NA	NA	0.429086	0.820764	0.912819	1.59848e-08	6.82967e-06
cg10881225	NM_005680	TAF1B	Body	chr2:9983263-9983901	S_Shore	0.605376	0.176318	-0.708746	1.60776e-08	6.8544e-06
cg08486903	NM_181349	SMURF1	Body	chr7:98741205-98741990	N_Shore	0.628448	0.223773	-0.643928	1.64322e-08	6.99798e-06
cg27485906	NA	NA	NA	NA	NA	0.258088	0.807891	2.13029	1.66951e-08	7.07926e-06
cg14712784	NM_006473	TAF6L	Body	chr11:62554066-62555262	N_Shore	0.822772	0.389836	-0.526191	1.66944e-08	7.0866e-06
cg23353952	NM_021076	NEFH	1stExon	chr22:29875919-29877242	Island	0.0775389	0.426645	4.50234	1.69749e-08	7.18237e-06
cg13411656	NM_001080412	ZBTB38	5'UTR	chr3:141120983-141121678	Island	0.138731	0.0514545	-0.629106	1.70974e-08	7.2109e-06
cg05790038	NM_145068	TRPV3	1stExon	NA	NA	0.613365	0.281027	-0.541827	1.73258e-08	7.26818e-06
cg11439393	NM_005104	BRD2	Body	chr6:32939275-32940954	S_Shore	0.112846	0.0523545	-0.536053	1.73235e-08	7.27502e-06
cg01493678	NM_002120	HLA-DOB	TSS200	NA	NA	0.653504	0.246991	-0.622052	1.75936e-08	7.36478e-06
cg26417427	NM_198334	GANAB	Body	chr11:62413632-62414293	N_Shore	0.104579	0.0410727	-0.607256	1.76434e-08	7.36994e-06
cg14324585	NM_000445	PLEC	Body	chr8:145027911-145028352	N_Shore	0.117257	0.0550818	-0.530246	1.77564e-08	7.40925e-06
cg14443182	NM_012266	DNAJB5	Body	NA	NA	0.560941	0.252018	-0.550722	1.77982e-08	7.41882e-06
cg02127509	NM_001161660	MYB	Body	NA	NA	0.42505	0.733091	0.724719	1.78208e-08	7.42036e-06
cg12474798	NM_032804	ADO	1stExon	chr10:64564435-64565818	Island	0.480391	0.0704818	-0.853282	1.80383e-08	7.50295e-06
cg01930746	NM_005742	PDIA6	Body	chr2:10952402-10953384	N_Shore	0.446982	0.107027	-0.760556	1.81464e-08	7.53994e-06
cg10805956	NM_030980	ISG20L2	1stExon	chr1:156698111-156698916	N_Shore	0.0692204	0.0289182	-0.58223	1.82111e-08	7.55881e-06
cg20023102	NM_019080	NDFIP2	TSS1500	chr13:80055066-80055713	N_Shore	0.275064	0.113855	-0.586079	1.83064e-08	7.58235e-06
cg17516247	NA	NA	NA	NA	NA	0.539656	0.183891	-0.659244	1.8328e-08	7.58329e-06
cg17382048	NM_001716	CXCR5	TSS200	NA	NA	0.679906	0.219182	-0.677629	1.85384e-08	7.63015e-06
cg23012579	NM_001031711	ERGIC1	Body	NA	NA	0.182376	0.0317182	-0.826084	1.85913e-08	7.64391e-06
cg21700772	NA	NA	NA	NA	NA	0.699552	0.288545	-0.587528	1.87205e-08	7.67294e-06
cg04414274	NM_006497	HIC1	TSS1500	chr17:1952919-1962328	Island	0.0994735	0.0427818	-0.569917	1.87098e-08	7.67654e-06
cg03846249	NA	NA	NA	NA	NA	0.195308	0.0900273	-0.53905	1.87082e-08	7.68394e-06
cg10928294	NM_004527	MEOX1	TSS1500	NA	NA	0.484515	0.124036	-0.743999	1.8818e-08	7.70484e-06
cg17432350	NA	NA	NA	NA	NA	0.201888	0.347091	0.719228	1.89566e-08	7.75352e-06
cg04090867	NM_001079843	CASZ1	5'UTR	NA	NA	0.745208	0.367164	-0.5073	1.95087e-08	7.97102e-06
cg24144070	NM_198082	CCDC57	TSS1500	chr17:80170322-80171302	Island	0.0945708	0.0323545	-0.65788	1.97746e-08	8.05452e-06
cg01243823	NM_022162	NOD2	Body	NA	NA	0.358019	0.100064	-0.720508	2.01651e-08	8.17962e-06
cg09293890	NA	NA	NA	NA	NA	0.455581	0.196573	-0.568523	2.03699e-08	8.25418e-06
cg25824509	NM_145166	ZBTB47	Body	chr3:42700092-42700355	S_Shore	0.792179	0.390482	-0.507079	2.0405e-08	8.25989e-06
cg25503381	NM_003246	THBS1	TSS1500	chr15:39872527-39873567	N_Shore	0.567608	0.182636	-0.678235	2.04548e-08	8.27151e-06
cg09498078	NM_012334	MYO10	Body	NA	NA	0.521547	0.198673	-0.61907	2.0663e-08	8.3471e-06
cg10278102	NM_001145167	PRMT3	5'UTR	chr11:20408755-20409781	S_Shore	0.565149	0.214155	-0.621065	2.08334e-08	8.39867e-06
cg24035245	NA	NA	NA	NA	NA	0.24122	0.6585	1.72987	2.09236e-08	8.40914e-06
cg15270353	NA	NA	NA	NA	NA	0.436976	0.200009	-0.542288	2.10897e-08	8.4672e-06
cg20844427	NA	NA	NA	NA	NA	0.643599	0.249255	-0.612718	2.1287e-08	8.53769e-06
cg16247817	NM_024330	SLC27A3	TSS200	chr1:153747655-153748698	Island	0.221123	0.0398636	-0.819722	2.1751e-08	8.69715e-06
cg21429551	NM_002047	GARS	Body	chr7:30634124-30635058	S_Shore	0.47952	0.144345	-0.69898	2.1814e-08	8.71345e-06
cg11344626	NM_001135610	PRDM2	TSS1500	chr1:14026481-14027200	N_Shore	0.228782	0.0940182	-0.58905	2.24593e-08	8.95302e-06
cg23917399	NM_014350	TNFAIP8	1stExon	chr5:118691401-118691759	Island	0.198815	0.0565818	-0.715405	2.257e-08	8.97892e-06
cg24221648	NA	NA	NA	NA	NA	0.113693	0.625591	4.50246	2.26231e-08	8.9909e-06
cg01329789	NM_015488	PNKD	Body	chr2:219156977-219157380	S_Shore	0.338943	0.148391	-0.562196	2.28136e-08	9.04831e-06
cg18504218	NM_031448	C19orf12	TSS200	chr19:30206040-30206497	S_Shore	0.145719	0.0445091	-0.694556	2.29929e-08	9.09188e-06
cg20886263	NM_006254	PRKCD	5'UTR	chr3:53194716-53196133	Island	0.107296	0.0532909	-0.503326	2.32887e-08	9.19958e-06
cg04255391	NM_201382	PLEC	Body	chr8:145008908-145009407	N_Shore	0.388638	0.116182	-0.701054	2.36263e-08	9.29553e-06
cg00466334	NM_152380	TBX15	TSS1500	chr1:119531991-119532196	S_Shore	0.289127	0.625064	1.1619	2.3569e-08	9.30093e-06
cg08632810	NM_012154	AGO2	Body	NA	NA	0.415718	0.811373	0.95174	2.45256e-08	9.60123e-06
cg14174912	NM_001160125	KLF6	Body	chr10:3823789-3824017	S_Shore	0.4615	0.0880364	-0.809239	2.47049e-08	9.65219e-06
cg08045981	NA	NA	NA	NA	NA	0.383581	0.104909	-0.7265	2.49998e-08	9.7577e-06
cg03096543	NM_015234	ADGRF5	5'UTR	NA	NA	0.508816	0.226264	-0.555313	2.50412e-08	9.76415e-06
cg10662871	NM_002473	MYH9	TSS1500	chr22:36782965-36784492	S_Shore	0.0911814	0.0293727	-0.677865	2.51838e-08	9.81001e-06
cg22990198	NM_015894	STMN3	Body	chr20:62283516-62284835	Island	0.115436	0.0484818	-0.580012	2.53244e-08	9.85499e-06
cg19101232	NM_006805	HNRNPA0	TSS1500	chr5:137089253-137090878	S_Shore	0.689688	0.300627	-0.564112	2.54931e-08	9.91084e-06
cg11472786	NM_024827	HDAC11	Body	chr3:13521506-13522262	Island	0.18534	0.0552818	-0.701727	2.57582e-08	9.96456e-06
cg14522718	NM_052901	SLC25A25	Body	NA	NA	0.426483	0.898282	1.10625	2.56821e-08	9.9646e-06
cg25989216	NM_001031711	ERGIC1	Body	NA	NA	0.0978735	0.0335545	-0.657164	2.58129e-08	9.97589e-06
cg13315450	NR_026909	STK16	Body	chr2:220117937-220119334	N_Shelf	0.622542	0.123527	-0.801576	2.60091e-08	1.00418e-05
cg04895166	NA	NA	NA	NA	NA	0.728849	0.3613	-0.504287	2.60528e-08	1.00488e-05
cg06375761	NM_172208	TAPBP	Body	chr6:33281112-33281827	N_Shore	0.0960885	0.0308091	-0.679368	2.61183e-08	1.00642e-05
cg27181013	NM_031299	CDCA3	Body	chr12:6961005-6961873	N_Shore	0.738405	0.368845	-0.500484	2.61824e-08	1.0079e-05
cg26077811	NM_171997	USP2	Body	chr11:119234480-119235214	N_Shelf	0.447688	0.109209	-0.75606	2.62202e-08	1.00837e-05
cg14391469	NM_004322	BAD	1stExon	chr11:64052607-64053652	N_Shore	0.155849	0.0549273	-0.64756	2.63636e-08	1.0119e-05
cg13325904	NA	NA	NA	NA	NA	0.823722	0.325345	-0.60503	2.63536e-08	1.01251e-05
cg20816447	NM_020785	CC2D2A	Body	NA	NA	0.210692	0.104036	-0.506216	2.65645e-08	1.01762e-05
cg22044342	NM_002558	P2RX1	Body	NA	NA	0.423836	0.751345	0.772726	2.66612e-08	1.01934e-05
cg12626076	NM_013272	SLCO3A1	Body	chr15:92396013-92397682	S_Shore	0.813651	0.248682	-0.694363	2.66359e-08	1.01936e-05
cg10596006	NM_001640	APEH	TSS1500	chr3:49710968-49712279	Island	0.0991894	0.0374818	-0.622119	2.67092e-08	1.02018e-05
cg09901208	NM_138425	C12orf57	TSS1500	chr12:7053149-7053927	N_Shore	0.139265	0.0608545	-0.563029	2.6955e-08	1.02757e-05
cg08554554	NM_003224	ARFRP1	3'UTR	chr20:62328013-62328558	S_Shelf	0.632514	0.126191	-0.800493	2.70208e-08	1.02808e-05
cg16518861	NM_020529	NFKBIA	Body	chr14:35873047-35873990	N_Shore	0.400553	0.0827545	-0.793399	2.7157e-08	1.03226e-05
cg02995055	NM_001009814	VWA8	TSS1500	chr13:42534880-42535461	Island	0.0696248	0.0324091	-0.534518	2.72369e-08	1.0343e-05
cg26347170	NM_176812	CHMP4B	3'UTR	NA	NA	0.439558	0.915573	1.08294	2.74379e-08	1.04093e-05
cg20267828	NM_001164687	THEMIS	5'UTR	NA	NA	0.396267	0.741136	0.870294	2.76034e-08	1.04418e-05
cg23583454	NM_002714	PPP1R10	5'UTR	chr6:30584885-30585677	N_Shelf	0.326477	0.139164	-0.573741	2.83237e-08	1.06936e-05
cg25415246	NM_001080488	ONECUT3	Body	chr19:1762372-1762848	Island	0.148868	0.463509	2.11355	2.87798e-08	1.08139e-05
cg17477162	NA	NA	NA	NA	NA	0.1169	0.459755	2.93289	2.92339e-08	1.0953e-05
cg12633102	NA	NA	NA	NA	NA	0.258927	0.582591	1.25002	2.9956e-08	1.11703e-05
cg18747039	NA	NA	NA	NA	NA	0.188592	0.465364	1.46757	3.02247e-08	1.12598e-05
cg26994377	NA	NA	NA	NA	NA	0.178998	0.0537909	-0.699489	3.05579e-08	1.13302e-05
cg07307332	NA	NA	NA	NA	NA	0.673866	0.293082	-0.565074	3.0588e-08	1.13306e-05
cg12042714	NA	NA	NA	NA	NA	0.337644	0.799491	1.36785	3.09662e-08	1.14384e-05
cg00059089	NM_052905	FMNL2	Body	NA	NA	0.551743	0.243664	-0.558375	3.15073e-08	1.16164e-05
cg21605283	NM_138328	RHBDL3	Body	NA	NA	0.472313	0.741727	0.570414	3.19619e-08	1.17729e-05
cg02491754	NM_003109	SP1	TSS1500	chr12:53774336-53774603	N_Shore	0.341272	0.155045	-0.545683	3.21658e-08	1.18369e-05
cg11576123	NA	NA	NA	NA	NA	0.0741115	0.0313182	-0.577418	3.22059e-08	1.18406e-05
cg01661567	NM_012318	LETM1	Body	chr4:1843080-1843352	Island	0.375449	0.702673	0.871555	3.22689e-08	1.18527e-05
cg06035708	NM_001142333	RBFOX1	5'UTR	chr16:6068914-6070401	S_Shelf	0.577525	0.165882	-0.712771	3.25313e-08	1.19379e-05
cg13079949	NM_172251	MRPL54	Body	chr19:3761480-3761826	S_Shore	0.165406	0.0612455	-0.629727	3.26547e-08	1.19496e-05
cg16674860	NM_000195	HPS1	5'UTR	NA	NA	0.107023	0.0508818	-0.524571	3.25989e-08	1.19515e-05
cg19224203	NM_006397	RNASEH2A	TSS200	chr19:12917186-12917676	Island	0.118367	0.0390364	-0.67021	3.26365e-08	1.19541e-05
cg07992484	NM_025076	UXS1	Body	NA	NA	0.573175	0.232791	-0.593857	3.27723e-08	1.19704e-05
cg01959541	NA	NA	NA	NA	NA	0.0700929	0.0302182	-0.568884	3.2923e-08	1.20142e-05
cg10447615	NM_015127	CLCC1	TSS1500	chr1:109505681-109506214	S_Shore	0.561723	0.213536	-0.619855	3.29672e-08	1.20192e-05
cg21773962	NM_005634	SOX3	1stExon	chrX:139585867-139588578	Island	0.248699	0.498309	1.00366	3.34869e-08	1.2141e-05
cg14823851	NM_018488	TBX4	TSS1500	chr17:59531723-59535254	Island	0.21891	0.529282	1.41781	3.34029e-08	1.21442e-05
cg17521665	NM_001198	PRDM1	Body	NA	NA	0.45433	0.131855	-0.709782	3.34455e-08	1.21484e-05
cg14268223	NM_001539	DNAJA1	Body	chr9:33025082-33025797	S_Shore	0.16111	0.0495818	-0.692248	3.36943e-08	1.2205e-05
cg19917530	NM_207363	NCKAP5	Body	NA	NA	0.536847	0.2644	-0.507495	3.37752e-08	1.2223e-05
cg11379081	NA	NA	NA	NA	NA	0.302987	0.705064	1.32704	3.3905e-08	1.22587e-05
cg03831971	NM_001031723	DNAJB14	TSS1500	chr4:100867328-100868162	Island	0.0884602	0.0375909	-0.575053	3.39468e-08	1.22625e-05
cg09436420	NR_027622	LOC100128164	Body	chr3:169684394-169685006	N_Shore	0.0968646	0.0481	-0.503431	3.42823e-08	1.23496e-05
cg02636177	NM_001134742	SLC4A4	Body	NA	NA	0.839043	0.395545	-0.528576	3.48087e-08	1.25162e-05
cg16479633	NA	NA	NA	NA	NA	0.44575	0.771809	0.731486	3.4944e-08	1.25534e-05
cg10721220	NA	NA	NA	NA	NA	0.725764	0.150873	-0.792119	3.50742e-08	1.25886e-05
cg03158561	NM_000990	RPL27A	Body	chr11:8703783-8704616	S_Shore	0.629863	0.168082	-0.733145	3.5209e-08	1.26255e-05
cg24046474	NM_138361	LRSAM1	TSS1500	chr9:130213143-130214335	N_Shore	0.398376	0.121145	-0.695902	3.53076e-08	1.26493e-05
cg03640531	NM_024610	HSPBAP1	Body	chr3:122512485-122512798	N_Shore	0.0606053	0.0292364	-0.517594	3.54232e-08	1.26676e-05
cg02646515	NA	NA	NA	NA	NA	0.464441	0.1423	-0.69361	3.5713e-08	1.27249e-05
cg00636194	NM_080827	WFDC6	TSS1500	NA	NA	0.396625	0.139073	-0.649359	3.59599e-08	1.27781e-05
cg21684179	NM_033088	STRIP1	TSS1500	chr1:110577199-110577942	N_Shore	0.636864	0.291318	-0.542574	3.59549e-08	1.27879e-05
cg19681842	NM_032490	GON7	Body	chr14:93673128-93673917	N_Shore	0.373015	0.168455	-0.548397	3.61131e-08	1.28209e-05
cg25288068	NA	NA	NA	NA	NA	0.428702	0.683682	0.594773	3.69923e-08	1.30975e-05
cg19442545	NM_173540	FUT11	Body	chr10:75531970-75532817	S_Shore	0.102555	0.0253182	-0.753125	3.70975e-08	1.31111e-05
cg06797880	NM_001127258	HHIPL1	Body	chr14:100111120-100111906	S_Shore	0.615301	0.244673	-0.602353	3.74051e-08	1.31961e-05
cg13638257	NM_172208	TAPBP	Body	chr6:33281112-33281827	N_Shore	0.123552	0.0282545	-0.771315	3.78373e-08	1.32888e-05
cg20140054	NM_015853	UBXN1	Body	chr11:62446038-62446613	N_Shore	0.366739	0.0992455	-0.729384	3.78257e-08	1.32967e-05
cg01331992	NM_001010	RPS6	Body	chr9:19379794-19380341	N_Shore	0.516877	0.178527	-0.654604	3.82975e-08	1.34145e-05
cg00588297	NM_133637	DQX1	TSS1500	chr2:74756223-74757930	N_Shelf	0.669632	0.3017	-0.549454	3.84164e-08	1.34321e-05
cg08548748	NM_017823	DUSP23	TSS1500	chr1:159750416-159751353	N_Shore	0.0614956	0.0304909	-0.504177	3.84092e-08	1.34416e-05
cg15044384	NM_015683	ARRDC2	TSS1500	chr19:18118741-18119553	N_Shore	0.0494513	0.0239364	-0.515961	3.8559e-08	1.347e-05
cg10865119	NR_026780	LINC00574	TSS200	chr6:170190111-170190712	Island	0.18075	0.0608455	-0.663373	3.9241e-08	1.36355e-05
cg07883457	NA	NA	NA	NA	NA	0.223927	0.498509	1.22622	4.05429e-08	1.40754e-05
cg22950493	NA	NA	NA	NA	NA	0.268692	0.106	-0.605496	4.10269e-08	1.42058e-05
cg06381803	NM_012155	EML2	Body	chr19:46119454-46119815	Island	0.706643	0.192218	-0.727984	4.17151e-08	1.43933e-05
cg21796547	NM_173462	PAPLN	5'UTR	chr14:73706299-73706677	N_Shore	0.365678	0.121673	-0.667268	4.16889e-08	1.43969e-05
cg25161912	NR_026825	RPSAP52	TSS200	chr12:66217627-66220181	S_Shore	0.580455	0.262418	-0.547909	4.16697e-08	1.44029e-05
cg20118717	NM_006772	SYNGAP1	Body	NA	NA	0.416711	0.757673	0.818223	4.19475e-08	1.44354e-05
cg25756680	NM_030930	UNC93B1	TSS200	chr11:67770426-67771629	S_Shore	0.0777655	0.0290727	-0.626149	4.21501e-08	1.44798e-05
cg01218206	NM_025164	SIK3	Body	NA	NA	0.697693	0.171036	-0.754854	4.22479e-08	1.45007e-05
cg03034696	NM_001743	CALM2	Body	chr2:47402809-47404105	N_Shelf	0.54405	0.223264	-0.589626	4.23772e-08	1.45324e-05
cg00651087	NA	NA	NA	NA	NA	0.18968	0.0565909	-0.70165	4.24769e-08	1.45411e-05
cg05021643	NM_006898	HOXD3	5'UTR	chr2:177029413-177029941	Island	0.0952956	0.444118	3.66043	4.25648e-08	1.45585e-05
cg25632883	NM_001161330	SSH1	Body	chr12:109251205-109251586	N_Shore	0.503827	0.112836	-0.776042	4.27569e-08	1.46115e-05
cg14622819	NM_001565	CXCL10	TSS200	NA	NA	0.60407	0.202573	-0.664654	4.28956e-08	1.46462e-05
cg01170276	NA	NA	NA	NA	NA	0.104803	0.0456273	-0.564636	4.30071e-08	1.46587e-05
cg23523668	NA	NA	NA	NA	NA	0.415583	0.0773818	-0.813799	4.37637e-08	1.49037e-05
cg07954423	NM_001035254	FAM102A	Body	chr9:130742515-130743486	N_Shore	0.162627	0.0551818	-0.660686	4.38309e-08	1.49136e-05
cg05574272	NM_016568	RXFP3	1stExon	chr5:33936168-33938309	Island	0.274919	0.549473	0.998674	4.44228e-08	1.50889e-05
cg13691192	NA	NA	NA	NA	NA	0.683669	0.334691	-0.510449	4.48458e-08	1.52062e-05
cg23035209	NM_001037637	BTF3	Body	chr5:72794040-72794641	S_Shore	0.226569	0.0979182	-0.567822	4.51017e-08	1.52535e-05
cg18556676	NA	NA	NA	NA	NA	0.253397	0.577345	1.27842	4.54987e-08	1.53613e-05
cg02531437	NM_004248	PRLHR	TSS200	chr10:120353692-120355821	Island	0.193816	0.459673	1.3717	4.6361e-08	1.56256e-05
cg17888086	NM_025079	ZC3H12A	Body	NA	NA	0.0938531	0.0368091	-0.607801	4.65743e-08	1.56706e-05
cg12895304	NM_000282	PCCA	Body	NA	NA	0.571377	0.910345	0.593248	4.69227e-08	1.57608e-05
cg16211507	NA	NA	NA	NA	NA	0.113869	0.0522091	-0.541499	4.70291e-08	1.5783e-05
cg02863594	NM_172208	TAPBP	Body	chr6:33281112-33281827	N_Shore	0.237157	0.0710364	-0.700466	4.72945e-08	1.58585e-05
cg22236626	NM_013349	NENF	Body	chr1:212606105-212606844	Island	0.230054	0.0881545	-0.616809	4.75463e-08	1.59158e-05
cg04890576	NA	NA	NA	NA	NA	0.499633	0.169018	-0.661715	4.77172e-08	1.59458e-05
cg13518625	NA	NA	NA	NA	NA	0.197584	0.0544091	-0.724628	4.79324e-08	1.60041e-05
cg27407935	NM_004176	SREBF1	Body	chr17:17726855-17727282	N_Shelf	0.64266	0.138964	-0.783768	4.86737e-08	1.62102e-05
cg26021007	NA	NA	NA	NA	NA	0.222295	0.0801	-0.639668	4.87883e-08	1.62209e-05
cg23617676	NM_007260	LYPLA2	TSS1500	chr1:24117482-24117824	N_Shore	0.271475	0.0915545	-0.662752	4.8855e-08	1.62293e-05
cg26476852	NM_152739	HOXA9	1stExon	chr7:27203915-27206462	Island	0.155204	0.555964	2.58216	4.89549e-08	1.62488e-05
cg17114584	NM_004031	IRF7	Body	chr11:614760-616068	N_Shore	0.564072	0.198455	-0.648175	4.90777e-08	1.62758e-05
cg22383924	NM_005427	TP73	5'UTR	NA	NA	0.471548	0.2077	-0.559536	4.92918e-08	1.6333e-05
cg21293216	NM_021258	IL22RA1	TSS200	NA	NA	0.69184	0.270236	-0.609395	4.94883e-08	1.63429e-05
cg03592197	NM_002812	PSMD8	1stExon	chr19:38865263-38865733	Island	0.0708814	0.0296364	-0.581888	4.96346e-08	1.63637e-05
cg04065108	NM_001080447	TTLL8	Body	chr22:50453056-50454137	Island	0.107473	0.0483727	-0.549906	4.96244e-08	1.63741e-05
cg25018951	NM_018323	PI4K2B	TSS1500	chr4:25235458-25236246	N_Shore	0.129842	0.0600636	-0.537408	4.98976e-08	1.63954e-05
cg25586848	NM_152531	XXYLT1	Body	NA	NA	0.12231	0.0590273	-0.517395	5.0027e-08	1.64241e-05
cg16107907	NR_027768	DPY19L2P2	TSS1500	chr7:102920309-102921514	Island	0.163332	0.322264	0.97306	5.03472e-08	1.65154e-05
cg27020362	NM_016459	MZB1	3'UTR	NA	NA	0.353564	0.616427	0.743469	5.05811e-08	1.65507e-05
cg19843165	NM_001136239	PRDM6	Body	chr5:122426125-122426836	S_Shore	0.2155	0.0668273	-0.689897	5.05625e-08	1.65584e-05
cg10828401	NM_002819	PTBP1	Body	chr19:796506-798936	S_Shore	0.196484	0.0973364	-0.504609	5.05207e-08	1.65585e-05
cg16049335	NM_001080424	KDM6B	5'UTR	chr17:7745066-7748420	S_Shore	0.135109	0.0397455	-0.705826	5.1066e-08	1.66815e-05
cg07142009	NA	NA	NA	NA	NA	0.49357	0.743491	0.506354	5.11836e-08	1.67061e-05
cg12317815	NM_001128085	ASPA	5'UTR	NA	NA	0.471969	0.225373	-0.522484	5.12524e-08	1.67146e-05
cg04806421	NM_015027	PDXDC1	Body	chr16:15068516-15069461	S_Shore	0.146597	0.0689909	-0.529385	5.16809e-08	1.67986e-05
cg07465344	NM_005022	PFN1	Body	chr17:4850942-4853907	N_Shore	0.669333	0.270291	-0.596179	5.16513e-08	1.68168e-05
cg10462820	NM_001128629	BUB1B-PAK6	Body	NA	NA	0.208377	0.0871364	-0.581833	5.20139e-08	1.68649e-05
cg10075819	NM_004987	LIMS1	5'UTR	NA	NA	0.534653	0.256173	-0.520862	5.20127e-08	1.68785e-05
cg26209676	NM_207115	ZNF580	Body	chr19:56154041-56154405	Island	0.331004	0.109145	-0.67026	5.22628e-08	1.69316e-05
cg19100935	NM_012425	RSU1	Body	NA	NA	0.333936	0.153755	-0.539569	5.23805e-08	1.69558e-05
cg27166718	NM_206921	CEP85L	Body	NA	NA	0.426212	0.657009	0.541506	5.28661e-08	1.70848e-05
cg10732871	NM_002085	GPX4	TSS1500	chr19:1103722-1105758	N_Shore	0.508049	0.110209	-0.783074	5.30437e-08	1.71281e-05
cg02962602	NM_198082	CCDC57	TSS1500	chr17:80170322-80171302	S_Shore	0.471303	0.0823636	-0.825243	5.32556e-08	1.71824e-05
cg16791210	NM_001135022	ELMOD3	TSS1500	chr2:85581618-85581963	N_Shore	0.325875	0.109336	-0.664484	5.34005e-08	1.7215e-05
cg07780543	NA	NA	NA	NA	NA	0.131379	0.518873	2.94944	5.42996e-08	1.74761e-05
cg10583119	NR_030211	MIR518D	TSS1500	NA	NA	0.372825	0.105555	-0.716879	5.44745e-08	1.75181e-05
cg11884933	NM_007353	GNA12	Body	chr7:2774444-2774655	N_Shore	0.420419	0.737727	0.754745	5.50183e-08	1.7664e-05
cg23073974	NA	NA	NA	NA	NA	0.475521	0.768027	0.615127	5.52642e-08	1.77285e-05
cg27374881	NR_002588	SNORA4	TSS1500	chr3:186500738-186502048	S_Shore	0.602834	0.198655	-0.670465	5.53247e-08	1.77334e-05
cg15945235	NM_144590	ANKRD22	1stExon	NA	NA	0.397948	0.145627	-0.634054	5.55526e-08	1.77919e-05
cg25921543	NM_001166243	FHIT	Body	NA	NA	0.512578	0.844091	0.646756	5.67999e-08	1.81618e-05
cg01005506	NM_032804	ADO	1stExon	chr10:64564435-64565818	Island	0.319029	0.0800455	-0.749097	5.71415e-08	1.82413e-05
cg25737313	NA	NA	NA	NA	NA	0.126827	0.0276182	-0.782237	5.71315e-08	1.82529e-05
cg07571519	NM_022124	CDH23	Body	NA	NA	0.405211	0.712764	0.758995	5.74516e-08	1.83254e-05
cg08856118	NM_014915	ANKRD26	TSS1500	chr10:27389075-27389622	S_Shore	0.408793	0.108109	-0.735541	5.78512e-08	1.84229e-05
cg23919844	NM_001113512	ARHGEF7	Body	NA	NA	0.511407	0.796418	0.557308	5.96039e-08	1.88891e-05
cg00817377	NM_001081754	ELN	TSS1500	NA	NA	0.366441	0.0789182	-0.784636	5.96681e-08	1.88942e-05
cg05187003	NM_000628	IL10RB	Body	chr21:34638515-34639075	S_Shelf	0.610698	0.281636	-0.538829	5.97942e-08	1.89189e-05
cg27217148	NM_001011663	PCGF6	TSS1500	chr10:105110265-105111008	S_Shore	0.560626	0.120609	-0.784867	5.98856e-08	1.89326e-05
cg18026626	NR_026998	LOC91450	TSS200	NA	NA	0.365397	0.113209	-0.690175	6.02834e-08	1.9043e-05
cg17744261	NM_001129885	CPSF4L	Body	NA	NA	0.113016	0.0402545	-0.643815	6.0587e-08	1.91082e-05
cg07105285	NM_005959	MTNR1B	TSS200	chr11:92702789-92703434	N_Shore	0.266981	0.512	0.917743	6.16182e-08	1.93557e-05
cg24293914	NM_001017520	DNTT	Body	NA	NA	0.227291	0.0669091	-0.705624	6.1959e-08	1.94472e-05
cg02687883	NM_024848	MORN1	Body	chr1:2266007-2266432	Island	0.637293	0.268555	-0.578601	6.22138e-08	1.94494e-05
cg16280667	NM_001716	CXCR5	5'UTR	NA	NA	0.770626	0.337073	-0.562599	6.21875e-08	1.94567e-05
cg10477621	NM_152898	FERD3L	1stExon	chr7:19184818-19185033	Island	0.204293	0.626491	2.06663	6.21124e-08	1.94642e-05
cg03990033	NM_001773	CD34	Body	chr1:208084098-208084513	N_Shore	0.293245	0.695655	1.37226	6.21769e-08	1.94688e-05
cg02671750	NM_001037730	DEFB115	TSS200	NA	NA	0.117338	0.0426273	-0.636714	6.29073e-08	1.95882e-05
cg19529472	NA	NA	NA	NA	NA	0.177657	0.0721455	-0.593905	6.34258e-08	1.96872e-05
cg20566766	NM_016459	MZB1	Body	chr5:138727710-138730911	N_Shelf	0.306286	0.581255	0.897752	6.33267e-08	1.96876e-05
cg21054521	NA	NA	NA	NA	NA	0.225324	0.492345	1.18506	6.49012e-08	2.00501e-05
cg15858166	NM_015347	RIMBP2	Body	chr12:130953626-130953829	N_Shore	0.604712	0.276364	-0.542983	6.48913e-08	2.00628e-05
cg07638462	NM_006961	ZNF19	TSS1500	NA	NA	0.572957	0.203355	-0.645079	6.49986e-08	2.00644e-05
cg27315635	NM_004983	KCNJ9	TSS1500	chr1:160053721-160054738	N_Shelf	0.538568	0.205973	-0.617555	6.48745e-08	2.00734e-05
cg08778287	NM_000875	IGF1R	Body	chr15:99500472-99500721	N_Shore	0.44315	0.709455	0.600934	6.53947e-08	2.0155e-05
cg16417409	NA	NA	NA	NA	NA	0.456172	0.203309	-0.554315	6.60966e-08	2.03394e-05
cg18781835	NA	NA	NA	NA	NA	0.639742	0.208	-0.674869	6.63056e-08	2.03718e-05
cg05012902	NM_014232	VAMP2	Body	chr17:8065909-8066494	N_Shore	0.315995	0.0883545	-0.720392	6.71757e-08	2.05907e-05
cg08852641	NM_000767	CYP2B6	Body	NA	NA	0.535615	0.1662	-0.689703	6.75036e-08	2.06429e-05
cg00392257	NM_030980	ISG20L2	1stExon	chr1:156698111-156698916	N_Shore	0.648373	0.3224	-0.502755	6.74149e-08	2.0648e-05
cg19644670	NM_033417	HAUS8	Body	chr19:17186043-17187233	N_Shore	0.355826	0.127636	-0.641295	6.7477e-08	2.06509e-05
cg07588779	NM_004322	BAD	1stExon	chr11:64052607-64053652	N_Shore	0.22667	0.0588727	-0.740271	6.76513e-08	2.06559e-05
cg11975790	NM_001954	DDR1	5'UTR	chr6:30852102-30852676	S_Shore	0.510496	0.216645	-0.575617	6.80974e-08	2.07759e-05
cg20545458	NA	NA	NA	NA	NA	0.505667	0.204536	-0.595512	6.86425e-08	2.0926e-05
cg03125341	NM_153746	ZDHHC14	Body	NA	NA	0.577127	0.111955	-0.806014	6.88777e-08	2.09814e-05
cg14423778	NM_207292	MBNL1	TSS1500	chr3:151986327-151987325	N_Shore	0.424159	0.741591	0.748378	6.91416e-08	2.10129e-05
cg19713429	NM_004930	CAPZB	Body	chr1:19811703-19812644	N_Shore	0.289581	0.0978727	-0.662019	7.05392e-08	2.1355e-05
cg07236001	NA	NA	NA	NA	NA	0.768043	0.361882	-0.528826	7.05222e-08	2.13663e-05
cg26808687	NM_001114309	ELF3	TSS200	NA	NA	0.653137	0.276418	-0.576784	7.04681e-08	2.13664e-05
cg08755130	NR_026973	HLA-F-AS1	Body	NA	NA	0.224299	0.0619545	-0.723786	7.06889e-08	2.13838e-05
cg06088324	NM_016235	GPRC5B	5'UTR	chr16:19894965-19897156	Island	0.0686664	0.0335364	-0.511604	7.08243e-08	2.14083e-05
cg06538345	NR_000020	SNORD33	TSS1500	chr19:49991240-49991518	S_Shore	0.731094	0.229155	-0.686559	7.11782e-08	2.14657e-05
cg02744216	NA	NA	NA	NA	NA	0.671742	0.254845	-0.62062	7.17671e-08	2.16267e-05
cg08277369	NM_020947	TLDC1	TSS1500	chr16:84538884-84539115	Island	0.194911	0.0862091	-0.557699	7.21643e-08	2.17297e-05
cg11476241	NM_020761	RPTOR	Body	chr17:78870137-78870443	N_Shelf	0.712832	0.353155	-0.504575	7.24793e-08	2.18078e-05
cg07455789	NA	NA	NA	NA	NA	0.310069	0.689836	1.22478	7.26069e-08	2.18128e-05
cg23024444	NM_004219	PTTG1	TSS1500	chr5:159848779-159849113	N_Shore	0.462493	0.186455	-0.596849	7.2569e-08	2.18181e-05
cg01702009	NM_138296	PTCRA	5'UTR	NA	NA	0.395412	0.834473	1.11039	7.2922e-08	2.1874e-05
cg18693704	NM_181521	CMTM4	TSS1500	chr16:66729825-66731262	S_Shore	0.335306	0.134518	-0.59882	7.40476e-08	2.21103e-05
cg01196079	NM_199454	PRDM16	Body	chr1:3203765-3204453	N_Shore	0.548272	0.240064	-0.562145	7.39927e-08	2.21107e-05
cg05615150	NM_016300	ARPP21	TSS200	chr3:35680509-35681628	S_Shelf	0.464912	0.835218	0.79651	7.41069e-08	2.21112e-05
cg13261623	NM_001166579	AANAT	Body	NA	NA	0.0943133	0.0461818	-0.510336	7.38877e-08	2.2113e-05
cg08282819	NM_181078	IL21R	5'UTR	NA	NA	0.123422	0.0383727	-0.689094	7.46568e-08	2.22414e-05
cg04812347	NM_032955	AIF1	Body	chr6:31587779-31589024	N_Shelf	0.298179	0.731664	1.45378	7.46433e-08	2.22543e-05
cg07589064	NA	NA	NA	NA	NA	0.134354	0.0664182	-0.505648	7.49908e-08	2.22902e-05
cg26635214	NM_025193	HSD3B7	TSS200	NA	NA	0.136744	0.0377818	-0.723705	7.49097e-08	2.22999e-05
cg01359532	NM_000761	CYP1A2	Body	NA	NA	0.591342	0.196609	-0.66752	7.50947e-08	2.23042e-05
cg08915922	NM_001127714	HIVEP3	5'UTR	chr1:42127380-42128632	Island	0.104826	0.0385364	-0.632377	7.52818e-08	2.23429e-05
cg25308508	NA	NA	NA	NA	NA	0.234563	0.565918	1.41265	7.57494e-08	2.24477e-05
cg08468401	NA	NA	NA	NA	NA	0.25614	0.109918	-0.570866	7.57464e-08	2.24638e-05
cg06626750	NM_006924	SRSF1	Body	chr17:56083750-56085373	N_Shore	0.704571	0.257809	-0.634091	7.59593e-08	2.24929e-05
cg12418947	NM_001002914	KCTD11	TSS200	chr17:7254622-7255808	Island	0.21845	0.0693091	-0.682724	7.64445e-08	2.25855e-05
cg20254718	NM_000801	FKBP1A	Body	chr20:1373259-1373917	N_Shelf	0.437636	0.148473	-0.660739	7.6416e-08	2.25941e-05
cg03534410	NM_018306	TMEM40	TSS1500	NA	NA	0.594495	0.296509	-0.501242	7.67822e-08	2.26682e-05
cg13442606	NM_001014437	CARS	Body	NA	NA	0.585562	0.202655	-0.653914	7.77653e-08	2.29068e-05
cg20448706	NM_004274	AKAP6	Body	NA	NA	0.440465	0.147682	-0.664714	7.80903e-08	2.29853e-05
cg25143990	NA	NA	NA	NA	NA	0.0471504	0.467827	8.92201	8.01829e-08	2.35307e-05
cg23204384	NM_001011878	DEFB121	TSS200	NA	NA	0.223869	0.0774364	-0.6541	8.03709e-08	2.35682e-05
cg17292622	NA	NA	NA	NA	NA	0.247897	0.620655	1.50368	8.07109e-08	2.36503e-05
cg26224018	NM_020925	CACHD1	Body	NA	NA	0.616677	0.2828	-0.541413	8.11674e-08	2.37663e-05
cg08233235	NM_001136135	RPL28	Body	chr19:55895262-55898164	S_Shore	0.633047	0.250564	-0.604194	8.12691e-08	2.37784e-05
cg20655792	NM_001784	ADGRE5	Body	chr19:14516726-14517464	Island	0.60605	0.281018	-0.536312	8.15958e-08	2.38562e-05
cg05885012	NM_017949	NA	5'UTR	NA	NA	0.102419	0.0409455	-0.600218	8.18711e-08	2.38656e-05
cg01157871	NA	NA	NA	NA	NA	0.102697	0.0386273	-0.623873	8.18426e-08	2.3875e-05
cg27074041	NM_006186	NR4A2	Body	chr2:157184389-157184632	Island	0.420315	0.746355	0.775703	8.20137e-08	2.38894e-05
cg05705094	NA	NA	NA	NA	NA	0.0514814	0.0240636	-0.532576	8.23847e-08	2.39797e-05
cg10639411	NA	NA	NA	NA	NA	0.354415	0.142318	-0.598442	8.24482e-08	2.39804e-05
cg24891846	NM_001127221	CACNA1A	Body	chr19:13319268-13319789	Island	0.272612	0.0637364	-0.766201	8.25144e-08	2.39819e-05
cg17345741	NA	NA	NA	NA	NA	0.572415	0.1773	-0.69026	8.25931e-08	2.3987e-05
cg20320656	NM_001024668	LETMD1	Body	chr12:51441598-51442187	S_Shore	0.535516	0.177336	-0.66885	8.27881e-08	2.40259e-05
cg10900663	NA	NA	NA	NA	NA	0.642208	0.31	-0.51729	8.2877e-08	2.40339e-05
cg08490663	NA	NA	NA	NA	NA	0.0761699	0.0295273	-0.61235	8.2948e-08	2.40367e-05
cg18105361	NA	NA	NA	NA	NA	0.516644	0.210073	-0.59339	8.35416e-08	2.41375e-05
cg07618900	NM_032735	BEST3	TSS200	NA	NA	0.597643	0.220709	-0.630701	8.35217e-08	2.41495e-05
cg26435670	NM_004329	BMPR1A	TSS1500	chr10:88515426-88517217	N_Shore	0.227801	0.0668273	-0.706642	8.35038e-08	2.41621e-05
cg14095100	NM_005077	TLE1	1stExon	chr9:84302139-84305001	Island	0.144733	0.252664	0.745725	8.42565e-08	2.42904e-05
cg09577804	NA	NA	NA	NA	NA	0.127419	0.0520909	-0.591183	8.44674e-08	2.43334e-05
cg20661257	NA	NA	NA	NA	NA	0.353035	0.790482	1.23911	8.5066e-08	2.44699e-05
cg15703512	NM_173806	PDZD9	TSS200	NA	NA	0.137962	0.0565818	-0.589874	8.50052e-08	2.44703e-05
cg11057378	NM_005729	PPIF	TSS200	chr10:81107082-81107488	N_Shore	0.0937912	0.0372909	-0.602405	8.5296e-08	2.45181e-05
cg18650307	NM_017741	DCAF16	5'UTR	chr4:17811954-17813227	N_Shelf	0.749616	0.266991	-0.64383	8.59774e-08	2.46778e-05
cg25564800	NR_026698	KPNA1	TSS1500	chr3:122233408-122233944	S_Shore	0.191966	0.0507364	-0.735702	8.59769e-08	2.46957e-05
cg05755017	NM_153201	HSPA8	Body	chr11:122932173-122933803	N_Shelf	0.577016	0.204264	-0.646	8.63173e-08	2.47573e-05
cg26713775	NM_138443	HAUS1	Body	chr18:43684113-43684847	S_Shore	0.511358	0.241627	-0.527479	8.67947e-08	2.48761e-05
cg04521004	NM_001163678	SHOX2	Body	chr3:157821232-157821604	Island	0.192029	0.504045	1.62484	8.69631e-08	2.49062e-05
cg23679615	NM_001077511	TCF19	5'UTR	chr6:31125894-31126561	S_Shore	0.17673	0.0528909	-0.700725	8.80751e-08	2.52062e-05
cg10918927	NM_014620	HOXC4	1stExon	chr12:54411709-54412131	N_Shore	0.140971	0.0691273	-0.509634	8.82456e-08	2.52366e-05
cg16255697	NM_000868	HTR2C	Body	NA	NA	0.779996	0.387773	-0.502853	8.85381e-08	2.52834e-05
cg03568507	NM_006037	HDAC4	Body	chr2:240153476-240153792	Island	0.20478	0.558018	1.72497	8.86963e-08	2.53102e-05
cg19271142	NA	NA	NA	NA	NA	0.55125	0.8547	0.550475	8.90925e-08	2.53864e-05
cg18561976	NM_012092	ICOS	1stExon	NA	NA	0.385322	0.753927	0.956616	8.92849e-08	2.54228e-05
cg12960305	NM_001122681	SH3BP2	TSS200	chr4:2794494-2794875	Island	0.128976	0.0251182	-0.805249	8.93776e-08	2.54307e-05
cg16792613	NM_005892	FMNL1	3'UTR	chr17:43324689-43325729	N_Shore	0.345707	0.1146	-0.668505	8.95215e-08	2.54348e-05
cg06067593	NM_201592	GPM6A	Body	chr4:176922473-176922820	N_Shelf	0.68867	0.322273	-0.532036	8.97906e-08	2.54928e-05
cg10491452	NA	NA	NA	NA	NA	0.37582	0.785818	1.09094	9.02601e-08	2.55891e-05
cg03706175	NM_002354	EPCAM	Body	chr2:47596629-47597256	S_Shore	0.636715	0.249073	-0.608816	9.02297e-08	2.55989e-05
cg16592658	NM_005755	EBI3	Body	NA	NA	0.516039	0.214891	-0.583576	9.13276e-08	2.58358e-05
cg15672022	NA	NA	NA	NA	NA	0.526928	0.794427	0.507657	9.14134e-08	2.58414e-05
cg25045219	NM_001013672	C17orf97	Body	chr17:263083-263412	Island	0.313305	0.700418	1.23558	9.17247e-08	2.59108e-05
cg01792666	NM_006662	SRCAP	5'UTR	chr16:30709274-30710364	S_Shore	0.16865	0.0625182	-0.629303	9.22689e-08	2.60458e-05
cg05317686	NA	NA	NA	NA	NA	0.0681628	0.0297364	-0.563745	9.25342e-08	2.61019e-05
cg24202468	NM_001032296	STK24	Body	NA	NA	0.453905	0.722127	0.590921	9.31179e-08	2.62288e-05
cg12526091	NA	NA	NA	NA	NA	0.329204	0.623445	0.893799	9.30728e-08	2.6235e-05
cg16598405	NM_004639	BAG6	TSS1500	chr6:31619856-31620525	S_Shore	0.140498	0.0626273	-0.554249	9.32919e-08	2.62402e-05
cg26819695	NM_024769	CLMP	TSS1500	chr11:123066517-123066986	Island	0.1976	0.512264	1.59243	9.3252e-08	2.62478e-05
cg22365167	NM_024060	AHNAK	5'UTR	NA	NA	0.170179	0.0509273	-0.700742	9.41581e-08	2.64271e-05
cg07788369	NR_015448	DLX6-AS1	Body	NA	NA	0.215029	0.537927	1.50165	9.49317e-08	2.66251e-05
cg08656816	NM_002985	CCL5	TSS200	NA	NA	0.563258	0.128309	-0.772202	9.59275e-08	2.68661e-05
cg04445214	NM_001135911	PIK3IP1	1stExon	chr22:31686636-31687371	S_Shore	0.10244	0.0335727	-0.672269	9.65734e-08	2.70084e-05
cg17939040	NM_198836	ACACA	Body	NA	NA	0.924077	0.338082	-0.634141	9.68403e-08	2.70445e-05
cg25790850	NM_175709	CBX7	Body	chr22:39541022-39542137	Island	0.0874416	0.0369818	-0.577068	9.67963e-08	2.70515e-05
cg13298167	NM_019618	IL36G	TSS200	NA	NA	0.674428	0.313473	-0.535202	9.78007e-08	2.72546e-05
cg23463608	NM_052847	GNG7	5'UTR	chr19:2607725-2607967	Island	0.342677	0.0608	-0.822573	9.76839e-08	2.72608e-05
cg05571581	NA	NA	NA	NA	NA	0.0708204	0.470391	5.64203	9.77728e-08	2.72662e-05
cg06096805	NM_001035254	FAM102A	TSS1500	chr9:130742515-130743486	S_Shore	0.635035	0.274709	-0.567411	9.87348e-08	2.74565e-05
cg24698536	NM_001161330	SSH1	Body	chr12:109251205-109251586	N_Shore	0.401624	0.0872455	-0.782768	9.88878e-08	2.74795e-05
cg19077494	NM_001111067	ACVR1	5'UTR	NA	NA	0.495164	0.857191	0.731126	9.90206e-08	2.7497e-05
cg06083330	NM_004575	POU4F2	Body	chr4:147559205-147561901	Island	0.102734	0.5733	4.58045	9.9772e-08	2.76665e-05
cg10077400	NM_020315	PDXP	Body	chr22:38054403-38055450	Island	0.0848814	0.0268091	-0.684158	1.01306e-07	2.80523e-05
cg22103219	NM_020979	SH2B2	Body	chr7:101936317-101936548	N_Shore	0.284246	0.0726182	-0.744523	1.02448e-07	2.8249e-05
cg03917666	NA	NA	NA	NA	NA	0.642391	0.176373	-0.725443	1.03536e-07	2.84889e-05
cg25547772	NM_001013742	DGKK	5'UTR	chrX:50213658-50213983	Island	0.240647	0.485655	1.01812	1.03852e-07	2.8536e-05
cg14209244	NM_015110	SMC5	Body	chr9:72873689-72874264	S_Shelf	0.795719	0.373318	-0.530841	1.0597e-07	2.90163e-05
cg01381846	NM_152739	HOXA9	1stExon	chr7:27203915-27206462	Island	0.178205	0.549973	2.08617	1.0607e-07	2.90236e-05
cg01678292	NM_000037	ANK1	Body	NA	NA	0.703452	0.287345	-0.591521	1.06247e-07	2.90314e-05
cg22416074	NM_152486	SAMD11	Body	chr1:875730-878363	Island	0.0871106	0.0374909	-0.569617	1.0624e-07	2.90497e-05
cg18319984	NA	NA	NA	NA	NA	0.328566	0.158727	-0.51691	1.06439e-07	2.90637e-05
cg17631150	NM_014026	DCPS	TSS1500	chr11:126173539-126174042	N_Shore	0.430019	0.177609	-0.586974	1.0681e-07	2.91043e-05
cg07007382	NA	NA	NA	NA	NA	0.222588	0.0519273	-0.766711	1.06754e-07	2.91093e-05
cg23483512	NA	NA	NA	NA	NA	0.159789	0.0412091	-0.742104	1.0708e-07	2.91375e-05
cg11760500	NM_005238	ETS1	Body	NA	NA	0.658735	0.209209	-0.682408	1.08551e-07	2.94153e-05
cg15682807	NM_004867	ITM2A	1stExon	NA	NA	0.167321	0.380073	1.27152	1.09113e-07	2.95473e-05
cg08979319	NM_005068	SIM1	Body	chr6:100895773-100896062	Island	0.338119	0.584527	0.72876	1.09396e-07	2.95628e-05
cg02563156	NM_201555	FHL2	3'UTR	NA	NA	0.370099	0.717682	0.939161	1.09394e-07	2.95826e-05
cg14189441	NA	NA	NA	NA	NA	0.777355	0.280745	-0.638845	1.09687e-07	2.96006e-05
cg06993761	NM_003114	SPAG1	TSS1500	chr8:101170161-101170827	N_Shore	0.119451	0.0483	-0.595651	1.09875e-07	2.96108e-05
cg10817441	NM_002800	PSMB9	Body	chr6:32820849-32822370	S_Shore	0.717651	0.354655	-0.505812	1.0997e-07	2.96158e-05
cg11774624	NM_178819	GPAT4	3'UTR	NA	NA	0.884689	0.388509	-0.560853	1.09867e-07	2.9629e-05
cg24504361	NM_002273	KRT8	Body	chr12:53297442-53297824	S_Shore	0.464052	0.160309	-0.654545	1.10668e-07	2.97632e-05
cg10061906	NM_030580	ZNF34	TSS1500	chr8:146012190-146012913	S_Shore	0.796747	0.394845	-0.504428	1.11272e-07	2.98234e-05
cg26472133	NA	NA	NA	NA	NA	0.133103	0.496727	2.73191	1.11112e-07	2.98417e-05
cg12610471	NM_172242	SPAG6	TSS200	chr10:22634000-22634862	Island	0.206502	0.532718	1.57973	1.11267e-07	2.98423e-05
cg19435284	NA	NA	NA	NA	NA	0.152012	0.436418	1.87094	1.11503e-07	2.98447e-05
cg15892650	NM_004033	ANXA6	Body	NA	NA	0.716436	0.317427	-0.556936	1.11216e-07	2.98491e-05
cg24704287	NA	NA	NA	NA	NA	0.637467	0.178527	-0.719943	1.11657e-07	2.98654e-05
cg00458932	NA	NA	NA	NA	NA	0.540252	0.114782	-0.78754	1.12774e-07	3.01231e-05
cg26751356	NA	NA	NA	NA	NA	0.172377	0.518209	2.00625	1.1293e-07	3.01445e-05
cg18842353	NA	NA	NA	NA	NA	0.714448	0.211436	-0.704056	1.13176e-07	3.01894e-05
cg16197388	NM_021016	PSG3	3'UTR	NA	NA	0.460154	0.190027	-0.587035	1.13672e-07	3.02601e-05
cg11731626	NM_006019	TCIRG1	TSS200	chr11:67806251-67806611	Island	0.170014	0.0460636	-0.72906	1.15187e-07	3.06011e-05
cg20411813	NM_001231	CASQ1	Body	NA	NA	0.303612	0.0977	-0.678208	1.15185e-07	3.06214e-05
cg15920975	NA	NA	NA	NA	NA	0.53892	0.128718	-0.761155	1.16146e-07	3.07725e-05
cg01286930	NM_003128	SPTBN1	Body	chr2:54785026-54785969	N_Shore	0.485385	0.7861	0.619539	1.16259e-07	3.07819e-05
cg12178669	NM_001145263	NCOA4	5'UTR	chr10:51565071-51565648	S_Shore	0.231006	0.110873	-0.520044	1.17165e-07	3.09591e-05
cg01605984	NM_133640	MED22	TSS1500	chr9:136214430-136215760	S_Shore	0.599671	0.285482	-0.523936	1.18167e-07	3.10775e-05
cg04229928	NA	NA	NA	NA	NA	0.569624	0.260764	-0.542218	1.18108e-07	3.10828e-05
cg00164898	NM_002751	MAPK11	TSS1500	chr22:50708190-50710490	Island	0.0490531	0.0237273	-0.516294	1.18062e-07	3.10916e-05
cg14426510	NM_016424	LUC7L3	TSS1500	chr17:48796750-48797317	N_Shore	0.0846301	0.0418364	-0.505656	1.17834e-07	3.10941e-05
cg22788465	NM_000588	IL3	3'UTR	NA	NA	0.566956	0.221591	-0.609157	1.18463e-07	3.11344e-05
cg23550082	NM_021944	C14orf93	TSS1500	chr14:23479310-23479532	S_Shore	0.13361	0.0444909	-0.667008	1.19265e-07	3.12614e-05
cg22112435	NM_017739	POMGNT1	TSS1500	NA	NA	0.139927	0.0399636	-0.714396	1.19207e-07	3.12671e-05
cg07230446	NM_001103146	GIGYF2	TSS1500	chr2:233562005-233562547	N_Shore	0.0865027	0.0310545	-0.640999	1.1905e-07	3.12677e-05
cg06282524	NA	NA	NA	NA	NA	0.134488	0.371445	1.76193	1.20431e-07	3.1546e-05
cg24337701	NM_031466	TRAPPC9	Body	NA	NA	0.459534	0.779736	0.696799	1.20663e-07	3.15859e-05
cg04663916	NM_032565	EBPL	TSS1500	chr13:50265224-50265598	S_Shore	0.158411	0.0573182	-0.638167	1.20762e-07	3.15906e-05
cg09282085	NR_000026	SNORD139	TSS200	chr22:39715473-39715945	N_Shelf	0.668516	0.309655	-0.536803	1.21207e-07	3.16437e-05
cg26221105	NM_001748	CAPN2	Body	NA	NA	0.142026	0.0450273	-0.682964	1.21665e-07	3.17213e-05
cg15267232	NM_002051	GATA3	Body	chr10:8091374-8098329	Island	0.218647	0.638527	1.92036	1.21629e-07	3.17328e-05
cg13214937	NA	NA	NA	NA	NA	0.120096	0.421355	2.50849	1.22774e-07	3.19678e-05
cg18568145	NM_198264	FAM189B	TSS1500	chr1:155224624-155225655	S_Shore	0.299377	0.0575455	-0.807783	1.23314e-07	3.20447e-05
cg23042318	NR_027271	CIRBP-AS1	TSS200	chr19:1265854-1269943	S_Shore	0.0964018	0.0387182	-0.598366	1.23849e-07	3.21411e-05
cg14076195	NM_203401	STMN1	TSS1500	chr1:26231950-26233624	Island	0.109745	0.0364182	-0.668157	1.23846e-07	3.21618e-05
cg15211996	NM_080431	ACTRT2	TSS1500	chr1:2938633-2939043	N_Shore	0.712391	0.292618	-0.589245	1.25836e-07	3.25494e-05
cg20809067	NM_016376	ANKFY1	Body	chr17:4166705-4167353	N_Shore	0.160494	0.0604364	-0.623435	1.26528e-07	3.26852e-05
cg24866792	NR_026760	BPIFA4P	TSS200	NA	NA	0.542973	0.224864	-0.585866	1.27833e-07	3.29789e-05
cg17417004	NM_001009955	SSBP3	Body	chr1:54821990-54822333	N_Shore	0.423217	0.680827	0.608696	1.29387e-07	3.3336e-05
cg14781394	NA	NA	NA	NA	NA	0.227104	0.0869818	-0.616996	1.30606e-07	3.3606e-05
cg15091337	NM_019896	POLE4	TSS1500	chr2:75185567-75186177	N_Shore	0.107125	0.0475364	-0.556252	1.31098e-07	3.37107e-05
cg21257950	NA	NA	NA	NA	NA	0.0764947	0.0254091	-0.667832	1.31688e-07	3.38402e-05
cg06469345	NM_000798	DRD5	TSS200	chr4:9783035-9784960	Island	0.0695354	0.3353	3.822	1.32376e-07	3.39723e-05
cg16345226	NM_024104	SMIM7	TSS1500	chr19:16770636-16772632	Island	0.262711	0.0966455	-0.632122	1.33553e-07	3.41628e-05
cg20173011	NA	NA	NA	NA	NA	0.724088	0.246264	-0.659898	1.33776e-07	3.41975e-05
cg23028436	NM_015000	STK38L	TSS200	chr12:27396982-27397646	Island	0.268687	0.0702818	-0.738425	1.34445e-07	3.4324e-05
cg22331862	NM_014229	SLC6A11	TSS200	chr3:10857687-10858447	Island	0.306192	0.488309	0.594781	1.34544e-07	3.43269e-05
cg22995106	NM_015386	COG4	TSS1500	chr16:70557089-70557486	S_Shore	0.107555	0.0483273	-0.550673	1.357e-07	3.45769e-05
cg22235258	NM_012153	EHF	Body	NA	NA	0.736053	0.364827	-0.504347	1.36004e-07	3.4587e-05
cg05240350	NA	NA	NA	NA	NA	0.624115	0.209755	-0.663917	1.35845e-07	3.45913e-05
cg07149022	NA	NA	NA	NA	NA	0.237622	0.0560182	-0.764255	1.3865e-07	3.51688e-05
cg24504423	NM_002061	GCLM	Body	chr1:94374369-94375467	N_Shore	0.192689	0.0642364	-0.666633	1.39107e-07	3.5262e-05
cg26933866	NA	NA	NA	NA	NA	0.284867	0.674236	1.36684	1.39619e-07	3.5346e-05
cg23262218	NA	NA	NA	NA	NA	0.216687	0.553191	1.55295	1.39551e-07	3.53516e-05
cg25393494	NM_178836	PLD6	TSS1500	chr17:17109893-17110296	Island	0.59477	0.200218	-0.663369	1.40193e-07	3.54457e-05
cg13171565	NM_031299	CDCA3	5'UTR	chr12:6961005-6961873	N_Shore	0.16291	0.0759273	-0.53393	1.40331e-07	3.54577e-05
cg01839993	NM_019058	DDIT4	Body	chr10:74033167-74034698	Island	0.253882	0.110664	-0.564114	1.41529e-07	3.57144e-05
cg00089945	NM_198551	MIA3	Body	chr1:222817467-222817671	N_Shore	0.536969	0.222609	-0.585434	1.42204e-07	3.58157e-05
cg25734089	NM_001103149	PNMA8A	3'UTR	NA	NA	0.660019	0.1873	-0.71622	1.42324e-07	3.58231e-05
cg14855292	NM_207121	FAM110A	5'UTR	chr20:825267-826276	Island	0.123444	0.0557455	-0.548416	1.43981e-07	3.60781e-05
cg09610569	NM_032539	SLITRK2	5'UTR	chrX:144899363-144900266	Island	0.182377	0.470664	1.58072	1.43919e-07	3.60856e-05
cg18251245	NM_017943	FBXO34	TSS200	chr14:55737940-55738999	N_Shore	0.0738248	0.0341273	-0.537726	1.43787e-07	3.60988e-05
cg22953759	NM_001164440	ANKRD33B	Body	NA	NA	0.506522	0.155727	-0.692556	1.43884e-07	3.60999e-05
cg12537796	NA	NA	NA	NA	NA	0.260562	0.574718	1.20569	1.4461e-07	3.62128e-05
cg26597242	NM_000806	GABRA1	5'UTR	NA	NA	0.24089	0.684464	1.84139	1.45139e-07	3.62989e-05
cg05408284	NM_032151	PCBD2	TSS1500	chr5:134240254-134241314	N_Shore	0.270157	0.0573636	-0.787665	1.46259e-07	3.65093e-05
cg27168493	NM_144701	IL23R	Body	NA	NA	0.390342	0.690736	0.769569	1.4802e-07	3.68318e-05
cg21199093	NM_005095	ZMYM4	Body	NA	NA	0.333095	0.724609	1.17538	1.4802e-07	3.6855e-05
cg11665991	NA	NA	NA	NA	NA	0.182092	0.463155	1.54352	1.48011e-07	3.68761e-05
cg13217661	NA	NA	NA	NA	NA	0.283175	0.525209	0.854714	1.48954e-07	3.70172e-05
cg12153480	NM_001967	EIF4A2	Body	chr3:186500738-186502048	S_Shelf	0.726783	0.225518	-0.689704	1.5008e-07	3.72734e-05
cg18836847	NM_006088	TUBB4B	Body	chr9:140134706-140136568	Island	0.131516	0.0609818	-0.536316	1.50796e-07	3.7404e-05
cg27176614	NM_000101	CYBA	TSS1500	chr16:88716989-88717606	S_Shore	0.293481	0.0965182	-0.671127	1.51107e-07	3.74575e-05
cg15046693	NM_001806	CEBPG	TSS1500	chr19:33864176-33865010	N_Shore	0.559041	0.219864	-0.606713	1.51763e-07	3.75964e-05
cg15622672	NA	NA	NA	NA	NA	0.061823	0.0249182	-0.596943	1.53246e-07	3.78682e-05
cg27055894	NM_005427	TP73	5'UTR	NA	NA	0.416054	0.206573	-0.503495	1.55893e-07	3.83773e-05
cg07695771	NA	NA	NA	NA	NA	0.31333	0.136409	-0.564647	1.56108e-07	3.84062e-05
cg20676047	NM_001025234	TSPAN4	Body	chr11:858575-858932	N_Shore	0.698898	0.178018	-0.745287	1.56422e-07	3.84594e-05
cg02737554	NA	NA	NA	NA	NA	0.7117	0.284027	-0.600917	1.57485e-07	3.86965e-05
cg03202526	NM_005634	SOX3	TSS200	chrX:139585867-139588578	Island	0.266699	0.614682	1.30478	1.57644e-07	3.87112e-05
cg25197194	NM_024768	EFCC1	3'UTR	NA	NA	0.287466	0.7328	1.54917	1.58499e-07	3.88969e-05
cg01330762	NM_014297	ETHE1	Body	chr19:44031127-44031504	N_Shore	0.124769	0.0282	-0.773982	1.59778e-07	3.91129e-05
cg04361126	NM_014585	SLC40A1	TSS1500	chr2:190445459-190445983	S_Shore	0.345433	0.661882	0.916095	1.59923e-07	3.91242e-05
cg10385390	NM_001123377	PARK7	5'UTR	chr1:8021301-8022226	S_Shore	0.362197	0.117536	-0.675491	1.59733e-07	3.91265e-05
cg20388580	NA	NA	NA	NA	NA	0.259278	0.0901818	-0.652181	1.60331e-07	3.91995e-05
cg21207958	NM_005634	SOX3	1stExon	chrX:139585867-139588578	Island	0.13716	0.440136	2.20892	1.60979e-07	3.93334e-05
cg23013850	NM_001122779	FAM124B	1stExon	NA	NA	0.402931	0.750427	0.862421	1.62116e-07	3.95622e-05
cg15415194	NA	NA	NA	NA	NA	0.566742	0.182436	-0.678097	1.62662e-07	3.96214e-05
cg00502597	NM_001113411	FGGY	Body	NA	NA	0.251118	0.555809	1.21334	1.63204e-07	3.97042e-05
cg19760241	NM_005568	LHX1	Body	chr17:35291899-35300875	Island	0.17635	0.6529	2.70229	1.63314e-07	3.97063e-05
cg12670347	NM_080717	TBX5	TSS1500	chr12:114845861-114847650	Island	0.184341	0.628809	2.41112	1.6347e-07	3.97197e-05
cg15060599	NA	NA	NA	NA	NA	0.148604	0.496427	2.3406	1.64297e-07	3.98713e-05
cg08169020	NM_004926	ZFP36L1	Body	chr14:69256676-69257036	Island	0.364873	0.0535364	-0.853274	1.64266e-07	3.98883e-05
cg04982781	NR_000026	SNORD139	TSS1500	chr22:39715473-39715945	N_Shore	0.561351	0.259364	-0.537966	1.65023e-07	3.9998e-05
cg01422881	NM_018150	RNF220	5'UTR	chr1:44871109-44874047	Island	0.212304	0.510082	1.40261	1.67017e-07	4.03071e-05
cg11071202	NA	NA	NA	NA	NA	0.194759	0.602536	2.09375	1.66727e-07	4.03115e-05
cg07965110	NA	NA	NA	NA	NA	0.276612	0.0815727	-0.7051	1.67773e-07	4.04647e-05
cg27217742	NM_002926	RGS12	Body	chr4:3365194-3365415	Island	0.353828	0.548191	0.549313	1.68724e-07	4.06442e-05
cg11145826	NM_001039675	UNC45A	5'UTR	chr15:91478117-91478983	N_Shore	0.531825	0.263509	-0.504519	1.69016e-07	4.06895e-05
cg06218688	NM_001111018	NAV2	Body	chr11:19798537-19798949	S_Shore	0.153443	0.0575727	-0.624795	1.69704e-07	4.08301e-05
cg02798576	NA	NA	NA	NA	NA	0.115096	0.568682	3.94095	1.71043e-07	4.10517e-05
cg20570611	NM_006186	NR4A2	Body	chr2:157184389-157184632	Island	0.501289	0.780236	0.556459	1.72148e-07	4.12917e-05
cg03238981	NA	NA	NA	NA	NA	0.212147	0.0861091	-0.594106	1.72297e-07	4.13021e-05
cg06930757	NM_016148	SHANK1	Body	chr19:51220054-51220298	N_Shelf	0.292828	0.560464	0.913967	1.73802e-07	4.15868e-05
cg25817111	NA	NA	NA	NA	NA	0.538561	0.204109	-0.62101	1.73742e-07	4.15978e-05
cg27578439	NM_016078	TVP23B	TSS1500	chr17:18684525-18685009	N_Shore	0.73894	0.274218	-0.628903	1.74661e-07	4.1716e-05
cg22724063	NM_014641	MDC1	5'UTR	chr6:30684836-30685503	N_Shore	0.113514	0.0427364	-0.623515	1.77313e-07	4.22722e-05
cg25103895	NM_032804	ADO	1stExon	chr10:64564435-64565818	Island	0.420881	0.203727	-0.51595	1.77989e-07	4.24077e-05
cg12523109	NM_001009616	SPANXN5	3'UTR	NA	NA	0.679977	0.213782	-0.685604	1.80111e-07	4.28094e-05
cg16422365	NA	NA	NA	NA	NA	0.609763	0.225255	-0.630587	1.80662e-07	4.28885e-05
cg18956706	NM_032538	TTBK1	Body	chr6:43214369-43214591	S_Shore	0.0429752	0.0172818	-0.597866	1.80953e-07	4.29057e-05
cg24038192	NM_001113239	HIPK2	Body	NA	NA	0.338297	0.601273	0.77735	1.8283e-07	4.32462e-05
cg07645296	NM_002223	ITPR2	TSS1500	chr12:26985453-26986304	S_Shore	0.226958	0.654609	1.88427	1.82782e-07	4.32609e-05
cg01967642	NM_001099439	EPHA10	Body	chr1:38229838-38230888	N_Shore	0.581107	0.165564	-0.715089	1.83988e-07	4.34417e-05
cg26155492	NM_031936	GPR61	TSS200	NA	NA	0.654521	0.312855	-0.52201	1.85523e-07	4.36989e-05
cg15193228	NM_174975	SEC14L3	3'UTR	NA	NA	0.493413	0.179836	-0.635526	1.86389e-07	4.37718e-05
cg01485797	NR_002585	SNORA52	TSS1500	chr11:809202-810509	S_Shore	0.171101	0.0626182	-0.634028	1.8634e-07	4.37864e-05
cg00553487	NM_002088	GRIK5	TSS1500	NA	NA	0.659366	0.273245	-0.585594	1.86268e-07	4.37956e-05
cg14673618	NM_005413	SIX3	Body	chr2:45169505-45171884	Island	0.241905	0.606809	1.50846	1.87011e-07	4.3839e-05
cg07112604	NM_001080414	CCDC88C	Body	NA	NA	0.471027	0.142082	-0.698358	1.88334e-07	4.40441e-05
cg23685102	NM_018476	BEX1	5'UTR	chrX:102318601-102319304	Island	0.295778	0.573755	0.939816	1.88635e-07	4.40618e-05
cg10588962	NR_033201	HOXB-AS3	TSS1500	chr17:46669434-46669811	N_Shore	0.226558	0.727573	2.21143	1.88331e-07	4.40695e-05
cg00126498	NM_025218	ULBP1	Body	chr6:150284682-150286515	S_Shore	0.485743	0.742064	0.527687	1.88237e-07	4.40739e-05
cg16619193	NM_014002	IKBKE	TSS1500	NA	NA	0.361262	0.131345	-0.636426	1.88236e-07	4.41e-05
cg01308913	NA	NA	NA	NA	NA	0.216687	0.508564	1.347	1.89038e-07	4.41036e-05
cg04309234	NA	NA	NA	NA	NA	0.259019	0.711173	1.74564	1.90121e-07	4.43037e-05
cg05828690	NM_001001795	C8orf82	3'UTR	chr8:145751955-145756326	Island	0.0584106	0.0234727	-0.598143	1.90013e-07	4.43048e-05
cg08309251	NM_001127491	ITGB2	5'UTR	chr21:46351328-46352911	N_Shelf	0.532551	0.152355	-0.713916	1.91819e-07	4.45935e-05
cg10188048	NM_005027	PIK3R2	Body	chr19:18271738-18272232	Island	0.319706	0.125518	-0.607395	1.94131e-07	4.49713e-05
cg15456206	NM_207115	ZNF580	TSS1500	chr19:56151516-56152792	Island	0.21843	0.103391	-0.526664	1.9369e-07	4.49752e-05
cg05065926	NM_173832	ZFP41	5'UTR	chr8:144328103-144329545	S_Shore	0.191632	0.0770364	-0.597998	1.93951e-07	4.49826e-05
cg19424265	NM_207121	FAM110A	5'UTR	chr20:825267-826276	Island	0.0747956	0.0308455	-0.587603	1.95017e-07	4.50967e-05
cg02761110	NM_015520	MAGI1	Body	NA	NA	0.837106	0.3651	-0.563855	1.96002e-07	4.5271e-05
cg18119977	NA	NA	NA	NA	NA	0.197782	0.463882	1.34542	1.96434e-07	4.53441e-05
cg18399427	NM_012401	PLXNB2	Body	chr22:50725469-50725818	N_Shore	0.734031	0.350382	-0.522661	1.99409e-07	4.58959e-05
cg18650518	NM_001047434	DPH3	3'UTR	NA	NA	0.426945	0.751791	0.760861	1.99633e-07	4.59207e-05
cg10243567	NA	NA	NA	NA	NA	0.48774	0.738855	0.514854	2.0292e-07	4.66222e-05
cg13241663	NA	NA	NA	NA	NA	0.726804	0.294136	-0.595302	2.03417e-07	4.66544e-05
cg17066531	NM_153370	PI16	5'UTR	NA	NA	0.407516	0.687509	0.687073	2.04704e-07	4.68673e-05
cg14620234	NA	NA	NA	NA	NA	0.690863	0.277373	-0.598513	2.04624e-07	4.68765e-05
cg13586051	NM_004944	DNASE1L3	TSS200	NA	NA	0.277459	0.111145	-0.599417	2.05918e-07	4.70904e-05
cg20840847	NM_001130414	APBA2	TSS1500	NA	NA	0.425379	0.7614	0.789934	2.06249e-07	4.71386e-05
cg12065799	NM_022157	RRAGC	Body	chr1:39324815-39325721	N_Shore	0.166157	0.0433	-0.739403	2.06578e-07	4.71589e-05
cg20878850	NM_000044	AR	TSS200	chrX:66763684-66764077	Island	0.147728	0.343173	1.323	2.07757e-07	4.74006e-05
cg25624927	NM_000387	SLC25A20	TSS200	chr3:48936041-48936457	S_Shore	0.0652398	0.0228545	-0.649684	2.08249e-07	4.74026e-05
cg26608718	NM_014371	AKAP8L	TSS1500	chr19:15529290-15529902	S_Shore	0.401696	0.140982	-0.649033	2.08098e-07	4.74232e-05
cg09585333	NM_001098784	FAM89B	Body	chr11:65341620-65342501	N_Shore	0.42374	0.170636	-0.597309	2.08494e-07	4.7431e-05
cg19329160	NA	NA	NA	NA	NA	0.117979	0.423145	2.58662	2.08636e-07	4.74358e-05
cg18008247	NM_020733	HEG1	Body	NA	NA	0.789856	0.345955	-0.562003	2.08033e-07	4.74359e-05
cg21232937	NR_029683	MIR142	TSS200	NA	NA	0.129676	0.406109	2.13172	2.09042e-07	4.7473e-05
cg24711224	NM_022455	NSD1	5'UTR	chr5:176558852-176561652	S_Shore	0.136447	0.0376364	-0.724168	2.09956e-07	4.7598e-05
cg04451880	NA	NA	NA	NA	NA	0.459433	0.806727	0.75592	2.11007e-07	4.77811e-05
cg08162803	NM_006019	TCIRG1	TSS200	chr11:67806251-67806611	Island	0.165921	0.0417	-0.748676	2.1289e-07	4.81798e-05
cg12459502	NM_000633	BCL2	Body	NA	NA	0.341693	0.761345	1.22816	2.13506e-07	4.82913e-05
cg20371378	NM_001145841	TNNI2	TSS1500	NA	NA	0.592679	0.284491	-0.519991	2.15063e-07	4.85597e-05
cg15887709	NA	NA	NA	NA	NA	0.170707	0.377536	1.2116	2.1504e-07	4.85824e-05
cg20607293	NA	NA	NA	NA	NA	0.322493	0.114355	-0.645404	2.17146e-07	4.90017e-05
cg09631769	NA	NA	NA	NA	NA	0.714436	0.318636	-0.554003	2.17968e-07	4.91589e-05
cg10974980	NM_005576	LOXL1	Body	NA	NA	0.109424	0.556464	4.08539	2.18139e-07	4.91692e-05
cg02877240	NM_001007245	IFRD1	5'UTR	chr7:112090122-112091412	N_Shore	0.446371	0.153982	-0.655036	2.18579e-07	4.92403e-05
cg09504612	NA	NA	NA	NA	NA	0.604987	0.213809	-0.646589	2.18774e-07	4.92559e-05
cg14836602	NA	NA	NA	NA	NA	0.174129	0.499609	1.86919	2.19716e-07	4.94113e-05
cg24925929	NM_001031702	SEMA5B	Body	chr3:122640713-122641355	Island	0.0852947	0.357745	3.19423	2.21187e-07	4.97137e-05
cg21952052	NA	NA	NA	NA	NA	0.295376	0.109045	-0.630825	2.2199e-07	4.9837e-05
cg13080379	NM_152380	TBX15	5'UTR	chr1:119526782-119527192	Island	0.160949	0.481018	1.98864	2.22713e-07	4.99709e-05
cg06152434	NM_005634	SOX3	3'UTR	chrX:139585867-139588578	N_Shore	0.394786	0.678209	0.717916	2.23052e-07	4.99898e-05
cg27049094	NM_000189	HK2	Body	NA	NA	0.479394	0.812773	0.695418	2.23785e-07	5.00397e-05
cg01646665	NR_026678	TMEM79	TSS1500	NA	NA	0.41857	0.101673	-0.757095	2.24449e-07	5.01312e-05
cg25395188	NM_017966	VPS37C	3'UTR	NA	NA	0.227326	0.0971	-0.572859	2.25605e-07	5.03034e-05
cg26580869	NM_001194	HCN2	Body	chr19:611291-611579	Island	0.706335	0.179891	-0.745318	2.28565e-07	5.07904e-05
cg09212014	NM_003836	DLK1	TSS1500	chr14:101192851-101193499	N_Shore	0.781027	0.3243	-0.584777	2.31532e-07	5.12756e-05
cg00733115	NA	NA	NA	NA	NA	0.561548	0.2265	-0.596651	2.33809e-07	5.17217e-05
cg04941706	NM_018027	FRMD4A	Body	NA	NA	0.502398	0.207364	-0.587252	2.34165e-07	5.17421e-05
cg17965019	NM_003535	HIST1H3J	1stExon	chr6:27858166-27858564	Island	0.0786442	0.0284364	-0.638418	2.348e-07	5.1824e-05
cg08288811	NM_018906	PCDHA3	1stExon	chr5:140180844-140181082	Island	0.263098	0.4906	0.864703	2.37502e-07	5.23028e-05
cg00181125	NA	NA	NA	NA	NA	0.136396	0.450609	2.30367	2.37685e-07	5.23137e-05
cg00126657	NR_028366	SSX6	TSS200	NA	NA	0.783167	0.377645	-0.517797	2.3811e-07	5.2378e-05
cg00434461	NR_021490	NR2F1-AS1	Body	chr5:92906239-92908875	N_Shore	0.428208	0.7595	0.773671	2.38408e-07	5.24142e-05
cg09445472	NM_030569	ITIH5	TSS1500	NA	NA	0.179659	0.505864	1.81568	2.41023e-07	5.28116e-05
cg16829306	NM_001113348	ECE1	Body	chr1:21671360-21672319	Island	0.271355	0.0830364	-0.693993	2.40994e-07	5.28348e-05
cg12662576	NA	NA	NA	NA	NA	0.147111	0.0453364	-0.691821	2.40963e-07	5.28575e-05
cg11123720	NM_006633	IQGAP2	Body	chr5:75698759-75700160	S_Shore	0.283189	0.688182	1.43011	2.41737e-07	5.29385e-05
cg08871239	NM_031902	MRPS5	TSS1500	chr2:95787089-95787951	S_Shore	0.582227	0.230082	-0.604824	2.44498e-07	5.34538e-05
cg15464148	NM_020400	LPAR5	5'UTR	NA	NA	0.770572	0.344936	-0.552363	2.44936e-07	5.35196e-05
cg09325711	NM_005402	RALA	TSS1500	chr7:39662543-39663792	Island	0.0713195	0.0328909	-0.538823	2.47656e-07	5.40239e-05
cg16254764	NM_024827	HDAC11	TSS1500	chr3:13520912-13521319	Island	0.0959832	0.0472364	-0.507868	2.49318e-07	5.42657e-05
cg01995548	NM_033251	RPL13	Body	chr16:89626644-89627869	S_Shore	0.69438	0.296245	-0.573367	2.49617e-07	5.43008e-05
cg06964654	NA	NA	NA	NA	NA	0.22608	0.480418	1.125	2.51797e-07	5.46538e-05
cg08426962	NM_001002796	MCTP1	Body	NA	NA	0.619899	0.231845	-0.625995	2.52225e-07	5.47165e-05
cg09487931	NM_144683	DHRS13	TSS1500	chr17:27229475-27230178	S_Shore	0.0949115	0.0383909	-0.595508	2.52562e-07	5.47594e-05
cg00910893	NR_026998	LOC91450	Body	NA	NA	0.306757	0.0911636	-0.702814	2.5306e-07	5.48371e-05
cg02122540	NM_207414	MROH5	TSS1500	NA	NA	0.748393	0.340727	-0.544721	2.54872e-07	5.5108e-05
cg03289416	NM_005697	SCAMP2	TSS1500	chr15:75165373-75165903	S_Shore	0.216815	0.0644	-0.702973	2.54645e-07	5.51197e-05
cg17810765	NM_001001891	ANO7	TSS200	NA	NA	0.636235	0.304473	-0.521446	2.5529e-07	5.5168e-05
cg08543028	NA	NA	NA	NA	NA	0.611414	0.131782	-0.784464	2.57665e-07	5.55895e-05
cg06964912	NA	NA	NA	NA	NA	0.229872	0.0841909	-0.633748	2.5805e-07	5.56116e-05
cg26282347	NM_001009905	B3GNTL1	Body	chr17:80969748-80970160	N_Shore	0.816213	0.385745	-0.527396	2.58633e-07	5.57064e-05
cg01807131	NA	NA	NA	NA	NA	0.649959	0.313127	-0.518236	2.60322e-07	5.60396e-05
cg20740299	NM_005520	HNRNPH1	Body	chr5:179049815-179051611	N_Shore	0.089046	0.0407	-0.542933	2.62e-07	5.63081e-05
cg11678610	NA	NA	NA	NA	NA	0.197317	0.0636364	-0.677491	2.6193e-07	5.6324e-05
cg08832851	NM_001731	BTG1	3'UTR	chr12:92538710-92540333	N_Shelf	0.326093	0.107127	-0.671482	2.63362e-07	5.6539e-05
cg13272108	NR_002981	SNORA51	TSS1500	chr20:2632678-2633690	S_Shore	0.427363	0.1275	-0.701659	2.64159e-07	5.66481e-05
cg18277815	NM_033296	MRFAP1	3'UTR	chr4:6642194-6643322	S_Shore	0.506051	0.240382	-0.524985	2.64585e-07	5.67086e-05
cg06135480	NM_001134473	GSE1	TSS1500	chr16:85644947-85649027	N_Shore	0.149895	0.0652182	-0.564907	2.64767e-07	5.67165e-05
cg18275316	NA	NA	NA	NA	NA	0.282572	0.484818	0.715735	2.65681e-07	5.68193e-05
cg12435725	NM_007042	RPP14	5'UTR	chr3:58291813-58292385	S_Shore	0.572663	0.281027	-0.509262	2.67153e-07	5.7072e-05
cg00661523	NM_207292	MBNL1	TSS1500	chr3:151986327-151987325	N_Shore	0.316608	0.724491	1.28829	2.67589e-07	5.71031e-05
cg25354657	NR_024516	APLP2	Body	chr11:129993524-129993797	N_Shelf	0.396831	0.842427	1.12289	2.67459e-07	5.71064e-05
cg02732508	NM_033251	RPL13	Body	chr16:89626644-89627869	S_Shore	0.845398	0.348518	-0.587747	2.68409e-07	5.72469e-05
cg00463562	NM_025049	PIF1	TSS1500	chr15:65116013-65116567	S_Shore	0.17382	0.0608364	-0.650004	2.70445e-07	5.76186e-05
cg10108468	NM_022440	MAL	3'UTR	NA	NA	0.168862	0.520255	2.08095	2.70671e-07	5.76355e-05
cg23757446	NM_004852	ONECUT2	1stExon	chr18:55103154-55108853	Island	0.0991221	0.377436	2.80779	2.71806e-07	5.76583e-05
cg01866606	NA	NA	NA	NA	NA	0.101872	0.365636	2.58919	2.71281e-07	5.76714e-05
cg20731469	NM_003269	NR2E1	Body	chr6:108495654-108495986	Island	0.104556	0.467418	3.47052	2.71746e-07	5.76766e-05
cg25085755	NM_013981	NRG2	Body	NA	NA	0.488505	0.236855	-0.515144	2.72927e-07	5.78336e-05
cg17315426	NM_144985	CDH24	TSS1500	chr14:23528360-23528582	N_Shore	0.357193	0.0878273	-0.754118	2.73336e-07	5.78889e-05
cg11284959	NA	NA	NA	NA	NA	0.659936	0.270136	-0.590663	2.73755e-07	5.79153e-05
cg18608055	NM_001100122	SBNO2	Body	NA	NA	0.68846	0.191909	-0.721249	2.75501e-07	5.81594e-05
cg05428298	NM_001042430	ZC2HC1C	5'UTR	chr14:75535825-75536376	Island	0.0828699	0.0350455	-0.577103	2.75823e-07	5.81959e-05
cg18515886	NM_138348	OTULIN	Body	chr5:14664247-14664989	S_Shore	0.0542142	0.0258364	-0.523439	2.78892e-07	5.87804e-05
cg15057061	NR_004053	SOX2-OT	Body	chr3:181437184-181437478	Island	0.112493	0.445027	2.95605	2.79674e-07	5.87873e-05
cg23248887	NM_001049	SSTR1	Body	chr14:38678245-38680937	Island	0.250073	0.682864	1.73066	2.79912e-07	5.8806e-05
cg02405476	NM_181802	UBE2C	5'UTR	chr20:44440946-44441655	S_Shore	0.242169	0.114091	-0.528879	2.79183e-07	5.88101e-05
cg02535219	NM_014153	ZC3H7A	TSS1500	NA	NA	0.422558	0.142073	-0.66378	2.79661e-07	5.88162e-05
cg12377139	NM_172242	SPAG6	TSS200	chr10:22634000-22634862	Island	0.187654	0.540964	1.88277	2.80517e-07	5.89015e-05
cg06511917	NM_178161	PTF1A	Body	chr10:23480697-23482455	Island	0.217331	0.391727	0.802446	2.81029e-07	5.89146e-05
cg06398251	NM_198244	EIF4G1	5'UTR	chr3:184032166-184033242	S_Shore	0.571819	0.166264	-0.709238	2.8123e-07	5.89251e-05
cg23919111	NA	NA	NA	NA	NA	0.342248	0.0753	-0.779984	2.81009e-07	5.89419e-05
cg20256009	NM_002964	S100A8	5'UTR	NA	NA	0.812653	0.318773	-0.607738	2.82374e-07	5.91018e-05
cg26312951	NM_002462	MX1	TSS200	chr21:42798146-42798884	N_Shore	0.523181	0.191618	-0.633744	2.82682e-07	5.91348e-05
cg05890855	NA	NA	NA	NA	NA	0.644991	0.172736	-0.732188	2.83805e-07	5.93381e-05
cg20727233	NM_133436	ASNS	TSS1500	chr7:97501183-97501919	S_Shore	0.138857	0.0500818	-0.639327	2.85539e-07	5.95106e-05
cg19686152	NM_014547	TMOD3	TSS1500	chr15:52121816-52122452	N_Shore	0.519765	0.248227	-0.522424	2.86113e-07	5.95669e-05
cg17478749	NM_080686	PRRC2A	5'UTR	chr6:31587779-31589024	S_Shore	0.212473	0.0665182	-0.686933	2.8611e-07	5.95979e-05
cg22084563	NM_001002914	KCTD11	TSS200	chr17:7254622-7255808	Island	0.229097	0.0534	-0.766911	2.86814e-07	5.96496e-05
cg01409735	NM_024827	HDAC11	TSS1500	chr3:13520912-13521319	Island	0.112622	0.0501182	-0.554988	2.88812e-07	6.00016e-05
cg03377767	NM_001105569	MSGN1	TSS1500	NA	NA	0.599447	0.297264	-0.504103	2.90752e-07	6.03088e-05
cg16061668	NM_138565	CTTN	Body	chr11:70257279-70257556	N_Shore	0.370635	0.806273	1.17538	2.90628e-07	6.0315e-05
cg07632946	NM_001164326	BRD8	TSS1500	chr5:137514660-137514941	S_Shore	0.395881	0.167727	-0.576319	2.91447e-07	6.04211e-05
cg03036777	NM_018207	TRIM62	TSS1500	chr1:33646613-33647878	S_Shore	0.673897	0.328	-0.513279	2.93487e-07	6.0812e-05
cg26170244	NA	NA	NA	NA	NA	0.532954	0.109627	-0.794303	2.94922e-07	6.10447e-05
cg20473452	NM_005961	MUC6	TSS1500	chr11:1034834-1035146	S_Shore	0.65143	0.301018	-0.537912	2.95838e-07	6.11699e-05
cg08162476	NM_001134382	IQSEC1	Body	NA	NA	0.728858	0.315545	-0.567068	2.96868e-07	6.13182e-05
cg06557644	NM_006092	NOD1	5'UTR	NA	NA	0.46707	0.787745	0.686569	2.96714e-07	6.13188e-05
cg16411857	NM_032206	NLRC5	TSS1500	chr16:57023190-57023768	Island	0.399578	0.123045	-0.692061	2.97595e-07	6.14362e-05
cg15540371	NA	NA	NA	NA	NA	0.110093	0.0370909	-0.663095	2.98072e-07	6.15023e-05
cg22416002	NR_000026	SNORD139	TSS200	chr22:39715473-39715945	N_Shelf	0.829509	0.3998	-0.518028	3.02032e-07	6.22866e-05
cg17087669	NM_002754	MAPK13	Body	chr6:36098039-36098621	S_Shore	0.457248	0.136673	-0.701097	3.02479e-07	6.23461e-05
cg15834037	NM_002221	ITPKB	Body	NA	NA	0.319358	0.112164	-0.648783	3.03035e-07	6.2428e-05
cg10832076	NM_134431	SLCO1A2	3'UTR	NA	NA	0.592393	0.263255	-0.555608	3.04079e-07	6.25774e-05
cg18347153	NR_003551	DPY19L2P4	TSS1500	chr7:89747892-89749036	Island	0.12416	0.310791	1.50314	3.05049e-07	6.27113e-05
cg16486109	NM_004031	IRF7	Body	chr11:614760-616068	N_Shore	0.773835	0.255464	-0.669873	3.06365e-07	6.29489e-05
cg09951637	NA	NA	NA	NA	NA	0.236922	0.109482	-0.5379	3.06978e-07	6.30417e-05
cg08640252	NM_002513	NME3	Body	chr16:1820311-1823954	Island	0.330527	0.0338636	-0.897547	3.07933e-07	6.31717e-05
cg03597243	NM_021184	C6orf47	1stExon	chr6:31628338-31628658	N_Shore	0.0906513	0.0337091	-0.628146	3.09536e-07	6.33682e-05
cg26487948	NM_001031711	ERGIC1	Body	NA	NA	0.0669	0.0290818	-0.565294	3.1098e-07	6.36307e-05
cg12628062	NM_016556	PSMC3IP	Body	chr17:40729444-40729965	N_Shore	0.0727274	0.0306273	-0.578876	3.11976e-07	6.3768e-05
cg06153925	NM_020761	RPTOR	Body	NA	NA	0.560311	0.891236	0.590611	3.12176e-07	6.37758e-05
cg19749916	NA	NA	NA	NA	NA	0.363059	0.771764	1.12572	3.13788e-07	6.40716e-05
cg06923616	NM_019022	TMX3	Body	chr18:66381934-66382575	N_Shore	0.308856	0.1346	-0.564198	3.14524e-07	6.41885e-05
cg14055835	NM_133272	FCAR	TSS1500	NA	NA	0.45329	0.189664	-0.581585	3.14687e-07	6.41885e-05
cg03062944	NA	NA	NA	NA	NA	0.56821	0.115955	-0.79593	3.15841e-07	6.43236e-05
cg11257113	NA	NA	NA	NA	NA	0.192505	0.0778091	-0.595808	3.15698e-07	6.43278e-05
cg18942579	NM_030938	VMP1	Body	NA	NA	0.458217	0.127127	-0.722561	3.16802e-07	6.44525e-05
cg05279738	NA	NA	NA	NA	NA	0.526702	0.206273	-0.608369	3.22669e-07	6.55442e-05
cg20874052	NM_001168618	IFT46	TSS1500	NA	NA	0.439076	0.193709	-0.558826	3.25397e-07	6.59959e-05
cg14851701	NA	NA	NA	NA	NA	0.673658	0.325245	-0.517195	3.25337e-07	6.60179e-05
cg03039243	NA	NA	NA	NA	NA	0.440613	0.220218	-0.500201	3.25847e-07	6.60531e-05
cg06658146	NA	NA	NA	NA	NA	0.0972549	0.0344	-0.64629	3.26736e-07	6.6199e-05
cg14153654	NM_001561	TNFRSF9	TSS200	chr1:8002408-8002699	N_Shore	0.38556	0.169355	-0.560757	3.27035e-07	6.62256e-05
cg04351258	NM_033410	ZNF764	Body	chr16:30569181-30570049	N_Shore	0.101861	0.0421818	-0.585889	3.28687e-07	6.64915e-05
cg05343811	NM_033116	NEK9	Body	chr14:75593293-75594011	N_Shelf	0.430071	0.121373	-0.717784	3.28616e-07	6.65115e-05
cg09234252	NA	NA	NA	NA	NA	0.395786	0.834509	1.10849	3.3063e-07	6.685e-05
cg20672708	NM_014742	TM9SF4	TSS1500	NA	NA	0.793415	0.326436	-0.588568	3.33058e-07	6.72025e-05
cg26346875	NM_006295	VARS	Body	chr6:31763240-31763905	N_Shore	0.103488	0.0419909	-0.594246	3.33811e-07	6.73199e-05
cg13008315	NA	NA	NA	NA	NA	0.170606	0.066	-0.613144	3.3476e-07	6.74075e-05
cg03431111	NR_002561	SNORD30	TSS1500	chr11:62623359-62623877	N_Shore	0.441205	0.217945	-0.506023	3.34953e-07	6.74117e-05
cg20408175	NM_002624	PFDN5	3'UTR	chr12:53693441-53694028	N_Shore	0.547318	0.267509	-0.511236	3.34644e-07	6.74186e-05
cg17971578	NM_032017	STK40	TSS1500	chr1:36851089-36851873	S_Shore	0.473596	0.117127	-0.752685	3.35818e-07	6.74475e-05
cg18411043	NM_006762	LAPTM5	Body	NA	NA	0.468337	0.204773	-0.562766	3.35714e-07	6.74612e-05
cg05005217	NM_152562	CDCA2	5'UTR	chr8:25315286-25317028	S_Shore	0.630341	0.281327	-0.55369	3.36115e-07	6.74726e-05
cg06780202	NM_001146075	RPAP3	5'UTR	chr12:48099317-48099905	N_Shore	0.129195	0.0409545	-0.683001	3.35698e-07	6.74924e-05
cg03969725	NM_181802	UBE2C	5'UTR	chr20:44440946-44441655	S_Shore	0.473668	0.137036	-0.710691	3.43188e-07	6.86819e-05
cg08883146	NA	NA	NA	NA	NA	0.118899	0.0516818	-0.565331	3.44096e-07	6.87935e-05
cg22524061	NM_001142462	OSR2	5'UTR	chr8:99960497-99961438	N_Shore	0.261375	0.816845	2.12518	3.44586e-07	6.88563e-05
cg17340519	NM_152495	CNIH3	Body	chr1:224805408-224805853	Island	0.253535	0.604464	1.38414	3.45164e-07	6.89017e-05
cg05216542	NA	NA	NA	NA	NA	0.710073	0.277155	-0.609681	3.45476e-07	6.8929e-05
cg07015079	NM_144698	ANKRD35	Body	NA	NA	0.267804	0.129845	-0.515148	3.49347e-07	6.96659e-05
cg01378159	NM_013385	CYTH4	Body	NA	NA	0.060208	0.0295545	-0.509126	3.52306e-07	7.01491e-05
cg08844770	NM_001961	EEF2	Body	chr19:3982824-3983190	Island	0.703127	0.346582	-0.507085	3.5375e-07	7.02941e-05
cg03433942	NM_007354	LINC01565	TSS200	NA	NA	0.550238	0.212009	-0.614696	3.55249e-07	7.05204e-05
cg09115713	NM_001142864	PIEZO1	Body	NA	NA	0.888395	0.441818	-0.502678	3.57756e-07	7.09107e-05
cg24398479	NA	NA	NA	NA	NA	0.131365	0.437555	2.33082	3.57677e-07	7.09307e-05
cg10617994	NM_004750	CRLF1	Body	chr19:18716229-18718743	Island	0.114884	0.0543273	-0.527112	3.58325e-07	7.09519e-05
cg18529294	NM_024322	CENPO	Body	chr2:25015879-25016627	S_Shore	0.0472938	0.0222909	-0.528672	3.60252e-07	7.12616e-05
cg02150262	NM_019055	ROBO4	Body	NA	NA	0.648722	0.2602	-0.598904	3.62316e-07	7.15256e-05
cg25510201	NM_017675	CDHR2	5'UTR	NA	NA	0.43555	0.153664	-0.647196	3.64109e-07	7.18074e-05
cg10204320	NR_026850	MTMR9LP	TSS1500	chr1:32705524-32707141	S_Shore	0.205725	0.529655	1.57458	3.67011e-07	7.21622e-05
cg24446586	NM_005523	HOXA11	TSS1500	chr7:27225050-27225629	Island	0.264163	0.575682	1.17927	3.66878e-07	7.21723e-05
cg11996860	NA	NA	NA	NA	NA	0.439737	0.824091	0.874053	3.67752e-07	7.22356e-05
cg12386297	NR_029622	MIR205	TSS1500	NA	NA	0.553922	0.165573	-0.70109	3.6992e-07	7.25525e-05
cg26216876	NM_016045	PRELID3B	Body	chr20:57617430-57618222	N_Shore	0.615935	0.164864	-0.732336	3.69855e-07	7.25761e-05
cg10725390	NM_002398	MEIS1	Body	NA	NA	0.769416	0.371409	-0.517284	3.71228e-07	7.27728e-05
cg12377816	NA	NA	NA	NA	NA	0.529756	0.173727	-0.672062	3.72037e-07	7.28585e-05
cg03345805	NM_001128928	INPP1	TSS200	chr2:191208306-191209000	N_Shore	0.120314	0.0540182	-0.551024	3.75481e-07	7.34232e-05
cg09825327	NM_004619	TRAF5	5'UTR	chr1:211500151-211500636	S_Shelf	0.635241	0.2825	-0.555287	3.77332e-07	7.37116e-05
cg27023597	NR_029493	MIR21	TSS1500	NA	NA	0.696672	0.202982	-0.708641	3.77684e-07	7.37437e-05
cg02694489	NM_000747	CHRNB1	TSS200	chr17:7348274-7348830	Island	0.0742973	0.157318	1.11741	3.77898e-07	7.3749e-05
cg15531369	NR_000020	SNORD33	TSS1500	chr19:49991240-49991518	S_Shore	0.697701	0.330282	-0.526614	3.78593e-07	7.38112e-05
cg19055323	NM_033060	KRTAP4-1	TSS1500	NA	NA	0.705691	0.343855	-0.512741	3.78512e-07	7.3832e-05
cg02010738	NM_001031735	IZUMO4	TSS1500	chr19:2095395-2095727	Island	0.297667	0.128582	-0.568035	3.80471e-07	7.41405e-05
cg13849525	NM_001029861	NANOS2	TSS200	chr19:46417528-46417745	S_Shore	0.29492	0.123436	-0.581459	3.81156e-07	7.42004e-05
cg11431981	NM_006332	IFI30	Body	chr19:18284521-18285023	S_Shore	0.0587743	0.0274273	-0.533346	3.81484e-07	7.42273e-05
cg10288278	NM_173078	SLITRK4	5'UTR	chrX:142721410-142722958	Island	0.222323	0.469909	1.11363	3.81729e-07	7.42382e-05
cg21162528	NM_198827	ADGRD1	Body	NA	NA	0.69525	0.340955	-0.509595	3.82903e-07	7.44297e-05
cg02981078	NM_001009894	C12orf29	TSS1500	chr12:88429105-88429606	N_Shore	0.523659	0.790964	0.510455	3.83355e-07	7.44807e-05
cg08932727	NM_020185	DUSP22	Body	NA	NA	0.635158	0.233391	-0.632546	3.85224e-07	7.4696e-05
cg04287686	NM_002049	GATA1	TSS200	NA	NA	0.386876	0.138791	-0.641252	3.86487e-07	7.49039e-05
cg24275315	NM_006168	NKX6-1	Body	chr4:85417659-85420799	N_Shore	0.246758	0.523755	1.12255	3.87401e-07	7.50069e-05
cg06454380	NA	NA	NA	NA	NA	0.170776	0.0780636	-0.542889	3.8992e-07	7.54575e-05
cg21965980	NM_021910	FXYD3	3'UTR	chr19:35615412-35615665	N_Shore	0.71185	0.353045	-0.504045	3.92409e-07	7.58271e-05
cg03487430	NM_001782	CD72	Body	chr9:35616980-35617324	N_Shore	0.424104	0.677482	0.597441	3.9312e-07	7.58897e-05
cg12018809	NM_020400	LPAR5	5'UTR	NA	NA	0.533681	0.172045	-0.677625	3.94838e-07	7.6184e-05
cg25540816	NM_001025105	CSNK1A1	Body	chr5:148930249-148931244	N_Shore	0.197418	0.0779182	-0.605313	3.95582e-07	7.62525e-05
cg06923861	NM_020693	DSCAML1	Body	chr11:117352691-117352961	S_Shelf	0.70002	0.3268	-0.533156	3.96809e-07	7.64515e-05
cg12634276	NR_024031	DANCR	TSS1500	chr4:53578358-53579238	N_Shore	0.242282	0.0979727	-0.595626	3.99398e-07	7.69126e-05
cg16120196	NA	NA	NA	NA	NA	0.607919	0.259891	-0.572491	3.99897e-07	7.6971e-05
cg20651616	NA	NA	NA	NA	NA	0.137857	0.369464	1.68006	4.04165e-07	7.75643e-05
cg14640244	NM_001001712	LCN10	Body	chr9:139634062-139634281	S_Shelf	0.33363	0.115491	-0.653835	4.04066e-07	7.75832e-05
cg07154254	NM_001114309	ELF3	TSS1500	NA	NA	0.318017	0.111927	-0.648046	4.03888e-07	7.75871e-05
cg05363382	NA	NA	NA	NA	NA	0.832716	0.389609	-0.532122	4.05546e-07	7.77533e-05
cg21649604	NR_000026	SNORD139	TSS1500	chr22:39715473-39715945	N_Shore	0.221169	0.0648091	-0.70697	4.0549e-07	7.77805e-05
cg12952136	NM_001098477	GRSF1	TSS1500	chr4:71704664-71705736	S_Shore	0.136635	0.0443727	-0.675247	4.07217e-07	7.79216e-05
cg26577252	NM_000875	IGF1R	Body	NA	NA	0.239328	0.0628818	-0.737257	4.08685e-07	7.81264e-05
cg21066636	NM_003963	TM4SF5	1stExon	NA	NA	0.614129	0.296745	-0.516803	4.09875e-07	7.82776e-05
cg03265564	NM_005026	PIK3CD	5'UTR	chr1:9749295-9750228	N_Shore	0.575432	0.267227	-0.535606	4.11542e-07	7.85576e-05
cg13720639	NM_015556	SIPA1L1	Body	NA	NA	0.3089	0.721109	1.33444	4.14436e-07	7.88419e-05
cg23813257	NM_001012636	IL32	TSS1500	NA	NA	0.457394	0.120964	-0.735537	4.1612e-07	7.8971e-05
cg16567290	NM_133489	SLC26A10	TSS200	chr12:58013171-58013652	Island	0.0918558	0.231109	1.516	4.1758e-07	7.91714e-05
cg10817916	NM_001915	CYB561	3'UTR	chr17:61511653-61511886	N_Shore	0.520735	0.788973	0.515115	4.18731e-07	7.93514e-05
cg17969271	NM_012300	FBXW11	Body	chr5:171433004-171434082	N_Shelf	0.6846	0.254136	-0.628781	4.19211e-07	7.9404e-05
cg15489301	NM_020299	AKR1B10	Body	NA	NA	0.352873	0.114291	-0.676113	4.19462e-07	7.94133e-05
cg18811550	NA	NA	NA	NA	NA	0.249306	0.548909	1.20175	4.22238e-07	7.98233e-05
cg27280535	NM_004225	MFHAS1	Body	chr8:8748652-8751478	N_Shore	0.614543	0.193709	-0.684792	4.23802e-07	8.00804e-05
cg12598211	NA	NA	NA	NA	NA	0.419134	0.833782	0.989298	4.25025e-07	8.02728e-05
cg06811166	NM_002135	NR4A1	TSS1500	chr12:52444553-52445421	Island	0.0547389	0.0270909	-0.505089	4.26122e-07	8.04414e-05
cg24402372	NA	NA	NA	NA	NA	0.523504	0.825482	0.576841	4.26474e-07	8.04692e-05
cg10835083	NM_004438	EPHA4	Body	NA	NA	0.676008	0.275536	-0.592407	4.27396e-07	8.05656e-05
cg19509393	NM_014621	HOXD4	1stExon	chr2:177016416-177016632	Island	0.094215	0.464491	3.93011	4.27197e-07	8.05669e-05
cg27658026	NM_001129742	CALHM3	TSS200	NA	NA	0.686334	0.313809	-0.542775	4.2785e-07	8.06126e-05
cg13595161	NM_022802	CTBP2	Body	chr10:126712013-126712231	S_Shore	0.70909	0.337055	-0.524666	4.30605e-07	8.10538e-05
cg00533990	NM_006471	MYL12A	Body	NA	NA	0.838068	0.3694	-0.559224	4.33358e-07	8.13381e-05
cg26981309	NM_001040179	MCHR2	5'UTR	chr6:100441406-100442152	Island	0.0726779	0.3632	3.99739	4.34412e-07	8.14969e-05
cg14251777	NM_175571	GIMAP8	TSS1500	NA	NA	0.465224	0.1702	-0.634155	4.35817e-07	8.16436e-05
cg26282283	NM_025250	TTYH3	3'UTR	chr7:2701330-2701744	S_Shelf	0.441258	0.162345	-0.632085	4.36577e-07	8.17469e-05
cg15906260	NR_002588	SNORA4	TSS200	chr3:186500738-186502048	S_Shelf	0.757712	0.2267	-0.70081	4.37395e-07	8.1822e-05
cg08938584	NM_018918	PCDHGA5	Body	chr5:140797162-140797701	Island	0.220579	0.488891	1.2164	4.40644e-07	8.21949e-05
cg10424974	NA	NA	NA	NA	NA	0.474788	0.200182	-0.578377	4.40484e-07	8.2204e-05
cg25717464	NM_001122779	FAM124B	1stExon	NA	NA	0.367669	0.706855	0.922529	4.41022e-07	8.22264e-05
cg18405341	NM_182810	ATF4	3'UTR	chr22:39915622-39917193	S_Shore	0.564623	0.241473	-0.572329	4.41838e-07	8.23003e-05
cg10285420	NM_001350	DAXX	5'UTR	chr6:33290370-33291087	N_Shore	0.340986	0.158536	-0.535065	4.46055e-07	8.29678e-05
cg02544257	NM_145059	FUK	Body	chr16:70507026-70507246	S_Shelf	0.543696	0.137509	-0.747084	4.46848e-07	8.29973e-05
cg22556143	NM_173575	STK32C	Body	NA	NA	0.707005	0.349764	-0.505289	4.48198e-07	8.32086e-05
cg00411595	NM_001145099	SLC2A6	Body	chr9:136340048-136340263	N_Shore	0.442829	0.733764	0.65699	4.50145e-07	8.34124e-05
cg02376282	NM_053005	MOB2	Body	NA	NA	0.719413	0.298836	-0.584611	4.53255e-07	8.38304e-05
cg09106231	NA	NA	NA	NA	NA	0.786885	0.323927	-0.588342	4.53902e-07	8.39106e-05
cg26953232	NM_005104	BRD2	Body	chr6:32939275-32940954	S_Shore	0.249313	0.0716182	-0.712738	4.54664e-07	8.39723e-05
cg00769843	NM_017670	OTUB1	Body	chr11:63753414-63754454	Island	0.117829	0.0315182	-0.73251	4.54577e-07	8.39958e-05
cg15840079	NM_178031	TMEM132A	TSS1500	chr11:60691785-60692532	N_Shore	0.186368	0.0639364	-0.656935	4.56835e-07	8.42545e-05
cg16986578	NM_001114309	ELF3	TSS200	NA	NA	0.555963	0.247727	-0.554418	4.6118e-07	8.49361e-05
cg21062760	NM_014383	ZBTB32	Body	chr19:36207084-36209691	N_Shore	0.730527	0.301536	-0.587235	4.63085e-07	8.5167e-05
cg23896972	NM_032790	ORAI1	Body	NA	NA	0.353412	0.599109	0.695217	4.64714e-07	8.53868e-05
cg13442969	NM_006482	DYRK2	Body	chr12:68042166-68043876	S_Shore	0.248243	0.0669	-0.730506	4.64535e-07	8.53937e-05
cg25382573	NM_001037671	C12orf74	5'UTR	NA	NA	0.906018	0.332873	-0.632598	4.65011e-07	8.54013e-05
cg26276120	NM_000365	TPI1	Body	chr12:6976392-6977393	S_Shore	0.184636	0.0629818	-0.658887	4.66588e-07	8.55709e-05
cg04138881	NM_001010878	C16orf91	Body	chr16:1478221-1478812	N_Shore	0.58645	0.253609	-0.567552	4.66381e-07	8.55729e-05
cg15465439	NM_138565	CTTN	Body	chr11:70257279-70257556	N_Shore	0.172106	0.508773	1.95616	4.66319e-07	8.56015e-05
cg27031754	NA	NA	NA	NA	NA	0.645713	0.2345	-0.636836	4.67013e-07	8.56088e-05
cg00808555	NM_001143968	ARL5C	TSS1500	chr17:37321482-37322099	S_Shore	0.296648	0.530182	0.787243	4.6925e-07	8.58986e-05
cg27001715	NA	NA	NA	NA	NA	0.412519	0.138118	-0.665183	4.76948e-07	8.71452e-05
cg11743795	NM_007159	SLMAP	TSS200	chr3:57741925-57742990	Island	0.0853354	0.0348	-0.592197	4.76899e-07	8.71769e-05
cg21514164	NA	NA	NA	NA	NA	0.437381	0.795236	0.818176	4.77419e-07	8.71907e-05
cg18861762	NM_001001891	ANO7	TSS200	NA	NA	0.645219	0.289391	-0.551485	4.79565e-07	8.75418e-05
cg18158670	NM_000875	IGF1R	Body	chr15:99434565-99434913	N_Shore	0.824242	0.378491	-0.540802	4.80648e-07	8.76989e-05
cg13434842	NM_002052	GATA4	Body	chr8:11565217-11567212	S_Shore	0.266589	0.562036	1.10825	4.82375e-07	8.78507e-05
cg10745272	NM_001122681	SH3BP2	5'UTR	chr4:2819499-2820429	Island	0.111158	0.0541455	-0.512898	4.83958e-07	8.80165e-05
cg01959730	NA	NA	NA	NA	NA	0.13368	0.592009	3.42857	4.90555e-07	8.90512e-05
cg08904363	NM_001122838	NAPEPLD	TSS1500	chr7:102789395-102790120	Island	0.138808	0.0544455	-0.607764	4.91713e-07	8.90556e-05
cg05343021	NM_153464	ILF3	5'UTR	NA	NA	0.431047	0.172927	-0.59882	4.91673e-07	8.90895e-05
cg17721879	NA	NA	NA	NA	NA	0.169402	0.387218	1.2858	4.94286e-07	8.9398e-05
cg10132208	NM_182572	ZSCAN1	5'UTR	chr19:58545115-58545897	Island	0.141931	0.442118	2.11502	4.96e-07	8.95841e-05
cg05310990	NM_003429	ZNF85	TSS200	NA	NA	0.140673	0.4524	2.21598	4.9985e-07	9.01552e-05
cg20688651	NR_026825	RPSAP52	TSS200	chr12:66217627-66220181	S_Shore	0.510003	0.233818	-0.541535	5.03166e-07	9.07114e-05
cg03427191	NM_001142291	MGRN1	Body	chr16:4698219-4698949	N_Shore	0.36717	0.598445	0.629887	5.03707e-07	9.07256e-05
cg14859724	NA	NA	NA	NA	NA	0.83477	0.386864	-0.536563	5.03501e-07	9.07302e-05
cg18988498	NM_001127612	PAX6	Body	chr11:31825743-31826967	N_Shore	0.246119	0.619745	1.51807	5.05442e-07	9.09132e-05
cg03671276	NM_014815	MED24	Body	NA	NA	0.382968	0.143564	-0.625129	5.06459e-07	9.10543e-05
cg05042743	NM_016499	TMEM216	TSS200	chr11:61159836-61160285	N_Shore	0.152946	0.0244364	-0.840229	5.08007e-07	9.12074e-05
cg22545168	NM_002287	LAIR1	3'UTR	NA	NA	0.674414	0.260618	-0.613564	5.11779e-07	9.18006e-05
cg20790540	NM_138296	PTCRA	Body	NA	NA	0.51831	0.836464	0.61383	5.1171e-07	9.18301e-05
cg26562691	NM_002738	PRKCB	Body	chr16:23846941-23848102	S_Shelf	0.613358	0.165018	-0.73096	5.13764e-07	9.20726e-05
cg00926215	NM_153038	CCDC140	TSS1500	chr2:223162946-223163912	N_Shore	0.107749	0.420536	2.90294	5.14604e-07	9.21811e-05
cg05642379	NA	NA	NA	NA	NA	0.106072	0.0259545	-0.755311	5.16535e-07	9.24005e-05
cg05975710	NM_014786	ARHGEF17	3'UTR	NA	NA	0.656427	0.307945	-0.530877	5.23584e-07	9.35761e-05
cg02419321	NM_002205	ITGA5	Body	chr12:54811981-54812202	N_Shore	0.351279	0.6907	0.966245	5.24212e-07	9.36457e-05
cg17306747	NM_001044	SLC6A3	TSS1500	chr5:1444678-1446648	Island	0.216865	0.495055	1.28278	5.25268e-07	9.37492e-05
cg00420348	NM_173584	CRACR2B	Body	chr11:829284-833558	Island	0.104361	0.0402364	-0.61445	5.26118e-07	9.38156e-05
cg09263516	NA	NA	NA	NA	NA	0.247543	0.552691	1.2327	5.30296e-07	9.44319e-05
cg15899743	NA	NA	NA	NA	NA	0.581835	0.188245	-0.676463	5.31011e-07	9.44735e-05
cg06211872	NM_005996	TBX3	TSS1500	chr12:115124729-115125152	N_Shore	0.243173	0.609691	1.50723	5.31756e-07	9.45204e-05
cg09043456	NM_006340	BAIAP2	Body	chr17:79026043-79026355	N_Shore	0.646964	0.319164	-0.506675	5.34201e-07	9.48692e-05
cg21813376	NM_032880	IGSF21	Body	NA	NA	0.262924	0.116645	-0.556353	5.34851e-07	9.49416e-05
cg02778609	NM_019116	UBFD1	TSS1500	chr16:23568398-23569488	N_Shore	0.424368	0.126291	-0.702402	5.42017e-07	9.60834e-05
cg16235962	NM_001716	CXCR5	TSS200	NA	NA	0.608229	0.234782	-0.613991	5.43046e-07	9.61789e-05
cg23368715	NM_001733	C1R	TSS1500	NA	NA	0.515265	0.143455	-0.721591	5.43835e-07	9.62752e-05
cg05603527	NM_012476	VAX2	Body	chr2:71131200-71132256	Island	0.135733	0.470327	2.4651	5.44784e-07	9.63998e-05
cg04549076	NM_002728	PRG2	5'UTR	NA	NA	0.69677	0.310527	-0.554333	5.47486e-07	9.67907e-05
cg12121318	NM_001004056	GRK4	TSS1500	chr4:2964459-2966014	N_Shore	0.114392	0.0495273	-0.567039	5.57302e-07	9.81724e-05
cg04243368	NA	NA	NA	NA	NA	0.198719	0.0595545	-0.700308	5.64439e-07	9.91628e-05
cg11938367	NM_032263	IQCG	Body	NA	NA	0.716758	0.335145	-0.532414	5.66093e-07	9.94088e-05
cg01245656	NM_133436	ASNS	TSS1500	chr7:97501183-97501919	Island	0.0860858	0.0405273	-0.529223	5.68381e-07	9.96769e-05
cg11951169	NM_018489	ASH1L	Body	NA	NA	0.642906	0.321082	-0.500578	5.71036e-07	0.000100053
cg20637609	NA	NA	NA	NA	NA	0.239044	0.561436	1.34867	5.72192e-07	0.000100211
cg01978534	NM_001640	APEH	TSS1500	chr3:49710968-49712279	Island	0.186746	0.0479818	-0.743064	5.74057e-07	0.000100403
cg19352830	NM_012154	AGO2	Body	NA	NA	0.765425	0.281055	-0.632812	5.73886e-07	0.000100418
cg04232972	NA	NA	NA	NA	NA	0.224539	0.0676545	-0.698696	5.77197e-07	0.000100863
cg00957901	NM_001112719	LIMCH1	TSS200	NA	NA	0.57565	0.189982	-0.66997	5.79124e-07	0.000101064
cg06391932	NA	NA	NA	NA	NA	0.291251	0.580164	0.991969	5.80356e-07	0.000101234
cg12197142	NM_004259	RECQL5	Body	chr17:73627542-73627824	S_Shore	0.262924	0.105582	-0.598432	5.84745e-07	0.000101864
cg06493154	NM_001008739	C6orf226	TSS1500	chr6:42858169-42858960	S_Shore	0.421273	0.118227	-0.719357	5.85884e-07	0.000102017
cg08097614	NM_015649	IRF2BP1	1stExon	chr19:46387327-46389578	Island	0.107743	0.0275727	-0.744089	5.8808e-07	0.000102309
cg17896808	NM_001033028	CYFIP1	Body	NA	NA	0.325684	0.695164	1.13447	5.89646e-07	0.000102536
cg08651538	NM_001142482	NREP	Body	NA	NA	0.313129	0.763036	1.43681	5.90854e-07	0.000102655
cg02067946	NA	NA	NA	NA	NA	0.557423	0.269182	-0.517096	5.93583e-07	0.000102993
cg25043378	NM_000037	ANK1	Body	NA	NA	0.563136	0.256664	-0.544225	5.95121e-07	0.000103123
cg02085805	NM_006621	AHCYL1	TSS200	chr1:110527248-110528026	N_Shore	0.0639487	0.0299364	-0.531869	5.94967e-07	0.000103187
cg07350501	NR_027011	YBX3P1	Body	chr16:31580559-31581023	N_Shore	0.145039	0.514136	2.54482	5.99029e-07	0.000103663
cg13620770	NM_004322	BAD	1stExon	chr11:64052607-64053652	N_Shore	0.144563	0.0508545	-0.648218	5.9991e-07	0.000103724
cg26083458	NM_172208	TAPBP	Body	chr6:33281112-33281827	N_Shore	0.327024	0.105891	-0.676198	6.01398e-07	0.00010389
cg03222834	NM_001145204	SHISA9	Body	NA	NA	0.582194	0.226255	-0.611376	6.05569e-07	0.000104472
cg09123760	NM_138929	DIABLO	TSS200	chr12:122710054-122711371	S_Shore	0.353951	0.705009	0.991825	6.07332e-07	0.000104592
cg19730691	NM_152380	TBX15	5'UTR	chr1:119526782-119527192	N_Shore	0.420717	0.724773	0.722709	6.07078e-07	0.000104595
cg05997414	NM_006037	HDAC4	Body	chr2:240153476-240153792	N_Shore	0.279515	0.621173	1.22232	6.10924e-07	0.000104935
cg06218338	NA	NA	NA	NA	NA	0.214296	0.452836	1.11313	6.13964e-07	0.000105365
cg15676707	NA	NA	NA	NA	NA	0.512442	0.803391	0.567768	6.16252e-07	0.000105711
cg25216696	NM_002052	GATA4	5'UTR	chr8:11565217-11567212	Island	0.0996504	0.383464	2.84809	6.1866e-07	0.000106032
cg11789185	NM_021944	C14orf93	TSS1500	chr14:23479310-23479532	S_Shore	0.209949	0.0752364	-0.641644	6.19637e-07	0.000106107
cg04931256	NA	NA	NA	NA	NA	0.11732	0.452955	2.86084	6.2134e-07	0.000106352
cg03013422	NM_023928	AACS	Body	chr12:125549672-125550311	S_Shore	0.083269	0.0368818	-0.557076	6.2238e-07	0.000106437
cg17389988	NM_024728	SUGCT	Body	NA	NA	0.149647	0.441155	1.94797	6.22893e-07	0.000106478
cg04641860	NM_001098206	HNRNPF	5'UTR	chr10:43891546-43892917	Island	0.504658	0.162182	-0.67863	6.23709e-07	0.000106525
cg23214464	NM_052853	ADCK2	1stExon	chr7:140372743-140373443	S_Shore	0.202671	0.0698455	-0.655375	6.23664e-07	0.000106564
cg11201654	NM_018950	HLA-F	TSS1500	chr6:29691106-29692093	N_Shore	0.257307	0.0815273	-0.683152	6.24329e-07	0.000106585
cg05684266	NA	NA	NA	NA	NA	0.711322	0.3024	-0.574876	6.25233e-07	0.000106693
cg01604946	NM_024577	SH3TC2	Body	NA	NA	0.686788	0.2533	-0.631181	6.25945e-07	0.000106768
cg19104032	NA	NA	NA	NA	NA	0.585	0.203245	-0.652572	6.27211e-07	0.000106937
cg06820975	NM_007246	KLHL2	Body	chr4:166128385-166129255	S_Shore	0.378246	0.124145	-0.671786	6.28134e-07	0.000107002
cg00032609	NM_006886	ATP5E	Body	chr20:57607045-57607782	N_Shore	0.381711	0.128155	-0.664263	6.29703e-07	0.000107222
cg26681770	NM_199170	PMEPA1	5'UTR	chr20:56247249-56247651	Island	0.363055	0.785936	1.16479	6.31029e-07	0.000107402
cg23581793	NR_001459	SNHG10	Body	chr14:96000676-96001865	N_Shore	0.610792	0.267473	-0.562089	6.33547e-07	0.000107411
cg15931949	NA	NA	NA	NA	NA	0.2071	0.601682	1.90527	6.33042e-07	0.000107418
cg20674725	NM_015175	NBEAL2	TSS1500	chr3:47020855-47021399	Island	0.070854	0.0249636	-0.647675	6.31408e-07	0.00010742
cg07246273	NA	NA	NA	NA	NA	0.169638	0.4542	1.67747	6.35585e-07	0.00010771
cg14544180	NM_001145305	IQCN	5'UTR	NA	NA	0.633727	0.290736	-0.541227	6.38306e-07	0.000108078
cg22638505	NR_027130	ZNF738	Body	NA	NA	0.119934	0.3931	2.27765	6.43514e-07	0.000108866
cg16931068	NM_139074	DEFB127	3'UTR	NA	NA	0.256102	0.0991455	-0.612867	6.45186e-07	0.000109055
cg16966139	NR_029429	PGCP1	TSS1500	NA	NA	0.574852	0.1935	-0.663392	6.47095e-07	0.00010933
cg26853415	NM_000625	NOS2	1stExon	NA	NA	0.780437	0.352218	-0.548691	6.47385e-07	0.000109332
cg17479716	NA	NA	NA	NA	NA	0.730339	0.324018	-0.556345	6.52797e-07	0.000110152
cg14519515	NM_001619	GRK2	TSS1500	chr11:67033675-67034660	N_Shore	0.564093	0.145873	-0.741403	6.54576e-07	0.000110404
cg04264726	NM_001640	APEH	TSS1500	chr3:49710968-49712279	N_Shore	0.30489	0.130482	-0.572037	6.56358e-07	0.00011061
cg00563824	NA	NA	NA	NA	NA	0.269769	0.661064	1.45048	6.60549e-07	0.000111078
cg01005211	NA	NA	NA	NA	NA	0.153951	0.0490091	-0.681659	6.60349e-07	0.000111092
cg05308792	NM_014714	IFT140	Body	chr16:1574515-1574986	S_Shelf	0.837224	0.392091	-0.531677	6.61168e-07	0.000111134
cg01456243	NM_001039675	UNC45A	Body	chr15:91478117-91478983	Island	0.166007	0.0613	-0.630739	6.63132e-07	0.000111417
cg18274559	NM_006295	VARS	Body	chr6:31763240-31763905	N_Shore	0.042677	0.0194818	-0.543505	6.66122e-07	0.000111871
cg08217285	NM_014030	GIT1	TSS1500	chr17:27918161-27918398	N_Shore	0.396071	0.116827	-0.705034	6.66593e-07	0.000111902
cg15844711	NM_152716	PATL1	Body	chr11:59436201-59437232	N_Shore	0.672318	0.328782	-0.510973	6.68775e-07	0.000112173
cg07071449	NM_005855	RAMP1	Body	NA	NA	0.633037	0.228936	-0.638352	6.69632e-07	0.000112269
cg00167670	NA	NA	NA	NA	NA	0.651354	0.315636	-0.515415	6.7043e-07	0.000112354
cg17163729	NA	NA	NA	NA	NA	0.522358	0.1855	-0.644879	6.71064e-07	0.000112413
cg00584422	NM_033266	ERN2	1stExon	chr16:23724270-23724775	Island	0.301417	0.5366	0.780259	6.73667e-07	0.000112801
cg17855595	NM_001136036	ZNF692	Body	NA	NA	0.413112	0.704655	0.705725	6.77204e-07	0.000113344
cg19516340	NM_001165931	RRM2	Body	chr2:10262173-10263481	S_Shore	0.131605	0.0578273	-0.560601	6.7829e-07	0.00011343
cg16688112	NM_016209	TRAPPC2L	TSS1500	chr16:88922671-88923976	Island	0.277966	0.0950182	-0.658167	6.79982e-07	0.000113567
cg06008356	NM_001005407	CACNA1H	Body	chr16:1235938-1237262	N_Shelf	0.635088	0.300655	-0.526594	6.79715e-07	0.000113571
cg15802396	NM_001128827	DLG4	Body	chr17:7108304-7108654	Island	0.0800363	0.0240909	-0.699	6.80379e-07	0.000113585
cg08130912	NM_182910	SYNE2	Body	NA	NA	0.389313	0.687836	0.766794	6.83594e-07	0.00011388
cg24813736	NA	NA	NA	NA	NA	0.172437	0.576755	2.34472	6.84919e-07	0.000114052
cg18728264	NM_001716	CXCR5	3'UTR	NA	NA	0.382959	0.163627	-0.572729	6.85898e-07	0.00011407
cg26754664	NM_019055	ROBO4	3'UTR	NA	NA	0.693741	0.270091	-0.610675	6.85715e-07	0.000114088
cg18506744	NM_002085	GPX4	TSS1500	chr19:1103722-1105758	N_Shore	0.458406	0.0858364	-0.81275	6.86743e-07	0.000114162
cg20329220	NR_026998	LOC91450	Body	NA	NA	0.464616	0.190464	-0.590062	6.88364e-07	0.000114384
cg11469540	NM_145109	MAP2K3	Body	chr17:21187552-21188443	S_Shore	0.285837	0.0742364	-0.740284	6.91075e-07	0.000114737
cg06095777	NM_007053	CD160	5'UTR	chr1:145713966-145714203	Island	0.134785	0.0544545	-0.595989	6.92307e-07	0.000114844
cg20981089	NA	NA	NA	NA	NA	0.206517	0.451227	1.18494	6.9265e-07	0.000114853
cg03393602	NM_138340	ABHD3	TSS1500	chr18:19284165-19285052	S_Shore	0.347804	0.1282	-0.631401	6.95678e-07	0.000115112
cg26886544	NM_173806	PDZD9	TSS200	NA	NA	0.0318681	0.0157636	-0.505348	6.95395e-07	0.000115113
cg11213898	NM_000859	HMGCR	5'UTR	chr5:74632476-74633673	S_Shore	0.055577	0.0257182	-0.537251	6.97161e-07	0.000115308
cg21876925	NM_003326	TNFSF4	Body	NA	NA	0.408053	0.758418	0.858626	6.98553e-07	0.000115441
cg11768167	NM_018950	HLA-F	TSS1500	chr6:29691106-29692093	N_Shore	0.180227	0.0525727	-0.708296	7.01148e-07	0.000115822
cg26164712	NM_001716	CXCR5	1stExon	NA	NA	0.669499	0.290082	-0.566718	7.02104e-07	0.000115931
cg23370306	NA	NA	NA	NA	NA	0.0280832	0.0117455	-0.581762	7.02486e-07	0.000115945
cg15134506	NM_152586	USP54	TSS1500	NA	NA	0.620757	0.214164	-0.654996	7.04016e-07	0.000116149
cg24536146	NA	NA	NA	NA	NA	0.447335	0.145155	-0.675512	7.04435e-07	0.000116169
cg14523734	NA	NA	NA	NA	NA	0.393751	0.671482	0.705345	7.05409e-07	0.000116183
cg13904286	NM_213566	DFFA	Body	chr1:10532177-10532800	N_Shore	0.360711	0.120218	-0.666718	7.0828e-07	0.000116558
cg07085895	NM_024680	E2F8	1stExon	chr11:19261912-19262156	Island	0.0963522	0.0458727	-0.523906	7.13183e-07	0.000116827
cg05336395	NM_002590	PCDH8	1stExon	chr13:53419897-53422872	Island	0.313965	0.617491	0.966748	7.13592e-07	0.000116845
cg02122920	NM_138296	PTCRA	TSS200	chr6:42879279-42879623	S_Shelf	0.374214	0.789936	1.11092	7.12819e-07	0.000116865
cg23188547	NM_001254	CDC6	TSS1500	chr17:38443815-38444152	N_Shore	0.0434354	0.0206545	-0.524477	7.15055e-07	0.000117036
cg09336589	NM_001128827	DLG4	Body	chr17:7108304-7108654	N_Shore	0.602112	0.267645	-0.555489	7.15658e-07	0.000117086
cg15416179	NM_145109	MAP2K3	Body	chr17:21187552-21188443	S_Shore	0.440585	0.0664909	-0.849085	7.20515e-07	0.000117586
cg08373904	NM_053005	MOB2	Body	NA	NA	0.708697	0.274727	-0.612349	7.2521e-07	0.00011796
cg00881010	NM_005598	NHLH1	TSS200	chr1:160340604-160340843	N_Shelf	0.522496	0.231718	-0.556516	7.24867e-07	0.000118002
cg17842066	NM_005768	LPCAT3	Body	chr12:7125534-7126356	N_Shore	0.0713177	0.0328909	-0.538811	7.24595e-07	0.000118007
cg18801806	NM_198489	CCDC84	Body	chr11:118868641-118869204	S_Shore	0.290985	0.125473	-0.5688	7.23997e-07	0.000118007
cg07152216	NA	NA	NA	NA	NA	0.100135	0.578673	4.7789	7.26212e-07	0.000118074
cg09911316	NA	NA	NA	NA	NA	0.787005	0.339755	-0.568294	7.27557e-07	0.000118244
cg18890561	NA	NA	NA	NA	NA	0.0934319	0.0271364	-0.70956	7.28389e-07	0.00011833
cg05933789	NA	NA	NA	NA	NA	0.883423	0.438191	-0.503985	7.30537e-07	0.000118581
cg23202253	NM_002223	ITPR2	Body	NA	NA	0.687511	0.275845	-0.598776	7.32166e-07	0.000118796
cg21236500	NM_021138	TRAF2	TSS1500	chr9:139780406-139781527	N_Shore	0.705225	0.352436	-0.50025	7.36945e-07	0.000119325
cg01179256	NM_018413	CHST11	Body	NA	NA	0.352189	0.656564	0.864235	7.4182e-07	0.000119966
cg04654489	NA	NA	NA	NA	NA	0.144177	0.0584636	-0.594501	7.45499e-07	0.000120512
cg20948486	NM_001080471	PEAR1	TSS1500	chr1:156863415-156863711	N_Shore	0.202888	0.519627	1.56116	7.46496e-07	0.000120573
cg10798766	NM_018641	CHST12	TSS1500	chr7:2442792-2444011	Island	0.167127	0.0713	-0.573379	7.47191e-07	0.000120636
cg06432200	NM_006162	NFATC1	Body	chr18:77233326-77236398	S_Shore	0.444437	0.6979	0.570301	7.49987e-07	0.000120988
cg10481072	NM_001145306	CDK6	Body	chr7:92462201-92466387	N_Shelf	0.499053	0.832209	0.667576	7.50543e-07	0.000121028
cg02634141	NR_030234	MIR507	TSS1500	NA	NA	0.626004	0.212955	-0.659819	7.55909e-07	0.000121793
cg25610428	NM_178353	LCE1E	TSS1500	NA	NA	0.564689	0.267	-0.527174	7.59398e-07	0.000122205
cg07615493	NM_133475	ANKRD24	Body	chr19:4217518-4218068	N_Shelf	0.586788	0.172991	-0.70519	7.60415e-07	0.000122318
cg26269881	NM_003670	BHLHE40	Body	chr3:5024760-5024967	N_Shore	0.655636	0.276409	-0.578411	7.62401e-07	0.000122437
cg26492368	NM_172242	SPAG6	Body	chr10:22634000-22634862	Island	0.21732	0.598709	1.75496	7.64718e-07	0.000122709
cg17164016	NA	NA	NA	NA	NA	0.627823	0.266882	-0.574909	7.69742e-07	0.000123364
cg27387615	NA	NA	NA	NA	NA	0.381004	0.628482	0.649539	7.7041e-07	0.000123421
cg06457408	NM_004309	ARHGDIA	5'UTR	chr17:79828636-79830135	N_Shore	0.595066	0.294264	-0.505494	7.7173e-07	0.000123531
cg17903590	NA	NA	NA	NA	NA	0.616106	0.176927	-0.71283	7.75757e-07	0.000124024
cg07427475	NM_201382	PLEC	Body	chr8:145008908-145009407	N_Shore	0.527122	0.1323	-0.749015	7.77585e-07	0.000124266
cg14427009	NM_001040429	PCDH17	1stExon	chr13:58206526-58208930	Island	0.266137	0.580991	1.18305	7.79128e-07	0.000124462
cg19135406	NM_014247	RAPGEF2	Body	NA	NA	0.488297	0.226682	-0.535771	7.82203e-07	0.000124801
cg14148265	NM_001136025	PLS3	5'UTR	NA	NA	0.486947	0.239909	-0.50732	7.83059e-07	0.000124886
cg18048370	NA	NA	NA	NA	NA	0.536612	0.245473	-0.542551	7.86228e-07	0.000125036
cg23975251	NM_004565	PEX14	Body	NA	NA	0.453581	0.742791	0.637616	7.85059e-07	0.000125053
cg03111039	NM_000043	FAS	Body	chr10:90750293-90751108	S_Shore	0.120072	0.0506	-0.578585	7.85599e-07	0.000125088
cg05376228	NM_001100122	SBNO2	Body	chr19:1122475-1123287	Island	0.635765	0.229036	-0.639747	7.8772e-07	0.000125122
cg00981877	NM_006045	ATP9A	Body	NA	NA	0.228811	0.0582091	-0.745601	7.87683e-07	0.000125166
cg03117611	NA	NA	NA	NA	NA	0.483092	0.239782	-0.503652	7.90263e-07	0.000125373
cg12997720	NM_005523	HOXA11	TSS1500	chr7:27225050-27225629	Island	0.170484	0.525027	2.07963	7.90705e-07	0.000125393
cg04526480	NA	NA	NA	NA	NA	0.63015	0.253018	-0.598479	7.90018e-07	0.000125436
cg04293085	NM_000678	ADRA1D	Body	chr20:4202148-4202765	Island	0.0722186	0.4845	5.7088	7.97759e-07	0.00012646
cg04614923	NM_001037671	C12orf74	TSS1500	NA	NA	0.400312	0.112618	-0.718674	7.98942e-07	0.000126597
cg19704755	NA	NA	NA	NA	NA	0.511156	0.813518	0.591527	8.01004e-07	0.000126821
cg04931539	NM_004518	KCNQ2	Body	chr20:62079615-62079912	N_Shore	0.623948	0.201864	-0.676474	8.02676e-07	0.000127035
cg14053764	NM_017943	FBXO34	5'UTR	chr14:55765300-55765575	N_Shelf	0.500039	0.812355	0.624583	8.03292e-07	0.000127081
cg21762788	NA	NA	NA	NA	NA	0.167686	0.620664	2.70135	8.04427e-07	0.000127209
cg02683873	NM_144725	TTC23L	TSS1500	chr5:34838921-34839624	Island	0.120419	0.0325091	-0.730035	8.06765e-07	0.000127528
cg18833928	NA	NA	NA	NA	NA	0.407873	0.7256	0.778987	8.09454e-07	0.000127901
cg13014333	NM_006295	VARS	Body	chr6:31763240-31763905	N_Shore	0.152691	0.0588455	-0.614611	8.10526e-07	0.000127916
cg23325963	NA	NA	NA	NA	NA	0.145438	0.557164	2.83093	8.11542e-07	0.000128025
cg27313642	NR_029669	MIR124-2	TSS200	chr8:65290108-65290946	S_Shore	0.149225	0.489118	2.27773	8.13571e-07	0.000128088
cg11051158	NM_003203	GCFC2	TSS200	chr2:75937657-75938139	S_Shore	0.237219	0.0777182	-0.672379	8.18508e-07	0.00012871
cg19598514	NM_001012302	ANO9	TSS200	NA	NA	0.264319	0.0696545	-0.736475	8.23064e-07	0.000129323
cg02345399	NA	NA	NA	NA	NA	0.644518	0.253691	-0.606386	8.31818e-07	0.000130386
cg02232839	NA	NA	NA	NA	NA	0.173099	0.552282	2.19055	8.34092e-07	0.00013043
cg05205842	NM_016531	KLF3	5'UTR	NA	NA	0.866965	0.419227	-0.516442	8.31794e-07	0.000130434
cg12057242	NM_016207	CPSF3	Body	NA	NA	0.766741	0.340027	-0.556529	8.32547e-07	0.000130448
cg13375828	NM_175081	P2RX5	Body	chr17:3599052-3599551	N_Shore	0.377167	0.1553	-0.588246	8.38774e-07	0.000130953
cg09327847	NM_002738	PRKCB	Body	NA	NA	0.584569	0.205045	-0.649237	8.39694e-07	0.000131045
cg12744820	NM_175747	OLIG3	1stExon	chr6:137814355-137815202	Island	0.144207	0.584973	3.05648	8.46626e-07	0.000131812
cg01802121	NA	NA	NA	NA	NA	0.724935	0.347745	-0.520308	8.46339e-07	0.00013182
cg15993458	NM_000593	TAP1	Body	chr6:32820849-32822370	N_Shore	0.0346451	0.0153	-0.55838	8.49344e-07	0.000132183
cg02088785	NM_001032296	STK24	Body	NA	NA	0.670649	0.164118	-0.755284	8.50488e-07	0.000132204
cg08541772	NM_152485	C1orf74	TSS1500	chr1:209957721-209958167	Island	0.0834009	0.0363636	-0.56399	8.49845e-07	0.000132208
cg07762181	NA	NA	NA	NA	NA	0.466162	0.7365	0.579923	8.53965e-07	0.000132692
cg23693487	NM_004156	PPP2CB	TSS1500	chr8:30669450-30670475	S_Shore	0.794642	0.324118	-0.592121	8.55619e-07	0.000132896
cg14238959	NA	NA	NA	NA	NA	0.0472991	0.355373	6.51331	8.56769e-07	0.000132969
cg14568830	NA	NA	NA	NA	NA	0.0843788	0.381282	3.51869	8.5727e-07	0.000132995
cg16140952	NM_001143983	CHRDL1	TSS200	chrX:110038946-110039370	S_Shore	0.190279	0.415036	1.1812	8.58574e-07	0.000133092
cg16512755	NM_001160042	IQCC	TSS1500	chr1:32670569-32671885	Island	0.133853	0.0552909	-0.586928	8.59298e-07	0.000133152
cg12484072	NM_003246	THBS1	TSS1500	chr15:39872527-39873567	N_Shore	0.0678327	0.0307455	-0.546746	8.6065e-07	0.000133308
cg19396666	NA	NA	NA	NA	NA	0.699651	0.291673	-0.583117	8.62792e-07	0.000133535
cg24863152	NM_001029884	PLEKHG1	Body	NA	NA	0.493673	0.194527	-0.605959	8.66055e-07	0.000133934
cg14106710	NA	NA	NA	NA	NA	0.611268	0.255564	-0.581912	8.68451e-07	0.000134199
cg22635491	NM_005996	TBX3	Body	chr12:115109503-115110061	Island	0.186346	0.629264	2.37686	8.70977e-07	0.000134484
cg06532880	NM_013237	PRELID1	Body	chr5:176730031-176731130	S_Shore	0.237552	0.0503364	-0.788104	8.73607e-07	0.000134784
cg17576316	NA	NA	NA	NA	NA	0.0947257	0.0435273	-0.540491	8.79719e-07	0.00013546
cg00017489	NM_001039350	DPP6	TSS1500	chr7:153583317-153585666	Island	0.376787	0.664345	0.763187	8.80067e-07	0.000135461
cg00091483	NM_002567	PEBP1	Body	chr12:118573730-118574731	S_Shore	0.0932062	0.0321545	-0.655017	8.81653e-07	0.000135599
cg19134568	NM_004575	POU4F2	Body	chr4:147559205-147561901	Island	0.25874	0.518718	1.00479	8.83272e-07	0.000135741
cg00577202	NM_001007792	NTRK1	TSS1500	chr1:156783523-156784037	S_Shore	0.35121	0.155064	-0.558487	8.84024e-07	0.000135751
cg20745381	NA	NA	NA	NA	NA	0.330558	0.122945	-0.628067	8.83993e-07	0.000135799
cg05711235	NA	NA	NA	NA	NA	0.344701	0.641891	0.862168	8.86204e-07	0.00013582
cg13981001	NM_000976	RPL12	Body	chr9:130213143-130214335	N_Shore	0.666502	0.313445	-0.529715	8.85718e-07	0.000135851
cg15953461	NA	NA	NA	NA	NA	0.613112	0.292491	-0.522941	8.92568e-07	0.000136742
cg06294803	NM_198244	EIF4G1	5'UTR	chr3:184032166-184033242	S_Shore	0.260275	0.0584545	-0.775413	8.94182e-07	0.000136936
cg19581424	NM_019063	EML4	TSS200	chr2:42396301-42396933	Island	0.119443	0.0532182	-0.554448	8.95638e-07	0.000137105
cg20215212	NM_000386	BLMH	Body	chr17:28618370-28619273	N_Shore	0.179659	0.0606636	-0.662341	8.99168e-07	0.000137378
cg20897136	NM_019058	DDIT4	Body	chr10:74033167-74034698	Island	0.219854	0.109027	-0.504092	9.06779e-07	0.000138272
cg12072803	NM_015015	KDM4B	TSS1500	chr19:4968557-4969417	Island	0.106018	0.0517	-0.512346	9.0796e-07	0.000138398
cg00491064	NM_001111018	NAV2	Body	NA	NA	0.624055	0.274027	-0.560892	9.09092e-07	0.000138463
cg21407196	NM_006369	LRRC41	Body	NA	NA	0.352819	0.6566	0.861013	9.09686e-07	0.0001385
cg07775292	NM_031937	TBC1D10A	Body	chr22:30722572-30723218	N_Shelf	0.140473	0.318691	1.26871	9.11687e-07	0.000138751
cg05459517	NM_014943	ZHX2	5'UTR	chr8:123792369-123794942	S_Shore	0.735005	0.282945	-0.615043	9.19612e-07	0.00013974
cg17403974	NM_000686	AGTR2	Body	NA	NA	0.688477	0.269491	-0.608569	9.22053e-07	0.000140003
cg01047586	NA	NA	NA	NA	NA	0.150035	0.536164	2.5736	9.24482e-07	0.000140155
cg26151467	NM_005986	SOX1	1stExon	chr13:112720564-112723582	S_Shore	0.305899	0.6828	1.23211	9.24224e-07	0.00014017
cg19936954	NM_002826	QSOX1	Body	NA	NA	0.343575	0.120364	-0.649673	9.26622e-07	0.000140425
cg26312191	NM_003004	SECTM1	3'UTR	chr17:80278861-80279563	Island	0.352798	0.103582	-0.706399	9.27532e-07	0.000140509
cg00699219	NA	NA	NA	NA	NA	0.205668	0.495573	1.40957	9.29618e-07	0.000140608
cg09068447	NM_024713	KATNBL1	TSS1500	chr15:34501701-34502499	Island	0.0974336	0.0443545	-0.544772	9.28962e-07	0.000140617
cg17755386	NM_001012	RPS8	Body	chr1:45241013-45241900	S_Shore	0.18713	0.0928364	-0.503894	9.30617e-07	0.000140705
cg08833577	NM_199131	VAX1	TSS1500	chr10:118899247-118900329	Island	0.175516	0.513727	1.92696	9.31553e-07	0.000140792
cg16387850	NA	NA	NA	NA	NA	0.180187	0.0649909	-0.639314	9.3194e-07	0.000140796
cg13759905	NA	NA	NA	NA	NA	0.336203	0.0972818	-0.710645	9.32674e-07	0.000140853
cg05286653	NM_022462	HIF3A	TSS1500	chr19:46800053-46800603	Island	0.301103	0.104164	-0.654059	9.33496e-07	0.000140923
cg00710862	NM_006464	TGOLN2	3'UTR	NA	NA	0.581909	0.216036	-0.628745	9.33895e-07	0.000140929
cg26371512	NM_022484	TMEM168	TSS1500	chr7:112429980-112430566	S_Shore	0.0770619	0.0377818	-0.509721	9.34843e-07	0.000141018
cg23513966	NM_145805	ISL2	Body	chr15:76630029-76630970	Island	0.258438	0.466327	0.804406	9.36867e-07	0.000141269
cg25373998	NM_001166660	NLGN3	TSS1500	NA	NA	0.643268	0.311273	-0.516107	9.40057e-07	0.000141424
cg03728395	NM_006464	TGOLN2	TSS1500	chr2:85554134-85555414	S_Shore	0.566691	0.234518	-0.586162	9.39459e-07	0.000141442
cg26207239	NM_001166	BIRC2	Body	NA	NA	0.364296	0.6666	0.829828	9.46056e-07	0.000142054
cg00207428	NM_172168	NOXO1	TSS1500	chr16:2033492-2034800	N_Shore	0.538365	0.179464	-0.66665	9.53284e-07	0.000142757
cg14506175	NM_054012	ASS1	Body	NA	NA	0.103285	0.0491364	-0.524264	9.55572e-07	0.000142991
cg02241986	NM_005185	CALML3	TSS1500	chr10:5567122-5567828	N_Shore	0.512838	0.173636	-0.661421	9.57428e-07	0.000143214
cg26892635	NM_012360	OR1F1	TSS1500	NA	NA	0.255551	0.0784364	-0.69307	9.61671e-07	0.000143684
cg26340700	NR_028398	TSNAX-DISC1	TSS1500	chr1:231663999-231664608	N_Shore	0.402565	0.106945	-0.73434	9.61437e-07	0.000143704
cg23324787	NM_138787	C11orf74	5'UTR	NA	NA	0.457839	0.8134	0.776607	9.64261e-07	0.000143962
cg10843343	NM_002273	KRT8	Body	chr12:53297442-53297824	S_Shore	0.524711	0.261145	-0.502306	9.66439e-07	0.000144123
cg03892543	NM_021149	COTL1	Body	chr16:84650960-84651565	N_Shore	0.180446	0.0547	-0.696862	9.67412e-07	0.000144213
cg00700239	NM_194286	SRRM4	3'UTR	chr12:119591856-119592176	S_Shelf	0.75188	0.365982	-0.513244	9.71284e-07	0.00014468
cg01617280	NM_004225	MFHAS1	Body	chr8:8748652-8751478	N_Shelf	0.661968	0.287127	-0.566252	9.72401e-07	0.000144737
cg08363794	NM_014213	HOXD9	TSS1500	chr2:176986424-176988291	Island	0.239688	0.566255	1.36246	9.75285e-07	0.000144946
cg19314992	NM_018367	ACER3	Body	NA	NA	0.621412	0.219282	-0.647124	9.76078e-07	0.00014501
cg20038070	NM_016930	STX18	Body	NA	NA	0.754157	0.353091	-0.531807	9.7654e-07	0.000145023
cg19822251	NM_198560	LHFPL4	5'UTR	chr3:9595185-9595533	Island	0.10575	0.439927	3.16005	9.77444e-07	0.000145103
cg09418623	NM_000044	AR	1stExon	chrX:66766037-66766279	N_Shore	0.20916	0.396345	0.894937	9.78187e-07	0.000145158
cg16405019	NM_013945	PAX7	Body	chr1:18956895-18959829	Island	0.0853673	0.368145	3.31249	9.82689e-07	0.000145716
cg16680214	NM_002249	KCNN3	Body	NA	NA	0.34489	0.0914818	-0.734751	9.85619e-07	0.00014593
cg01774704	NA	NA	NA	NA	NA	0.24594	0.404882	0.646264	9.88355e-07	0.000146225
cg27360727	NA	NA	NA	NA	NA	0.420255	0.767182	0.825516	9.89442e-07	0.00014633
cg12937151	NA	NA	NA	NA	NA	0.370495	0.147118	-0.602914	9.92337e-07	0.000146648
cg13084525	NM_012153	EHF	TSS1500	NA	NA	0.523866	0.125555	-0.760331	9.94979e-07	0.000146928
cg03369957	NM_016188	ACTL6B	Body	chr7:100253782-100254150	N_Shore	0.682229	0.257482	-0.622588	9.95735e-07	0.000146984
cg09453312	NM_005546	ITK	1stExon	NA	NA	0.369861	0.756045	1.04413	9.9909e-07	0.000147424
cg00747152	NM_001005335	HNRNPL	5'UTR	chr19:39339923-39343257	N_Shore	0.0999027	0.0462818	-0.536731	1.00159e-06	0.000147738
cg09217157	NM_001164182	ENTPD1	Body	NA	NA	0.632847	0.240227	-0.620402	1.00398e-06	0.000148034
cg04053108	NM_000552	VWF	Body	chr12:6165941-6166257	Island	0.240619	0.586745	1.43849	1.00468e-06	0.000148082
cg10141019	NM_016564	CEND1	TSS200	chr11:791953-792400	N_Shore	0.0553389	0.0203	-0.63317	1.00511e-06	0.00014809
cg12167239	NM_005984	SLC25A1	TSS1500	chr22:19165061-19166816	Island	0.0949469	0.0424273	-0.553147	1.01037e-06	0.000148475
cg07266431	NM_001145306	CDK6	Body	chr7:92462201-92466387	N_Shelf	0.315511	0.669945	1.12337	1.01013e-06	0.000148551
cg14032089	NM_030938	VMP1	3'UTR	NA	NA	0.693658	0.201645	-0.709301	1.00955e-06	0.000148577
cg12152540	NM_173576	MKX	Body	chr10:28030182-28035211	N_Shelf	0.656588	0.3255	-0.504256	1.01188e-06	0.000148641
cg25065131	NR_024467	HECTD2-AS1	Body	NA	NA	0.668535	0.324291	-0.514923	1.01304e-06	0.000148757
cg24023289	NM_001166119	LEF1	Body	chr4:109087747-109090407	N_Shore	0.12777	0.526445	3.12026	1.01606e-06	0.000149143
cg14997707	NA	NA	NA	NA	NA	0.451878	0.179818	-0.602065	1.0182e-06	0.00014929
cg24168221	NM_001008693	CST9	TSS1500	NA	NA	0.475206	0.149164	-0.686108	1.02418e-06	0.000149887
cg00679763	NM_023079	UBE2Z	Body	NA	NA	0.832762	0.215827	-0.74083	1.02731e-06	0.00015029
cg25652701	NM_020725	ATXN7L1	Body	NA	NA	0.354416	0.599391	0.691208	1.03495e-06	0.000151294
cg23941599	NM_020177	FEM1C	TSS1500	chr5:114880113-114880772	S_Shore	0.148566	0.0513818	-0.654149	1.03556e-06	0.000151327
cg15174623	NA	NA	NA	NA	NA	0.240391	0.494809	1.05835	1.03636e-06	0.000151387
cg24593832	NA	NA	NA	NA	NA	0.645505	0.218673	-0.661238	1.03719e-06	0.000151452
cg20322193	NM_005402	RALA	5'UTR	chr7:39662543-39663792	S_Shore	0.334574	0.158464	-0.526372	1.03805e-06	0.000151522
cg20006618	NM_001145673	SORBS2	5'UTR	NA	NA	0.702673	0.2989	-0.574624	1.03892e-06	0.000151536
cg26595643	NM_199131	VAX1	TSS1500	chr10:118899247-118900329	Island	0.121954	0.408655	2.35089	1.04127e-06	0.00015171
cg27295342	NA	NA	NA	NA	NA	0.374519	0.716109	0.912074	1.0429e-06	0.00015189
cg01335087	NM_000754	COMT	Body	NA	NA	0.6842	0.330445	-0.517034	1.04619e-06	0.000152201
cg00209038	NM_000233	LHCGR	1stExon	chr2:48982621-48982958	Island	0.108704	0.468255	3.30759	1.05113e-06	0.000152411
cg26315985	NM_002227	JAK1	5'UTR	NA	NA	0.704989	0.202291	-0.713058	1.05844e-06	0.000153189
cg23197460	NM_003601	SMARCA5	Body	chr4:144434249-144435343	S_Shore	0.244193	0.108482	-0.555754	1.0584e-06	0.000153239
cg20696451	NM_016299	HSPA14	Body	chr10:14879769-14881041	S_Shore	0.726369	0.343555	-0.527025	1.06165e-06	0.000153539
cg13490971	NM_030571	NDFIP1	TSS1500	chr5:141488316-141488919	N_Shore	0.303519	0.0915364	-0.698417	1.06516e-06	0.000153821
cg24165760	NM_145726	TRAF3	TSS1500	NA	NA	0.0661389	0.0304455	-0.539674	1.06441e-06	0.000153826
cg01586851	NA	NA	NA	NA	NA	0.629986	0.235582	-0.626052	1.06484e-06	0.000153831
cg24726496	NM_001017437	CCDC157	TSS1500	chr22:30752583-30753214	N_Shore	0.072923	0.0360273	-0.505955	1.07309e-06	0.000154852
cg04370247	NM_014661	FAM53B	3'UTR	NA	NA	0.514917	0.200336	-0.610935	1.08146e-06	0.000155945
cg25975256	NA	NA	NA	NA	NA	0.167529	0.067	-0.60007	1.0845e-06	0.00015604
cg06704518	NM_002052	GATA4	5'UTR	chr8:11565217-11567212	Island	0.149276	0.452	2.02795	1.0849e-06	0.00015604
cg21870229	NM_003681	PDXK	Body	chr21:45148454-45149262	N_Shelf	0.111728	0.344518	2.08354	1.0839e-06	0.000156067
cg25436157	NM_032933	TMEM241	TSS1500	chr18:21017671-21018011	S_Shore	0.538939	0.2143	-0.602367	1.08313e-06	0.000156072
cg27310092	NA	NA	NA	NA	NA	0.502301	0.170991	-0.659585	1.08313e-06	0.000156128
cg05878887	NM_001042459	FILIP1L	Body	NA	NA	0.700784	0.317682	-0.546677	1.08936e-06	0.000156567
cg06829686	NA	NA	NA	NA	NA	0.130154	0.521836	3.00938	1.09154e-06	0.000156708
cg19163395	NM_001015053	HDAC5	Body	NA	NA	0.60682	0.149991	-0.752825	1.09622e-06	0.00015715
cg15376996	NM_002972	SBF1	Body	chr22:50912550-50913857	Island	0.435465	0.102627	-0.764327	1.09608e-06	0.000157188
cg09662496	NA	NA	NA	NA	NA	0.595088	0.277927	-0.532964	1.09841e-06	0.000157406
cg09253316	NA	NA	NA	NA	NA	0.0839035	0.0353182	-0.579062	1.0999e-06	0.000157506
cg24301620	NM_021956	GRIK2	1stExon	chr6:101846766-101847135	Island	0.253528	0.590664	1.32977	1.1006e-06	0.000157547
cg06177568	NA	NA	NA	NA	NA	0.159257	0.583518	2.66401	1.1039e-06	0.000157847
cg24456654	NA	NA	NA	NA	NA	0.174727	0.551645	2.15718	1.10368e-06	0.000157874
cg02152578	NM_006621	AHCYL1	TSS1500	chr1:110527248-110528026	N_Shore	0.165116	0.0577818	-0.650053	1.10542e-06	0.000158007
cg00778928	NM_001080527	MYO7B	Body	chr2:128381585-128381890	N_Shore	0.639814	0.316991	-0.504558	1.10801e-06	0.00015832
cg09048205	NR_003713	LOC728613	Body	NA	NA	0.322181	0.560973	0.741175	1.11131e-06	0.000158734
cg16846332	NM_152226	PPEF1	Body	NA	NA	0.644126	0.287191	-0.554138	1.11402e-06	0.000159005
cg18440839	NM_012154	AGO2	Body	NA	NA	0.338001	0.773509	1.28848	1.11375e-06	0.000159025
cg05107535	NA	NA	NA	NA	NA	0.54381	0.842436	0.549138	1.11526e-06	0.000159125
cg23370883	NM_021223	MYL7	Body	NA	NA	0.678358	0.325764	-0.519776	1.11572e-06	0.000159132
cg24682012	NM_000543	SMPD1	TSS1500	chr11:6411346-6411913	N_Shore	0.297587	0.131173	-0.559212	1.11836e-06	0.000159394
cg08462194	NM_024165	PHF1	3'UTR	chr6:33385678-33386262	N_Shore	0.804904	0.374382	-0.534874	1.12169e-06	0.000159809
cg12155547	NA	NA	NA	NA	NA	0.512383	0.122318	-0.761276	1.12334e-06	0.000159928
cg01431057	NM_002964	S100A8	Body	NA	NA	0.770039	0.384882	-0.500179	1.12299e-06	0.000159936
cg08462988	NA	NA	NA	NA	NA	0.164858	0.505191	2.06441	1.13203e-06	0.000160816
cg17250262	NM_030915	LBH	Body	chr2:30453566-30455655	S_Shore	0.456129	0.164427	-0.639516	1.13176e-06	0.000160835
cg20935165	NA	NA	NA	NA	NA	0.0686106	0.415027	5.04902	1.13624e-06	0.00016124
cg00107970	NA	NA	NA	NA	NA	0.79288	0.213727	-0.730442	1.14658e-06	0.000162354
cg24945701	NA	NA	NA	NA	NA	0.183985	0.5992	2.25679	1.14825e-06	0.000162473
cg27109748	NM_001013836	MAD1L1	Body	NA	NA	0.889076	0.434082	-0.511761	1.14917e-06	0.000162545
cg11402505	NM_178820	FBXO27	TSS1500	chr19:39522264-39523227	S_Shore	0.203188	0.0720818	-0.645247	1.1533e-06	0.000163012
cg13709271	NM_145021	2018-03-08	Body	NA	NA	0.42721	0.785909	0.839633	1.1559e-06	0.000163261
cg10964160	NM_018142	INTS10	TSS1500	chr8:19674263-19675236	N_Shore	0.199944	0.0799091	-0.600343	1.15728e-06	0.000163398
cg10846615	NA	NA	NA	NA	NA	0.131658	0.641255	3.87059	1.15776e-06	0.000163407
cg08778598	NR_003263	SDHAP3	Body	chr5:1594238-1595027	Island	0.137997	0.358418	1.59728	1.16213e-06	0.000163788
cg21542842	NM_018243	2018-09-11	Body	NA	NA	0.425164	0.701709	0.650444	1.16212e-06	0.000163846
cg04349420	NA	NA	NA	NA	NA	0.310971	0.0906909	-0.708362	1.166e-06	0.000164156
cg24981097	NM_001032296	STK24	Body	chr13:99228319-99229576	N_Shelf	0.605162	0.228318	-0.622716	1.17919e-06	0.000165717
cg19584674	NM_015299	KHNYN	TSS1500	chr14:24898779-24899288	Island	0.280811	0.0840727	-0.700607	1.17968e-06	0.000165727
cg24604013	NM_005986	SOX1	TSS1500	chr13:112720564-112723582	Island	0.0798504	0.5098	5.38444	1.18093e-06	0.000165783
cg01461211	NA	NA	NA	NA	NA	0.173598	0.320036	0.843546	1.18866e-06	0.00016669
cg00772091	NM_004725	BUB3	Body	chr10:124913631-124914726	S_Shore	0.5246	0.203791	-0.611531	1.18924e-06	0.000166711
cg27624327	NM_004174	SLC9A3	Body	chr5:507745-508835	S_Shore	0.719565	0.352818	-0.509679	1.18854e-06	0.000166733
cg14591123	NM_015873	VILL	Body	chr3:38040289-38040535	Island	0.291186	0.0755364	-0.740591	1.1979e-06	0.000167805
cg16609872	NM_181798	KCNQ1	Body	chr11:2828445-2828884	N_Shore	0.65715	0.231355	-0.647942	1.19861e-06	0.000167846
cg02550691	NM_001002914	KCTD11	1stExon	chr17:7254622-7255808	Island	0.252672	0.0907545	-0.64082	1.20041e-06	0.000168037
cg20927567	NR_000010	SNORD4A	Body	chr17:27052941-27054084	N_Shelf	0.719803	0.314773	-0.562696	1.20908e-06	0.00016901
cg02782895	NM_015720	PODXL2	Body	chr3:127347682-127348859	Island	0.315425	0.118182	-0.625325	1.21113e-06	0.000169176
cg14568384	NM_024789	MFSD13A	TSS1500	chr10:104220983-104221287	N_Shore	0.129922	0.0554273	-0.573381	1.21777e-06	0.000169741
cg19453991	NA	NA	NA	NA	NA	0.0637991	0.403736	5.32824	1.21742e-06	0.000169753
cg18717146	NM_152482	C19orf25	Body	chr19:1478603-1479621	Island	0.22146	0.101609	-0.541186	1.21702e-06	0.000169757
cg04639610	NA	NA	NA	NA	NA	0.461032	0.2106	-0.543199	1.2237e-06	0.000170326
cg08551619	NM_001085451	LNP1	TSS1500	chr3:100119504-100120857	N_Shore	0.148496	0.0613091	-0.587134	1.22495e-06	0.000170439
cg13985485	NA	NA	NA	NA	NA	0.0584195	0.346427	4.93	1.22863e-06	0.000170709
cg15518113	NM_198053	CD247	3'UTR	NA	NA	0.818642	0.315355	-0.614783	1.22859e-06	0.000170764
cg22827250	NM_002653	PITX1	3'UTR	chr5:134363092-134365146	Island	0.199542	0.490182	1.45654	1.23417e-06	0.000171298
cg05029625	NA	NA	NA	NA	NA	0.255939	0.393327	0.536801	1.23335e-06	0.000171305
cg02938414	NA	NA	NA	NA	NA	0.174385	0.423118	1.42635	1.23415e-06	0.000171355
cg18655633	NA	NA	NA	NA	NA	0.558656	0.153482	-0.725266	1.23931e-06	0.000171708
cg19994779	NM_017955	CDCA4	5'UTR	chr14:105486611-105487915	N_Shelf	0.607942	0.278064	-0.542615	1.23861e-06	0.000171793
cg06077978	NM_013271	PCSK1N	Body	chrX:48689589-48690827	Island	0.228698	0.472136	1.06445	1.25007e-06	0.000172832
cg18108008	NM_001720	BMP8B	5'UTR	chr1:40253683-40255172	Island	0.0424124	0.0201909	-0.523938	1.25186e-06	0.000173019
cg03147185	NM_015341	NCAPH	Body	NA	NA	0.472502	0.150645	-0.681175	1.2533e-06	0.000173097
cg13558371	NM_173689	CRB2	Body	chr9:126135407-126136193	Island	0.222164	0.473255	1.13021	1.25529e-06	0.000173248
cg05222995	NA	NA	NA	NA	NA	0.147851	0.571164	2.86309	1.255e-06	0.00017327
cg00858840	NM_001003845	SP5	Body	chr2:171569877-171573904	Island	0.189057	0.461191	1.43943	1.25642e-06	0.000173283
cg25357825	NM_014667	VGLL4	Body	NA	NA	0.486924	0.779336	0.60053	1.26488e-06	0.000174389
cg14322681	NM_003930	SKAP2	5'UTR	chr7:26903869-26904753	Island	0.0376248	0.0181727	-0.517001	1.26706e-06	0.000174505
cg17367077	NM_004219	PTTG1	Body	chr5:159848779-159849113	S_Shore	0.683279	0.312473	-0.542686	1.26665e-06	0.00017451
cg16254756	NM_001130040	SHC1	TSS1500	chr1:154946237-154946498	N_Shelf	0.555684	0.257709	-0.536231	1.26788e-06	0.000174557
cg02286091	NM_001713	BHMT	1stExon	NA	NA	0.171175	0.532891	2.11313	1.27252e-06	0.000175012
cg19196806	NM_012257	HBP1	5'UTR	NA	NA	0.641749	0.284391	-0.55685	1.27833e-06	0.000175688
cg00529742	NA	NA	NA	NA	NA	0.674386	0.267191	-0.603801	1.27809e-06	0.000175716
cg00524486	NM_002458	MUC5B	TSS200	chr11:1247830-1248140	N_Shelf	0.470936	0.202218	-0.570604	1.28423e-06	0.000176375
cg00468395	NM_015171	XPO6	Body	NA	NA	0.695579	0.333227	-0.520935	1.29547e-06	0.00017767
cg07462756	NM_002448	MSX1	TSS1500	chr4:4859632-4860191	Island	0.166465	0.454745	1.73177	1.29687e-06	0.000177801
cg00377497	NM_171982	TRIM35	Body	chr8:27168205-27169082	N_Shore	0.672328	0.278627	-0.585579	1.2983e-06	0.000177872
cg11530213	NM_000930	PLAT	Body	NA	NA	0.692027	0.162127	-0.765721	1.30089e-06	0.000178165
cg16697850	NR_024346	MOXD2P	TSS200	NA	NA	0.729415	0.340318	-0.533437	1.30172e-06	0.000178216
cg10064339	NM_003355	UCP2	5'UTR	chr11:73693702-73694802	Island	0.0482619	0.0192818	-0.600476	1.30365e-06	0.000178418
cg10179949	NM_020125	SLAMF8	TSS1500	NA	NA	0.117967	0.372564	2.1582	1.30551e-06	0.000178611
cg10489124	NM_016499	TMEM216	TSS200	chr11:61159836-61160285	N_Shore	0.249331	0.0649545	-0.739485	1.30879e-06	0.000178873
cg00006397	NM_005598	NHLH1	TSS200	chr1:160340604-160340843	N_Shelf	0.668219	0.327236	-0.510285	1.31319e-06	0.000179224
cg11576424	NM_001013717	C5orf56	5'UTR	chr5:131746225-131746876	S_Shelf	0.639093	0.176373	-0.724026	1.32036e-06	0.000179827
cg09834794	NA	NA	NA	NA	NA	0.186565	0.557991	1.99086	1.32411e-06	0.000180213
cg14502484	NM_001044	SLC6A3	TSS1500	chr5:1444678-1446648	Island	0.157235	0.497155	2.16187	1.32394e-06	0.000180253
cg06207120	NA	NA	NA	NA	NA	0.322928	0.693691	1.14813	1.32761e-06	0.000180565
cg01421252	NA	NA	NA	NA	NA	0.702663	0.288873	-0.588889	1.33272e-06	0.000181134
cg11452571	NM_198850	PHLDB3	3'UTR	chr19:43979359-43979684	Island	0.0439805	0.0136273	-0.690152	1.34293e-06	0.000182332
cg16971885	NM_173812	DPY19L2	TSS1500	chr12:64061836-64062774	S_Shore	0.0636372	0.187155	1.94096	1.34461e-06	0.000182498
cg11822932	NM_005574	LMO2	5'UTR	NA	NA	0.483781	0.790018	0.633006	1.35211e-06	0.000183198
cg25271892	NM_000738	CHRM1	TSS1500	chr11:62690974-62691488	N_Shore	0.277362	0.120009	-0.56732	1.35601e-06	0.000183537
cg06936155	NA	NA	NA	NA	NA	0.0876398	0.397418	3.53468	1.36023e-06	0.000183728
cg01357892	NM_001040653	ZXDC	Body	chr3:126193683-126195495	N_Shelf	0.588819	0.144536	-0.754532	1.36007e-06	0.00018377
cg12539171	NM_001032363	MINOS1	TSS1500	chr1:19923341-19924002	N_Shore	0.116916	0.0378	-0.676691	1.35988e-06	0.000183808
cg03462322	NM_001015054	MPG	TSS1500	chr16:127448-128631	N_Shore	0.225197	0.684018	2.03742	1.36683e-06	0.000184239
cg25286333	NM_207396	RNF207	Body	chr1:6268820-6269588	Island	0.0903761	0.332464	2.67867	1.36668e-06	0.000184283
cg23517116	NA	NA	NA	NA	NA	0.165881	0.420436	1.53457	1.36662e-06	0.000184338
cg13781956	NM_002160	TNC	Body	NA	NA	0.603999	0.260291	-0.569054	1.36585e-06	0.00018436
cg22122808	NM_001915	CYB561	3'UTR	chr17:61511653-61511886	Island	0.399954	0.693445	0.733813	1.37003e-06	0.000184544
cg15991175	NM_025222	WDR82	TSS1500	chr3:52312069-52313057	S_Shore	0.680226	0.274618	-0.596284	1.3786e-06	0.000185317
cg00555420	NM_153365	TAPT1	Body	NA	NA	0.16725	0.640091	2.82714	1.37842e-06	0.000185357
cg20160127	NR_003099	ZNF273	Body	NA	NA	0.264191	0.418373	0.583599	1.37798e-06	0.00018536
cg09108394	NM_002738	PRKCB	Body	chr16:23846941-23848102	S_Shelf	0.640927	0.240082	-0.625414	1.38316e-06	0.000185803
cg17847861	NM_000713	BLVRB	TSS1500	chr19:40971476-40973393	Island	0.214366	0.0960909	-0.551744	1.38627e-06	0.000186157
cg23387468	NM_016019	LUC7L2	Body	NA	NA	0.51799	0.817327	0.577882	1.38736e-06	0.00018624
cg00647262	NM_018452	TMEM242	TSS1500	chr6:157744004-157745217	S_Shore	0.783471	0.366073	-0.532755	1.38922e-06	0.000186362
cg10997479	NA	NA	NA	NA	NA	0.199819	0.458527	1.29472	1.38896e-06	0.000186391
cg10600647	NM_018014	BCL11A	Body	NA	NA	0.70536	0.346482	-0.508787	1.39701e-06	0.000187151
cg14404418	NA	NA	NA	NA	NA	0.671519	0.313455	-0.533215	1.40447e-06	0.00018783
cg07493435	NA	NA	NA	NA	NA	0.3122	0.569236	0.823307	1.40809e-06	0.000187994
cg12597839	NM_001134404	CYB561D1	TSS1500	chr1:110036545-110036943	N_Shore	0.676181	0.318164	-0.529469	1.41254e-06	0.000188268
cg26217402	NM_001043318	ELMSAN1	5'UTR	NA	NA	0.569733	0.267818	-0.529923	1.41344e-06	0.000188324
cg13422850	NM_032536	NTNG2	Body	chr9:135116147-135117929	Island	0.0312885	0.0127545	-0.592357	1.42058e-06	0.000189147
cg08371140	NA	NA	NA	NA	NA	0.560985	0.202055	-0.639822	1.42431e-06	0.000189195
cg05942459	NM_021956	GRIK2	TSS200	chr6:101846766-101847135	Island	0.106338	0.564418	4.30777	1.42249e-06	0.000189209
cg02650512	NR_000010	SNORD4A	TSS1500	chr17:27046856-27047273	S_Shore	0.771754	0.286464	-0.628815	1.42399e-06	0.000189216
cg01426808	NA	NA	NA	NA	NA	0.490844	0.787655	0.604693	1.42813e-06	0.00018951
cg13300273	NM_005298	GPR25	1stExon	chr1:200842196-200843388	Island	0.147552	0.560764	2.80044	1.43393e-06	0.000190151
cg10118167	NM_005761	PLXNC1	Body	NA	NA	0.552773	0.208664	-0.622515	1.43381e-06	0.000190199
cg14204462	NA	NA	NA	NA	NA	0.129607	0.313427	1.41829	1.43511e-06	0.000190243
cg08465307	NR_024455	LINC01134	Body	chr1:3824219-3824456	S_Shelf	0.627381	0.1737	-0.723135	1.43706e-06	0.000190373
cg01987702	NA	NA	NA	NA	NA	0.464585	0.736945	0.586245	1.43996e-06	0.000190501
cg06237697	NR_029856	MIR365B	TSS200	NA	NA	0.771664	0.3669	-0.524534	1.43957e-06	0.000190513
cg25839482	NM_018285	IMP3	1stExon	chr15:75931952-75932782	Island	0.104942	0.0337818	-0.678092	1.45144e-06	0.000191631
cg08919597	NM_006290	TNFAIP3	Body	NA	NA	0.708281	0.248255	-0.649497	1.45292e-06	0.000191698
cg26727372	NM_002396	ME2	TSS1500	chr18:48405135-48405983	N_Shore	0.388899	0.159609	-0.589587	1.45953e-06	0.000192247
cg23261743	NA	NA	NA	NA	NA	0.712919	0.338882	-0.524656	1.46218e-06	0.000192532
cg25282072	NM_002477	MYL5	TSS1500	chr4:668051-668726	S_Shore	0.638058	0.303091	-0.524979	1.46934e-06	0.000193279
cg01799588	NM_033092	TRIM5	TSS200	NA	NA	0.117292	0.0356636	-0.695942	1.47066e-06	0.000193389
cg16603916	NM_001113348	ECE1	Body	chr1:21616380-21617101	N_Shore	0.748744	0.369864	-0.506021	1.47711e-06	0.000193977
cg00078456	NM_001170688	MIB2	Body	chr1:1564421-1570006	Island	0.493241	0.186336	-0.62222	1.47829e-06	0.000194067
cg19507032	NM_148962	OXER1	TSS200	NA	NA	0.306937	0.573955	0.869941	1.48096e-06	0.000194158
cg12655059	NM_032752	ZNF496	Body	chr1:247494249-247495840	N_Shelf	0.457085	0.815055	0.783158	1.48531e-06	0.000194533
cg02362103	NM_152380	TBX15	TSS1500	chr1:119531991-119532196	S_Shore	0.10331	0.474755	3.59545	1.48823e-06	0.000194851
cg04508951	NA	NA	NA	NA	NA	0.696065	0.199155	-0.713885	1.49495e-06	0.000195535
cg02861926	NM_145007	NLRP11	TSS1500	NA	NA	0.572919	0.248155	-0.56686	1.49766e-06	0.000195759
cg21944749	NM_030952	NUAK2	1stExon	chr1:205290232-205291035	Island	0.106533	0.0504	-0.526906	1.49862e-06	0.00019582
cg20181887	NM_004642	CDK2AP1	Body	chr12:123754049-123754373	N_Shore	0.556903	0.895918	0.608752	1.50095e-06	0.000195928
cg16340422	NM_178836	PLD6	TSS1500	chr17:17109893-17110296	Island	0.50865	0.126991	-0.750338	1.50934e-06	0.000196631
cg15306060	NR_000026	SNORD139	TSS200	chr22:39715473-39715945	N_Shelf	0.808989	0.322509	-0.601343	1.51158e-06	0.000196792
cg27666046	NM_003004	SECTM1	3'UTR	chr17:80278861-80279563	Island	0.533802	0.127064	-0.761965	1.51126e-06	0.000196817
cg04492228	NM_002051	GATA3	Body	chr10:8100384-8100768	S_Shore	0.300539	0.632436	1.10434	1.52309e-06	0.000198095
cg16919569	NR_003679	HAND2-AS1	Body	chr4:174451828-174452962	Island	0.315616	0.710664	1.25167	1.52852e-06	0.000198669
cg22851694	NA	NA	NA	NA	NA	0.66201	0.322691	-0.512559	1.52805e-06	0.000198673
cg16404342	NM_001031617	COX19	TSS200	chr7:1014698-1015239	Island	0.0621009	0.0192182	-0.690533	1.53474e-06	0.000199345
cg07941927	NA	NA	NA	NA	NA	0.121781	0.397409	2.2633	1.53722e-06	0.000199601
cg24495585	NA	NA	NA	NA	NA	0.0709566	0.567555	6.99861	1.53829e-06	0.000199675
cg15545247	NM_006018	HCAR3	1stExon	NA	NA	0.75733	0.3274	-0.567692	1.53944e-06	0.000199758
cg01727145	NM_005876	SPEG	Body	chr2:220312698-220314094	Island	0.0837708	0.462218	4.51765	1.54046e-06	0.000199823
cg08235161	NA	NA	NA	NA	NA	0.178387	0.506136	1.8373	1.55002e-06	0.0002006
cg12184624	NM_001129742	CALHM3	TSS200	NA	NA	0.760482	0.368391	-0.515583	1.54955e-06	0.000200605
cg12526197	NM_004481	GALNT2	3'UTR	chr1:230415342-230415689	S_Shore	0.45278	0.780391	0.723556	1.55114e-06	0.000200678
cg20848988	NM_030636	EEPD1	Body	NA	NA	0.252337	0.667909	1.64689	1.55368e-06	0.000200808
cg04741211	NM_019063	EML4	Body	chr2:42396301-42396933	S_Shelf	0.857461	0.255591	-0.701921	1.55322e-06	0.000200815
cg21587372	NM_003089	SNRNP70	5'UTR	chr19:49588358-49589080	S_Shore	0.292005	0.0871273	-0.701624	1.55717e-06	0.000201062
cg07015911	NM_024015	HOXB4	1stExon	chr17:46655215-46655604	Island	0.0808035	0.405264	4.01542	1.56086e-06	0.000201406
cg22948288	NM_004527	MEOX1	TSS1500	NA	NA	0.749381	0.262582	-0.649602	1.56071e-06	0.000201452
cg18295183	NM_000816	GABRG2	1stExon	NA	NA	0.234499	0.522545	1.22835	1.56253e-06	0.000201489
cg19883813	NM_002051	GATA3	Body	chr10:8091374-8098329	Island	0.239116	0.520091	1.17506	1.56951e-06	0.000202256
cg15092343	NM_002448	MSX1	TSS1500	chr4:4859632-4860191	Island	0.106325	0.608827	4.72611	1.57414e-06	0.000202719
cg15036326	NR_000010	SNORD4A	TSS1500	chr17:27046856-27047273	S_Shore	0.800179	0.307636	-0.61554	1.57835e-06	0.000202795
cg17326555	NA	NA	NA	NA	NA	0.342542	0.633418	0.849167	1.57919e-06	0.000202837
cg14679780	NM_015898	ZBTB7A	5'UTR	chr19:4059917-4060131	N_Shore	0.752773	0.240909	-0.679971	1.57786e-06	0.000202932
cg18479593	NA	NA	NA	NA	NA	0.089454	0.634736	6.09567	1.57774e-06	0.000202983
cg13941374	NA	NA	NA	NA	NA	0.0574283	0.0206727	-0.640026	1.5777e-06	0.000203045
cg15640140	NR_001593	RPL18AP3	Body	chr19:17970454-17971123	S_Shore	0.80672	0.382491	-0.525869	1.58291e-06	0.000203182
cg07934561	NA	NA	NA	NA	NA	0.745196	0.3639	-0.511672	1.58515e-06	0.000203337
cg00898111	NM_001080466	BTBD17	TSS1500	chr17:72356096-72356327	S_Shelf	0.507196	0.192155	-0.621144	1.58915e-06	0.000203784
cg04337534	NM_033036	GAL3ST3	TSS200	chr11:65816404-65816665	S_Shore	0.146879	0.371445	1.52893	1.5912e-06	0.00020398
cg02037307	NM_002653	PITX1	3'UTR	chr5:134363092-134365146	Island	0.213165	0.587664	1.75684	1.59635e-06	0.000204439
cg18551877	NM_145016	GLYATL2	TSS200	NA	NA	0.353291	0.118318	-0.665097	1.60412e-06	0.0002051
cg22920300	NR_004053	SOX2-OT	Body	chr3:181444409-181445000	N_Shelf	0.155765	0.567409	2.64271	1.60743e-06	0.000205322
cg26460530	NA	NA	NA	NA	NA	0.281083	0.062	-0.779425	1.60706e-06	0.000205342
cg11906021	NA	NA	NA	NA	NA	0.771011	0.226755	-0.7059	1.60656e-06	0.000205345
cg13350173	NA	NA	NA	NA	NA	0.465539	0.722445	0.551848	1.60907e-06	0.000205465
cg24599650	NM_033301	RPL8	Body	chr8:146016927-146018664	N_Shore	0.627984	0.237364	-0.622023	1.61112e-06	0.00020566
cg03924800	NA	NA	NA	NA	NA	0.0685929	0.0261455	-0.618832	1.62242e-06	0.000206901
cg09535960	NM_002318	LOXL2	Body	NA	NA	0.423007	0.110909	-0.737808	1.62563e-06	0.000207176
cg17023034	NM_001145798	CACNB4	Body	NA	NA	0.618483	0.291645	-0.52845	1.63029e-06	0.000207635
cg22682200	NA	NA	NA	NA	NA	0.470601	0.150055	-0.681143	1.63797e-06	0.00020814
cg19315081	NM_001124	ADM	TSS1500	chr11:10326048-10326590	Island	0.0940867	0.0337273	-0.64153	1.63978e-06	0.000208235
cg05359249	NM_024536	CHPF	Body	chr2:220406363-220406840	Island	0.0549407	0.0174818	-0.681806	1.64552e-06	0.000208695
cg19906672	NM_020773	TBC1D14	5'UTR	NA	NA	0.587777	0.192982	-0.671675	1.64517e-06	0.000208718
cg22055524	NA	NA	NA	NA	NA	0.178574	0.456482	1.55626	1.65038e-06	0.000208906
cg25304405	NM_001094	ASIC2	TSS1500	chr17:32484007-32484280	S_Shore	0.673242	0.252827	-0.624463	1.65608e-06	0.000209022
cg03068497	NM_002047	GARS	Body	chr7:30634124-30635058	S_Shore	0.536553	0.194727	-0.637077	1.6567e-06	0.000209032
cg12230728	NM_001478	B4GALNT1	Body	chr12:58021294-58022037	Island	0.0281593	0.0933182	2.31394	1.6551e-06	0.000209032
cg04597545	NM_002819	PTBP1	Body	chr19:796506-798936	S_Shore	0.557929	0.221082	-0.603746	1.65246e-06	0.000209034
cg08386009	NM_004381	ATF6B	Body	chr6:32097820-32098086	N_Shelf	0.633022	0.251455	-0.602771	1.65734e-06	0.000209046
cg01577187	NM_001004722	NCK2	5'UTR	chr2:106361032-106362218	S_Shore	0.206139	0.0568	-0.724458	1.65509e-06	0.000209097
cg11804414	NM_138929	DIABLO	TSS200	chr12:122710054-122711371	S_Shore	0.370518	0.732918	0.978092	1.65492e-06	0.000209143
cg07939743	NA	NA	NA	NA	NA	0.600796	0.2548	-0.575896	1.66238e-06	0.00020948
cg25740565	NR_026830	SATB2-AS1	Body	chr2:200335497-200336413	N_Shore	0.0865407	0.514918	4.95001	1.66442e-06	0.000209669
cg19888870	NM_004947	DOCK3	Body	NA	NA	0.739407	0.317118	-0.571118	1.67372e-06	0.000210368
cg03891318	NM_178177	NMNAT3	5'UTR	NA	NA	0.622724	0.273409	-0.560947	1.67477e-06	0.000210433
cg02582957	NA	NA	NA	NA	NA	0.126237	0.374527	1.96685	1.68956e-06	0.000211953
cg13655303	NM_002591	PCK1	TSS1500	NA	NA	0.684162	0.293564	-0.570915	1.69899e-06	0.000212931
cg01142721	NM_001017924	LRIT2	TSS200	NA	NA	0.351541	0.1257	-0.642431	1.70505e-06	0.000213554
cg10789170	NM_014332	SMPX	Body	NA	NA	0.531918	0.245736	-0.538018	1.70699e-06	0.000213594
cg04264002	NM_006291	TNFAIP2	1stExon	chr14:103593234-103593923	N_Shore	0.677068	0.338391	-0.500211	1.70881e-06	0.000213753
cg06419959	NM_001130971	NSMF	TSS1500	chr9:140352818-140354044	Island	0.0594177	0.0291364	-0.509635	1.721e-06	0.000215209
cg14021478	NM_001014840	CUTA	Body	chr6:33385678-33386262	N_Shore	0.652559	0.239864	-0.632426	1.72421e-06	0.000215474
cg00118989	NM_001167577	TRPC7	TSS1500	NA	NA	0.488728	0.211173	-0.567914	1.7256e-06	0.000215578
cg25589890	NM_025218	ULBP1	TSS1500	chr6:150284682-150286515	Island	0.135585	0.0654273	-0.517444	1.72693e-06	0.000215675
cg10692140	NA	NA	NA	NA	NA	0.727365	0.1792	-0.753631	1.7296e-06	0.000215941
cg26918756	NM_001166215	S1PR5	Body	chr19:10624475-10625776	Island	0.236419	0.4354	0.841642	1.7344e-06	0.000216333
cg22881435	NM_025151	RAB11FIP1	Body	NA	NA	0.360232	0.749982	1.08194	1.74104e-06	0.000216886
cg11396628	NM_014068	PSORS1C1	5'UTR	NA	NA	0.40473	0.1855	-0.54167	1.74406e-06	0.000217125
cg27304729	NM_031448	C19orf12	5'UTR	chr19:30206040-30206497	N_Shore	0.357379	0.145518	-0.592818	1.75048e-06	0.000217578
cg03431918	NA	NA	NA	NA	NA	0.135183	0.0516273	-0.618094	1.74833e-06	0.000217587
cg15565533	NM_013334	GMPPB	TSS1500	chr3:49760863-49761895	S_Shore	0.0856018	0.0404182	-0.527835	1.74963e-06	0.00021761
cg17451586	NM_005104	BRD2	Body	chr6:32939275-32940954	S_Shore	0.106416	0.0382727	-0.640348	1.75472e-06	0.000218037
cg10880902	NA	NA	NA	NA	NA	0.500263	0.101927	-0.796253	1.75798e-06	0.000218097
cg11142389	NM_003412	ZIC1	TSS1500	chr3:147126988-147128999	N_Shore	0.284268	0.685427	1.4112	1.75632e-06	0.000218097
cg01077058	NA	NA	NA	NA	NA	0.764963	0.326073	-0.57374	1.75777e-06	0.000218139
cg20188739	NR_002599	SNHG6	Body	chr8:67837480-67837954	N_Shelf	0.662449	0.255255	-0.61468	1.76273e-06	0.000218547
cg00719668	NA	NA	NA	NA	NA	0.596113	0.296464	-0.502672	1.76538e-06	0.0002186
cg19402236	NM_001160030	FLT1	Body	NA	NA	0.432373	0.773891	0.789871	1.76531e-06	0.000218661
cg00904138	NM_033301	RPL8	Body	chr8:146016927-146018664	Island	0.0590681	0.0292273	-0.505194	1.7786e-06	0.000219821
cg19024599	NM_001099289	SH3RF3	Body	NA	NA	0.677567	0.3264	-0.518277	1.7785e-06	0.000219878
cg07807470	NR_030725	RCC1	Body	NA	NA	0.649286	0.2542	-0.608493	1.78039e-06	0.000219905
cg13794404	NA	NA	NA	NA	NA	0.477926	0.215882	-0.548294	1.7782e-06	0.00021991
cg06424065	NA	NA	NA	NA	NA	0.274407	0.662718	1.41509	1.7803e-06	0.000219963
cg22320365	NM_025248	SRCIN1	Body	chr17:36717727-36718593	Island	0.218571	0.516645	1.36374	1.78656e-06	0.000220528
cg15991405	NM_014213	HOXD9	Body	chr2:176989337-176989587	N_Shore	0.30383	0.718218	1.36388	1.78947e-06	0.000220678
cg06599169	NR_001593	RPL18AP3	Body	chr19:17970454-17971123	S_Shelf	0.687117	0.334664	-0.512945	1.79132e-06	0.000220768
cg23960707	NM_006924	SRSF1	Body	chr17:56083750-56085373	N_Shore	0.221381	0.0843364	-0.619045	1.79115e-06	0.000220816
cg03456797	NM_003933	BAIAP3	Body	chr16:1392544-1392753	Island	0.114259	0.0496636	-0.565343	1.79527e-06	0.000221117
cg05840553	NM_138361	LRSAM1	TSS1500	chr9:130213143-130214335	N_Shore	0.0686469	0.0269636	-0.607213	1.79866e-06	0.000221326
cg16971668	NM_005442	EOMES	TSS1500	chr3:27765196-27765675	N_Shore	0.160186	0.587136	2.66534	1.79783e-06	0.000221362
cg21190595	NM_001014437	CARS	Body	NA	NA	0.535947	0.185927	-0.653086	1.79966e-06	0.00022138
cg07569288	NM_001015	RPS11	Body	chr19:49999252-49999839	S_Shelf	0.857508	0.409636	-0.522294	1.80628e-06	0.000222124
cg14327531	NM_002051	GATA3	5'UTR	chr10:8091374-8098329	Island	0.193912	0.488518	1.51927	1.80767e-06	0.000222225
cg12050175	NA	NA	NA	NA	NA	0.611529	0.197364	-0.677262	1.81003e-06	0.000222376
cg11298343	NM_053046	EGLN2	TSS200	chr19:41306982-41307313	N_Shore	0.393152	0.154964	-0.605843	1.81156e-06	0.000222425
cg04701420	NM_001400	S1PR1	TSS1500	chr1:101701785-101702068	N_Shore	0.117134	0.0499091	-0.573913	1.81717e-06	0.000223044
cg04512966	NM_001935	DPP4	Body	NA	NA	0.364187	0.684173	0.878632	1.81865e-06	0.000223156
cg10661615	NM_004248	PRLHR	TSS200	chr10:120353692-120355821	Island	0.263443	0.492436	0.86923	1.82046e-06	0.000223238
cg00741986	NM_024309	TNIP2	Body	NA	NA	0.706386	0.273227	-0.613204	1.82044e-06	0.000223306
cg20437892	NA	NA	NA	NA	NA	0.205775	0.0786818	-0.617632	1.82524e-06	0.000223755
cg25202141	NM_019618	IL36G	TSS1500	NA	NA	0.71642	0.348536	-0.513503	1.84361e-06	0.000225795
cg23295629	NR_003367	PVT1	Body	NA	NA	0.52622	0.151145	-0.712772	1.84307e-06	0.000225799
cg25381017	NM_000564	IL5RA	5'UTR	NA	NA	0.525872	0.231609	-0.559571	1.84562e-06	0.0002259
cg21907579	NM_080717	TBX5	5'UTR	chr12:114845861-114847650	Island	0.156042	0.462182	1.9619	1.84967e-06	0.000225903
cg17372223	NM_001134231	NT5DC2	TSS1500	chr3:52567009-52568807	Island	0.258627	0.0944818	-0.634679	1.84864e-06	0.000225918
cg25841309	NM_006600	NUDC	Body	chr1:27248048-27248619	S_Shore	0.473681	0.207464	-0.562018	1.84811e-06	0.000225923
cg24185397	NA	NA	NA	NA	NA	0.303927	0.0831	-0.726579	1.84748e-06	0.000225987
cg12404590	NM_001080447	TTLL8	Body	chr22:50453056-50454137	S_Shore	0.738711	0.285864	-0.613024	1.85513e-06	0.000226218
cg05713859	NM_032151	PCBD2	TSS1500	chr5:134240254-134241314	N_Shore	0.100888	0.0414182	-0.589466	1.85494e-06	0.000226265
cg14155397	NM_002755	MAP2K1	TSS1500	chr15:66678895-66679963	N_Shore	0.387929	0.111736	-0.711967	1.86081e-06	0.000226699
cg13383814	NM_015652	LCOR	3'UTR	NA	NA	0.299669	0.53	0.768618	1.86235e-06	0.000226816
cg04904276	NM_015914	TXNDC11	Body	chr16:11836073-11837092	N_Shore	0.696708	0.155173	-0.777277	1.88179e-06	0.000228688
cg23820828	NM_001142462	OSR2	5'UTR	chr8:99960497-99961438	N_Shore	0.240044	0.584591	1.43535	1.88064e-06	0.00022869
cg16745033	NA	NA	NA	NA	NA	0.446355	0.167073	-0.625695	1.8813e-06	0.000228699
cg24282826	NM_001697	ATP5O	TSS1500	chr21:35287803-35288208	S_Shore	0.159827	0.0671909	-0.579603	1.90352e-06	0.000230757
cg08216099	NM_012293	PXDN	Body	NA	NA	0.632612	0.237273	-0.624931	1.90329e-06	0.0002308
cg02020483	NA	NA	NA	NA	NA	0.26723	0.519864	0.945378	1.90618e-06	0.000231009
cg23725986	NM_003203	GCFC2	TSS1500	chr2:75937657-75938139	S_Shore	0.26604	0.115091	-0.567392	1.90714e-06	0.000231053
cg06557507	NM_002390	ADAM11	Body	chr17:42852305-42853651	Island	0.0483938	0.0224727	-0.535628	1.91676e-06	0.000232076
cg02499139	NM_001161561	TNIK	Body	NA	NA	0.473571	0.763491	0.6122	1.92013e-06	0.000232412
cg03217995	NM_152739	HOXA9	Body	chr7:27203915-27206462	N_Shore	0.452903	0.745	0.644945	1.92899e-06	0.000233196
cg22125926	NM_148957	TNFRSF19	TSS200	NA	NA	0.213695	0.0989909	-0.536765	1.93139e-06	0.000233415
cg01069941	NA	NA	NA	NA	NA	0.177269	0.492436	1.7779	1.93286e-06	0.00023345
cg26613586	NA	NA	NA	NA	NA	0.215671	0.355555	0.648598	1.93417e-06	0.000233464
cg03548415	NA	NA	NA	NA	NA	0.674455	0.256945	-0.619032	1.93656e-06	0.000233537
cg02722596	NM_018918	PCDHGA5	Body	chr5:140764301-140764680	N_Shore	0.460958	0.773155	0.677276	1.94431e-06	0.000233969
cg16316624	NM_016499	TMEM216	TSS1500	chr11:61159836-61160285	N_Shore	0.201282	0.0519273	-0.742018	1.94315e-06	0.000233973
cg09966309	NM_021135	RPS6KA2	Body	NA	NA	0.657508	0.283864	-0.568273	1.9516e-06	0.00023463
cg10892950	NM_001025356	ANO6	Body	NA	NA	0.795173	0.223955	-0.718358	1.95962e-06	0.000235234
cg26446499	NA	NA	NA	NA	NA	0.265012	0.618991	1.33571	1.96497e-06	0.00023566
cg24837149	NM_001039577	CCNL2	Body	chr1:1334071-1335602	N_Shore	0.408723	0.152491	-0.626909	1.9829e-06	0.000237448
cg24800175	NM_001127221	CACNA1A	Body	chr19:13346962-13347346	N_Shore	0.133711	0.302282	1.26072	1.98387e-06	0.000237492
cg08313406	NA	NA	NA	NA	NA	0.578881	0.189855	-0.672032	1.98614e-06	0.000237546
cg27583307	NM_015265	SATB2	Body	chr2:200320502-200329681	Island	0.082831	0.0374091	-0.548368	1.98693e-06	0.000237568
cg00793843	NM_006384	CIB1	TSS1500	chr15:90776699-90777636	S_Shore	0.168958	0.0542	-0.679209	1.98519e-06	0.000237578
cg21433313	NM_024845	NAA60	TSS1500	chr16:3507545-3508606	N_Shore	0.103369	0.0389636	-0.623063	1.9897e-06	0.000237827
cg07389922	NM_001143775	CTDNEP1	Body	chr17:7154424-7156126	N_Shore	0.177593	0.0704727	-0.603178	1.99232e-06	0.000237995
cg24158844	NA	NA	NA	NA	NA	0.0405876	0.0840273	1.07027	2.01041e-06	0.000239573
cg11385013	NR_027307	BORCS8-MEF2B	Body	chr19:19256551-19256824	Island	0.12492	0.0586182	-0.530756	2.01174e-06	0.000239659
cg24638828	NA	NA	NA	NA	NA	0.512976	0.1329	-0.740924	2.01586e-06	0.000239931
cg13512987	NM_000616	CD4	5'UTR	NA	NA	0.251098	0.504673	1.00986	2.01872e-06	0.000240126
cg04772947	NM_000062	SERPING1	TSS1500	NA	NA	0.735993	0.347682	-0.527602	2.02101e-06	0.000240325
cg10884614	NM_001143760	EIF5A	3'UTR	chr17:7218175-7218960	N_Shelf	0.355117	0.129673	-0.634845	2.02888e-06	0.000241043
cg08403419	NM_181885	RXFP4	TSS1500	NA	NA	0.790255	0.374818	-0.5257	2.02855e-06	0.000241076
cg22670675	NM_001136217	TMEM51	5'UTR	NA	NA	0.504422	0.210873	-0.581952	2.03713e-06	0.000241803
cg24297365	NR_027240	LOC730668	TSS200	NA	NA	0.15466	0.0522091	-0.662427	2.03989e-06	0.000241838
cg20004315	NA	NA	NA	NA	NA	0.486988	0.221409	-0.54535	2.03938e-06	0.000241851
cg06021990	NM_002019	FLT1	Body	NA	NA	0.705546	0.311427	-0.558601	2.04186e-06	0.000241852
cg19409133	NR_030725	RCC1	Body	chr1:28844653-28845293	N_Shore	0.768402	0.237918	-0.690373	2.03891e-06	0.000241868
cg25031824	NM_002558	P2RX1	Body	NA	NA	0.537204	0.819782	0.526017	2.04158e-06	0.000241893
cg00057966	NR_029683	MIR142	TSS200	NA	NA	0.126864	0.517091	3.07596	2.03858e-06	0.000241903
cg06113001	NR_003039	GLYCAM1	Body	NA	NA	0.810251	0.284645	-0.648695	2.04156e-06	0.000241963
cg02574101	NR_026998	LOC91450	TSS200	NA	NA	0.809916	0.402782	-0.502687	2.04661e-06	0.000242269
cg05626927	NA	NA	NA	NA	NA	0.659509	0.266482	-0.595939	2.05252e-06	0.000242823
cg23268630	NM_144569	SPOCD1	Body	NA	NA	0.64846	0.304718	-0.53009	2.06276e-06	0.000243667
cg09059319	NA	NA	NA	NA	NA	0.146454	0.456318	2.11578	2.06273e-06	0.000243736
cg04674315	NA	NA	NA	NA	NA	0.426748	0.775518	0.817275	2.06267e-06	0.000243803
cg09606034	NM_001009612	C20orf202	1stExon	NA	NA	0.687038	0.263645	-0.616258	2.06231e-06	0.000243834
cg27228712	NA	NA	NA	NA	NA	0.687165	0.339873	-0.505398	2.06727e-06	0.000244127
cg01050273	NA	NA	NA	NA	NA	0.805488	0.300664	-0.626731	2.07441e-06	0.000244602
cg24013589	NA	NA	NA	NA	NA	0.537821	0.217009	-0.596503	2.07673e-06	0.000244728
cg09670535	NM_013945	PAX7	Body	chr1:18956895-18959829	Island	0.234241	0.530236	1.26364	2.09147e-06	0.00024558
cg07573985	NM_001014840	CUTA	TSS1500	chr6:33385678-33386262	S_Shore	0.291781	0.117318	-0.597923	2.09145e-06	0.000245652
cg00174508	NM_001018072	BTBD11	Body	NA	NA	0.662497	0.292073	-0.559134	2.09029e-06	0.000245663
cg13575139	NA	NA	NA	NA	NA	0.453916	0.153036	-0.662853	2.09094e-06	0.000245666
cg15145767	NM_004636	SEMA3B	5'UTR	NA	NA	0.689998	0.319245	-0.537324	2.09423e-06	0.000245831
cg09465703	NM_001005920	JMJD8	Body	chr16:729438-735815	Island	0.293874	0.0638727	-0.782653	2.09651e-06	0.000246025
cg24811864	NM_015879	ST8SIA3	TSS200	chr18:55019707-55021605	Island	0.202373	0.4761	1.35259	2.09902e-06	0.000246173
cg13438893	NA	NA	NA	NA	NA	0.0777398	0.513673	5.60759	2.10288e-06	0.000246185
cg00709652	NM_015429	ABI3BP	Body	NA	NA	0.576294	0.281264	-0.511944	2.09976e-06	0.000246187
cg21942490	NM_152739	HOXA9	TSS1500	chr7:27203915-27206462	Island	0.114632	0.376664	2.28585	2.09859e-06	0.000246196
cg12229841	NM_001013841	STAP2	TSS200	NA	NA	0.436571	0.137545	-0.684941	2.10271e-06	0.000246238
cg23141902	NM_000967	RPL3	Body	chr22:39715473-39715945	N_Shelf	0.251099	0.0893364	-0.644219	2.10445e-06	0.000246295
cg08686462	NR_003512	INS-IGF2	Body	NA	NA	0.346781	0.141009	-0.593378	2.10183e-06	0.000246355
cg19414591	NA	NA	NA	NA	NA	0.0776177	0.348045	3.4841	2.11008e-06	0.000246806
cg08243465	NM_199170	PMEPA1	5'UTR	NA	NA	0.75133	0.248455	-0.669314	2.11917e-06	0.000247207
cg03954858	NM_138435	FAM83F	Body	NA	NA	0.592827	0.267464	-0.548834	2.12151e-06	0.00024726
cg06217769	NM_017575	SMG6	Body	NA	NA	0.613619	0.212809	-0.65319	2.11746e-06	0.000247302
cg18588811	NR_029869	MIR377	TSS1500	NA	NA	0.827342	0.413409	-0.500317	2.12514e-06	0.000247462
cg05588972	NM_030907	RSG1	TSS200	chr1:16563544-16563799	S_Shore	0.145861	0.0715636	-0.509371	2.12804e-06	0.000247726
cg03055671	NM_003810	TNFSF10	Body	NA	NA	0.775254	0.201282	-0.740367	2.13025e-06	0.00024791
cg15927357	NM_001035005	C18orf32	TSS1500	chr18:47013321-47013901	Island	0.276208	0.0873909	-0.683605	2.13686e-06	0.000248385
cg09168808	NA	NA	NA	NA	NA	0.184224	0.591373	2.21008	2.14924e-06	0.000249381
cg17960769	NM_001162530	SH3D21	Body	chr1:36771830-36773009	Island	0.0886389	0.0411455	-0.535808	2.15047e-06	0.000249449
cg24631162	NM_080598	DDX39B	5'UTR	chr6:31509668-31509896	N_Shore	0.351633	0.157382	-0.552426	2.1518e-06	0.000249457
cg00752480	NA	NA	NA	NA	NA	0.649061	0.314955	-0.514754	2.1565e-06	0.000249854
cg14901243	NA	NA	NA	NA	NA	0.806189	0.2846	-0.646981	2.16138e-06	0.000250346
cg14631438	NM_153764	KCNJ1	5'UTR	NA	NA	0.686163	0.314009	-0.542369	2.16354e-06	0.000250522
cg11724055	NM_001102398	HNRNPR	Body	chr1:23670245-23671363	N_Shelf	0.698595	0.338182	-0.515911	2.16767e-06	0.000250778
cg05603985	NM_003036	SKI	1stExon	chr1:2158212-2161173	Island	0.338964	0.137218	-0.595183	2.16932e-06	0.000250821
cg11199046	NA	NA	NA	NA	NA	0.235676	0.475836	1.01903	2.17176e-06	0.000250956
cg19355555	NM_020871	LRCH2	TSS200	chrX:114468095-114468453	S_Shore	0.215153	0.545182	1.53393	2.17633e-06	0.000251115
cg09440866	NA	NA	NA	NA	NA	0.307524	0.128045	-0.583624	2.1753e-06	0.000251144
cg27321942	NR_000020	SNORD33	TSS1500	chr19:49991240-49991518	S_Shore	0.702417	0.314445	-0.552338	2.18956e-06	0.00025168
cg15466862	NM_005986	SOX1	1stExon	chr13:112720564-112723582	Island	0.107417	0.425364	2.95994	2.1893e-06	0.000251723
cg16266809	NA	NA	NA	NA	NA	0.889699	0.340027	-0.617818	2.18859e-06	0.000251789
cg14220262	NM_001130045	TTLL10	Body	chr1:1115574-1116006	N_Shore	0.719251	0.343155	-0.5229	2.18745e-06	0.000251805
cg00718336	NM_001042459	FILIP1L	5'UTR	NA	NA	0.709371	0.321691	-0.546512	2.18841e-06	0.000251843
cg26933683	NM_003077	SMARCD2	Body	chr17:61919659-61920656	N_Shore	0.610129	0.231964	-0.619812	2.2003e-06	0.000252693
cg09699039	NM_001029858	SLC35F1	Body	chr6:118241347-118241569	Island	0.150758	0.526555	2.49272	2.22314e-06	0.000254868
cg25386611	NM_000967	RPL3	Body	chr22:39715473-39715945	N_Shelf	0.448918	0.150927	-0.663797	2.22635e-06	0.000254938
cg22468751	NM_003980	MAP7	Body	NA	NA	0.217204	0.570891	1.62836	2.22576e-06	0.000255019
cg10243196	NR_003662	RPSAP58	Body	chr19:23945713-23946128	Island	0.0617478	0.448509	6.26357	2.23206e-06	0.000255443
cg00582970	NA	NA	NA	NA	NA	0.550308	0.178136	-0.676297	2.23293e-06	0.000255468
cg24530787	NM_032967	PCDH11X	5'UTR	chrX:91033993-91034623	Island	0.0686204	0.335736	3.89266	2.23508e-06	0.00025564
cg02448222	NM_001130720	AHCYL2	Body	NA	NA	0.128621	0.0585545	-0.544752	2.2488e-06	0.000256536
cg06908778	NM_172242	SPAG6	Body	chr10:22634000-22634862	Island	0.169263	0.437855	1.58683	2.24576e-06	0.000256562
[truncated: 10,123 more rows]
